# Supplementary material for: Sympathetic nociceptive afferent signaling drives the chronic structural and functional autonomic remodeling after myocardial infarction
Source: Research Square preprint supplement (doi:10.21203/rs.3.rs-6247307/v1), 2025-03-31
Supplement: Supplementary file 1 [file 6f6e87cacf3d7b6426ba3358.docx]

**Supplemental Figure 1**

**
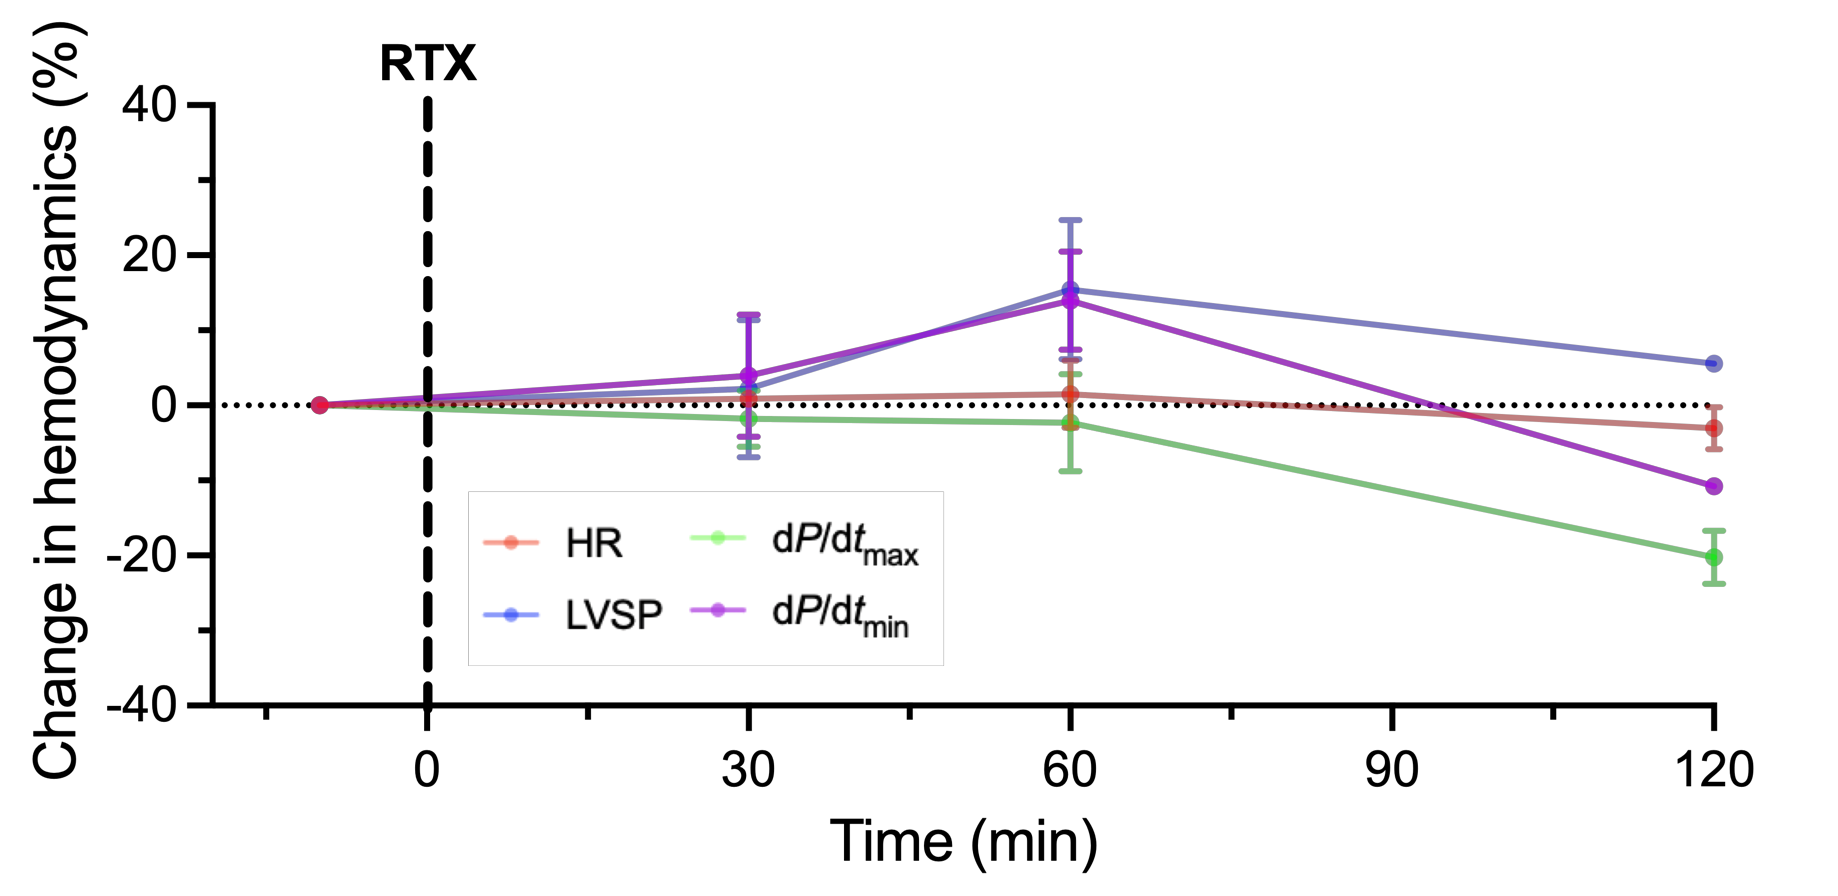
**

**Supplemental Figure 1. *Temporal hemodynamic responses to epidural RTX administration in healthy control animals (n=3).*** Percentage change in HR, LVSP, LV inotropy and lusitropy over time are shown.

**Supplemental Figure 2**

**
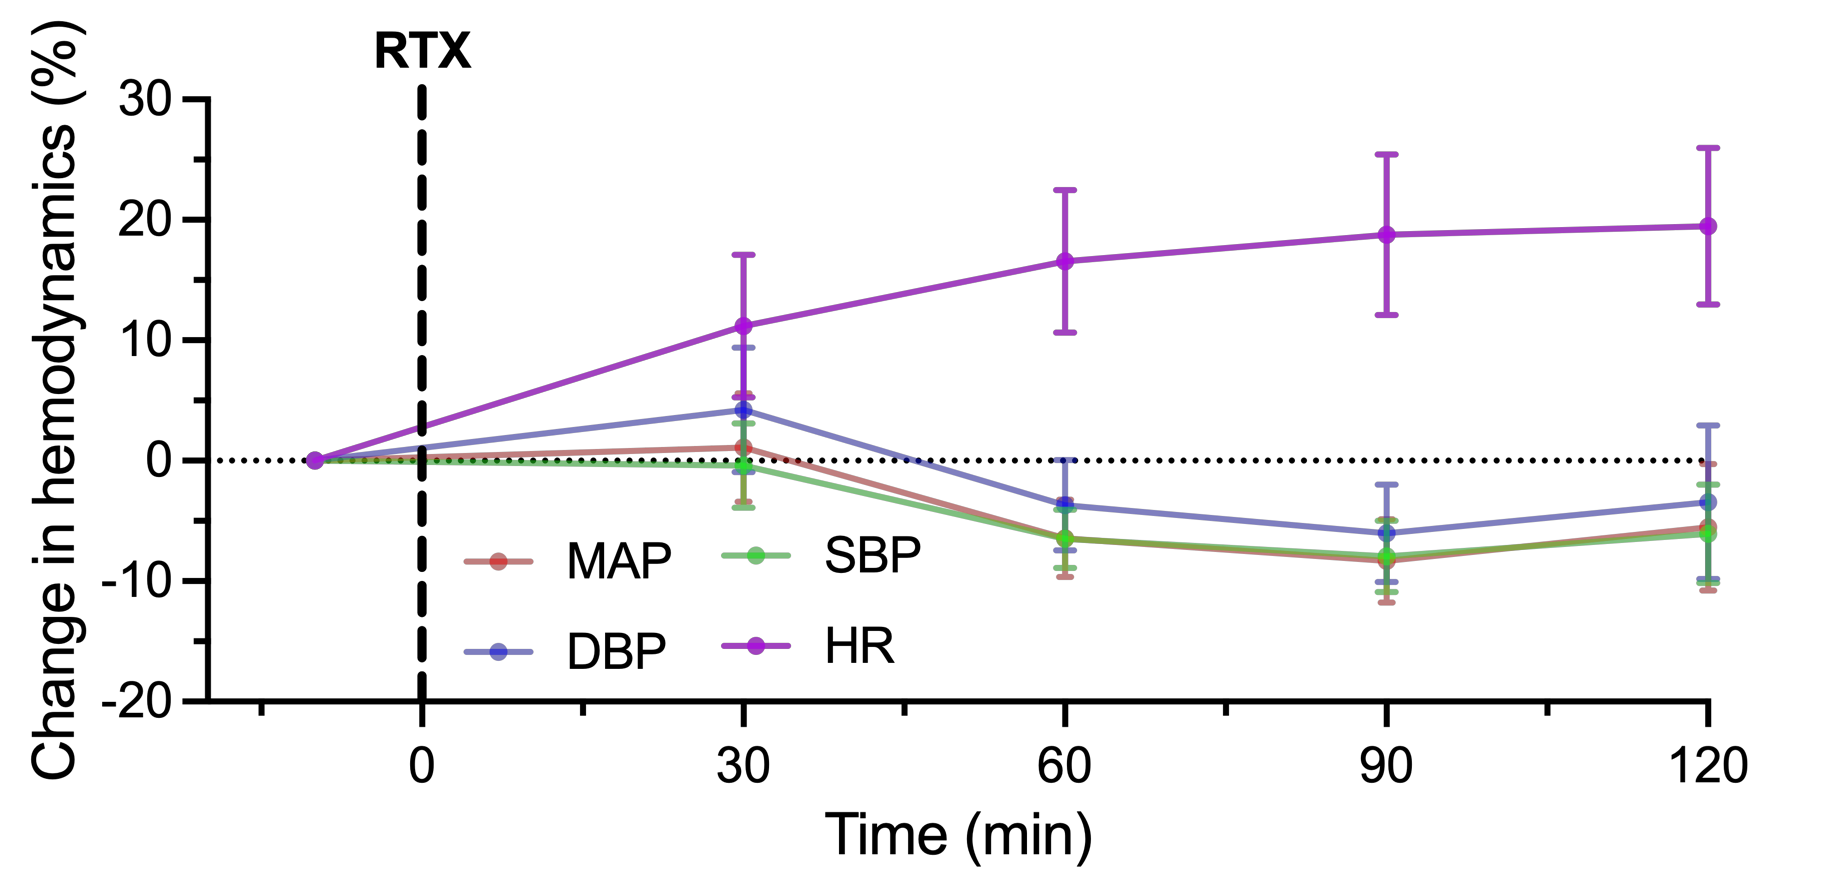
**

**Supplemental Figure 2. *Temporal hemodynamic responses to acute epidural RTX in epidural cRTX animals (n=11).*** Percentage change in HR, systolic (SBP) and diastolic blood pressure (DBP) and mean arterial pressure (MAP) over time are shown.

**Supplemental Figure 3**

**
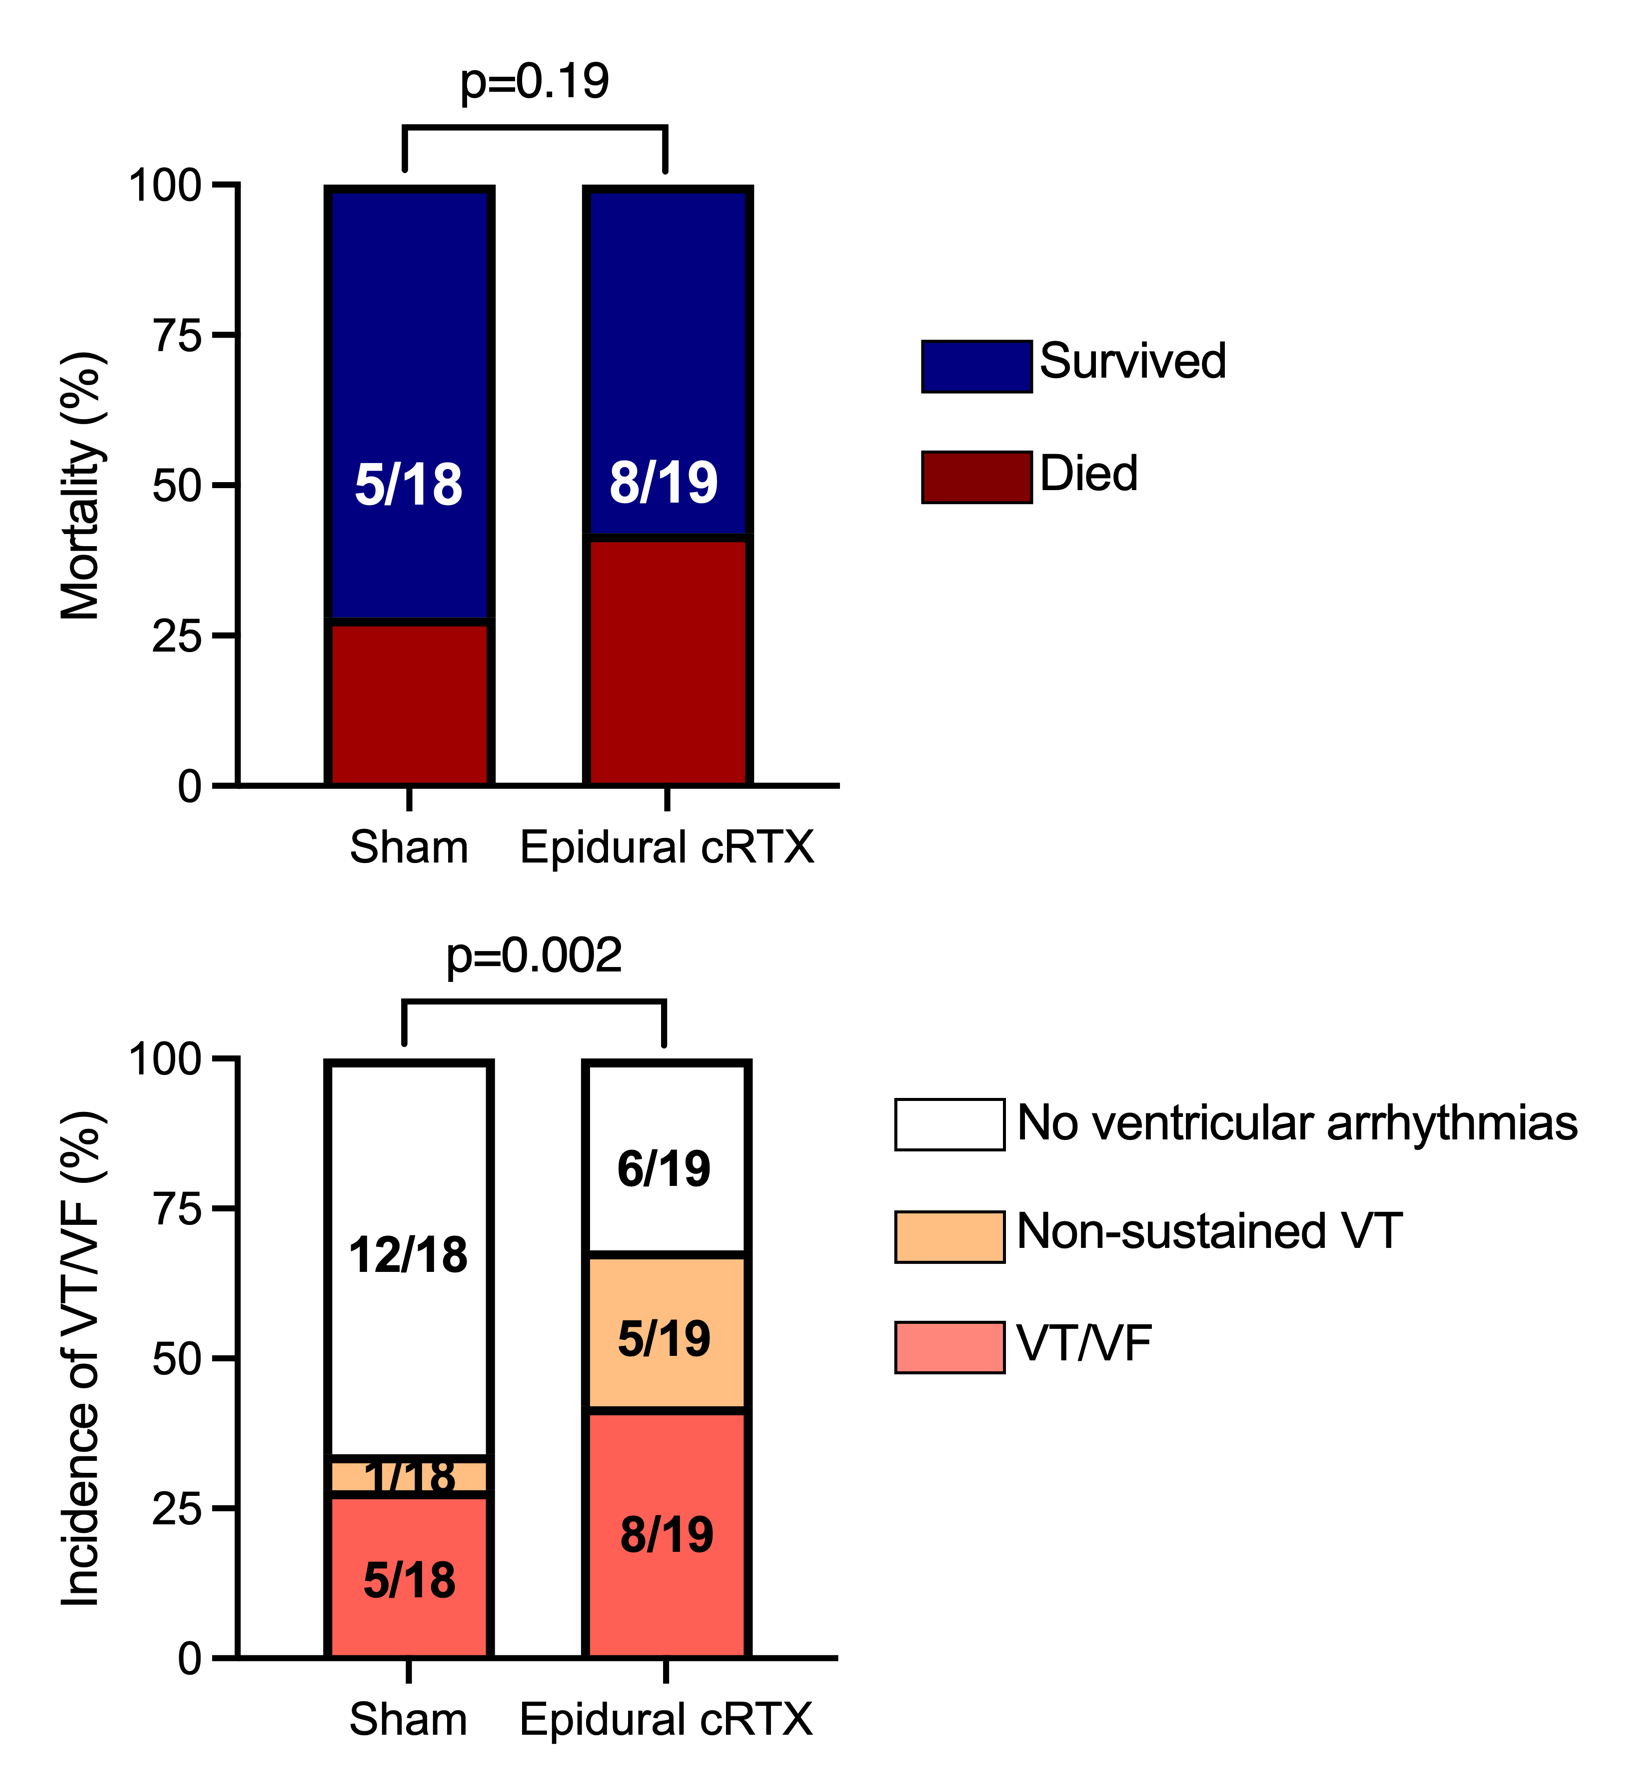
**

**Supplemental Figure 3.** Mortality during creation of myocardial infarction in sham and epidural cRTX animals. There was no difference in mortality at the time of MI. However, a greater number of animals had spontaneous non-sustained VT or VT/VF during at the time of acute MI creation. Comparisons were done using the binomial exact test.

**Supplemental Figure 4**


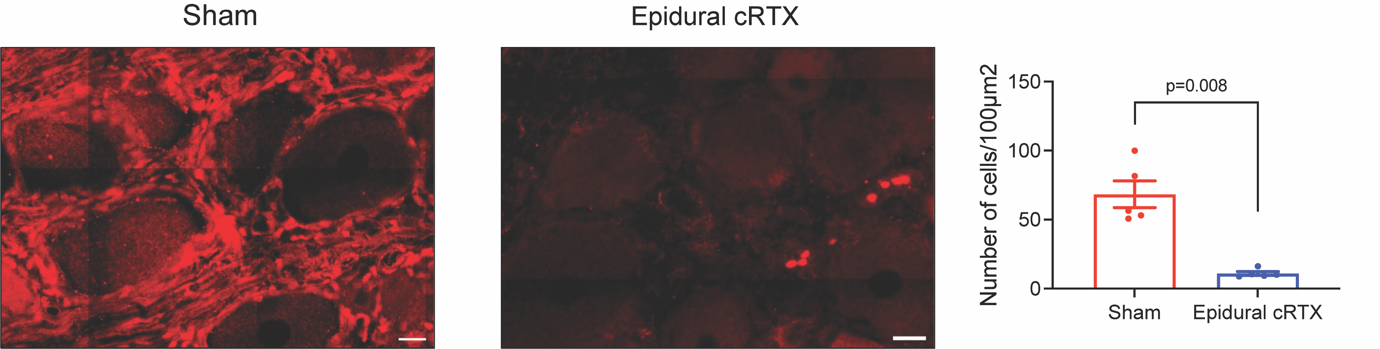


**Supplemental Figure 4. Assessment of glial activation in the T1 dorsal horn of sham and epidural cRTX animals.** Glial activation, assessed through immunohistochemical staining of glial fibrillary acidic protein (GFAP) in the T1 dorsal root ganglia showed significantly decreased glial activation in epidural cRTX (n = 5) vs sham (n = 5) animals. Comparison done using the Mann Whitney test.

**Supplemental Figure 5**

**
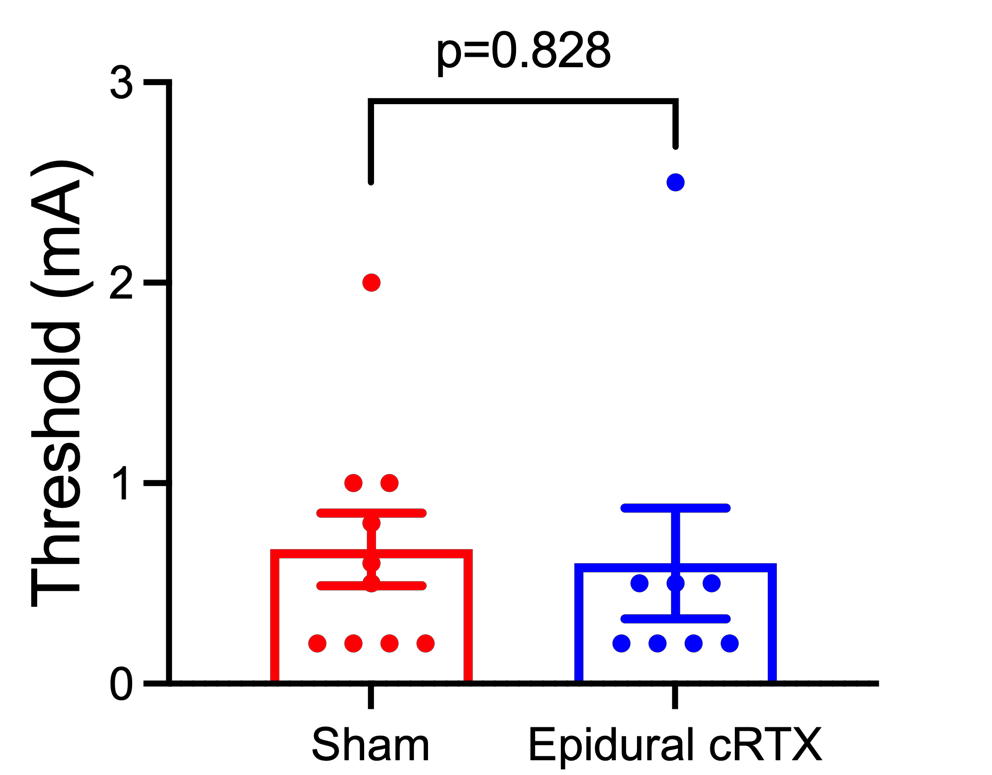
**

**Supplemental Figure 5.***Comparison of ventricular pacing threshold from the right ventricular endocardium in sham (n=10) and epidural cRTX (n=8) animals.* Comparison done using the unpaired Student’s t-test.
