# Supplementary material for: Sympathetic nociceptive afferent signaling drives the chronic structural and functional autonomic remodeling after myocardial infarction
Source: Research Square preprint supplement (doi:10.21203/rs.3.rs-6247307/v1), 2025-03-31
Supplement: Supplementary file 2 [file 77a1dd6d5b6d9ccd6b6f64ab.xlsx]

## Sheet: Relatively increased in sham 
name	p	n	n.set	genes	q	GeneRatio
GO_slim_generic.cell_differentiation	0.0414385	7	3587	SDC1;PTPRJ;OSTM1;CAMK2D;CAPRIN1;FHL1;CTNNB1	1	0.00195149
GO_slim_generic.cell_junction_organization	0.0218404	2	241	PTPRJ;CTNNB1	1	0.00829876
GO_slim_generic.cell_motility	0.00487894	5	1221	SDC1;PTPRJ;C5AR1;CAMK2D;CTNNB1	1	0.004095
GO_slim_generic.cellular_component	0.0271351	11	6736	SDC1;XYLT1;SGTA;PTPRJ;IMPG2;PPP2R5A;OSTM1;CAMK2D;CAPRIN1;FHL1;CTNNB1	1	0.00163302
GO_slim_generic.cellular_protein_modification_process	0.00242721	9	3448	USP15;PPP6C;PTPRJ;UBE2R2;C5AR1;PPP2R5A;CAMK2D;CTNNB1;MTTP	0.922635	0.00261021
GO_slim_generic.cytoplasm	0.00270791	12	5942	SDC1;USP15;SGTA;ANP32A;UBE2R2;PPP2R5A;OSTM1;CAMK2D;CAPRIN1;FHL1;CTNNB1;ALDH1A1	0.944846	0.00201952
GO_slim_generic.cytosol	0.00120065	9	3131	SGTA;PPP6C;C5AR1;OSTM1;CAMK2D;CAPRIN1;FHL1;CTNNB1;ALDH1A1	0.746309	0.00287448
GO_slim_generic.enzyme_binding	0.0136159	5	1562	PTPRJ;UBE2R2;PPP2R5A;CAMK2D;CTNNB1	1	0.00320102
GO_slim_generic.homeostatic_process	0.00964844	5	1436	C5AR1;CAMK2D;FHL1;CTNNB1;MTTP	1	0.00348189
GO_slim_generic.immune_system_process	0.0220292	6	2433	PTPRJ;C5AR1;OSTM1;GNL1;CAMK2D;CTNNB1	1	0.00246609
GO_slim_generic.kinase_activity	0.0402253	4	1397	PTPRJ;C5AR1;PPP2R5A;CAMK2D	1	0.00286328
GO_slim_generic.lipid_metabolic_process	0.0279137	4	1246	SDC1;PPP2R5A;ALDH1A1;MTTP	1	0.00321027
GO_slim_generic.organelle	0.0124039	8	3573	SDC1;PTPRJ;PPP2R5A;OSTM1;CAPRIN1;CTNNB1;ALDH1A1;MTTP	1	0.00223901
GO_slim_generic.phosphatase_activity	0.0065519	3	409	PPP6C;PTPRJ;PPP2R5A	1	0.00733496
GO_slim_generic.signal_transduction	0.045612	9	5365	SDC1;USP15;ANP32A;PTPRJ;C5AR1;PPP2R5A;GNL1;CAMK2D;CTNNB1	1	0.00167754
GO_slim_generic.sulfur_compound_metabolic_process	0.00414819	3	347	SDC1;XYLT1;CTNNB1	1	0.00864553
GO_slim_PIR.apical_part_of_cell	0.0409388	2	339	C5AR1;CTNNB1	1	0.00589971
GO_slim_PIR.cell_growth	0.00796069	3	439	PTPRJ;CAMK2D;FHL1	1	0.00683371
GO_slim_PIR.cell_leading_edge	0.0407202	2	338	PTPRJ;CTNNB1	1	0.00591716
GO_slim_PIR.cell_part	0.0494533	8	4560	SDC1;PTPRJ;C5AR1;CAMK2D;CAPRIN1;FHL1;CTNNB1;MTTP	1	0.00175439
GO_slim_PIR.cell_surface	0.0284696	3	708	SDC1;PTPRJ;C5AR1	1	0.00423729
GO_slim_PIR.cellular_component_organization	0.0373361	5	2021	PTPRJ;PPP2R5A;CAMK2D;FHL1;CTNNB1	1	0.00247402
GO_slim_PIR.cellular_lipid_metabolic_process	0.0109289	4	941	SDC1;PPP2R5A;ALDH1A1;MTTP	1	0.0042508
GO_slim_PIR.cellular_protein_modification_process	0.00356069	9	3638	USP15;PPP6C;PTPRJ;UBE2R2;C5AR1;PPP2R5A;CAMK2D;CTNNB1;MTTP	1	0.00247389
GO_slim_PIR.chromosome_organization	0.0456615	3	853	USP15;CAMK2D;CTNNB1	1	0.003517
GO_slim_PIR.hydrolase_activity	0.00727849	7	2569	USP15;PPP6C;PTPRJ;C5AR1;PPP2R5A;GNL1;ALDH1A1	1	0.0027248
GO_slim_PIR.immune_system_process	0.0220292	6	2433	PTPRJ;C5AR1;OSTM1;GNL1;CAMK2D;CTNNB1	1	0.00246609
GO_slim_PIR.intracellular	0.00173597	15	8619	SDC1;USP15;SGTA;PPP6C;ANP32A;PTPRJ;UBE2R2;C5AR1;PPP2R5A;OSTM1;CAMK2D;CAPRIN1;FHL1;CTNNB1;ALDH1A1	0.922635	0.00174034
GO_slim_PIR.intracellular_non_membrane_bounded_organelle	0.00752069	3	430	PPP2R5A;CAPRIN1;CTNNB1	1	0.00697674
GO_slim_PIR.ion_transport	0.0483651	4	1482	OSTM1;CAMK2D;FHL1;CTNNB1	1	0.00269906
GO_slim_PIR.localization	0.0103607	5	1461	SDC1;PTPRJ;C5AR1;CAMK2D;CTNNB1	1	0.00342231
GO_slim_PIR.locomotion	0.0149677	5	1599	SDC1;PTPRJ;C5AR1;CAMK2D;CTNNB1	1	0.00312695
GO_slim_PIR.membrane	0.0197157	13	8421	SDC1;XYLT1;SGTA;PTPRJ;C5AR1;IMPG2;PPP2R5A;OSTM1;CAMK2D;CAPRIN1;FHL1;CTNNB1;MTTP	1	0.00154376
GO_slim_PIR.microvillus	0.00301379	2	86	CTNNB1;MTTP	1	0.0232558
GO_slim_PIR.movement_of_cell_or_subcellular_component	0.0212995	5	1747	SDC1;PTPRJ;C5AR1;CAMK2D;CTNNB1	1	0.00286205
GO_slim_PIR.nuclear_division	0.0193858	4	1115	PPP6C;CAMK2D;FHL1;CTNNB1	1	0.00358744
GO_slim_PIR.phosphorus_metabolic_process	0.00641368	7	2511	USP15;PPP6C;PTPRJ;C5AR1;PPP2R5A;CAMK2D;CTNNB1	1	0.00278773
GO_slim_PIR.protein_metabolic_process	0.0264851	4	1226	SDC1;XYLT1;CTNNB1;MTTP	1	0.00326264
GO_slim_PIR.receptor_complex	0.0370747	2	321	IMPG2;MTTP	1	0.00623053
GO_slim_PIR.response_to_stimulus	0.023371	12	7568	SDC1;XYLT1;USP15;SGTA;ANP32A;PTPRJ;C5AR1;PPP2R5A;GNL1;CAMK2D;CTNNB1;MTTP	1	0.00158562
GO_slim_PIR.transferase_activity	0.0128406	7	2852	XYLT1;PTPRJ;UBE2R2;C5AR1;PPP2R5A;CAMK2D;CTNNB1	1	0.00245442
GO_slim_PIR.vesicle	0.0359848	7	3485	SDC1;PTPRJ;C5AR1;CAMK2D;CTNNB1;ALDH1A1;MTTP	1	0.00200861
GO.apical_part_of_cell	0.00242506	2	77	C5AR1;CTNNB1	0.922635	0.025974
GO.basolateral_plasma_membrane	0.000655999	3	182	C5AR1;CTNNB1;MTTP	0.600519	0.0164835
GO.canonical_Wnt_signaling_pathway	0.00301379	2	86	SDC1;CTNNB1	1	0.0232558
GO.cell_cell_junction	0.00946309	2	155	PTPRJ;CTNNB1	1	0.0129032
GO.cell_surface	0.0117807	3	507	SDC1;PTPRJ;C5AR1	1	0.00591716
GO.cellular_response_to_heat	0.00397053	2	99	XYLT1;CAMK2D	1	0.020202
GO.cytoplasm	0.000341185	12	4803	SDC1;USP15;SGTA;ANP32A;UBE2R2;PPP2R5A;OSTM1;CAMK2D;CAPRIN1;FHL1;CTNNB1;ALDH1A1	0.438765	0.00249844
GO.cytosol	0.000909354	9	3016	SGTA;PPP6C;C5AR1;OSTM1;CAMK2D;CAPRIN1;FHL1;CTNNB1;ALDH1A1	0.627535	0.00298408
GO.focal_adhesion	0.00550215	3	384	SDC1;FHL1;CTNNB1	1	0.0078125
GO.G1/S_transition_of_mitotic_cell_cycle	0.00934628	2	154	PPP6C;CAMK2D	1	0.012987
GO.glycosaminoglycan_biosynthetic_process	0.000693681	2	41	SDC1;XYLT1	0.600519	0.0487805
GO.inflammatory_response	0.0387734	2	329	SDC1;C5AR1	1	0.00607903
GO.integral_component_of_plasma_membrane	0.0345919	4	1332	SDC1;PTPRJ;C5AR1;CAPRIN1	1	0.003003
GO.ion_channel_binding	0.000106212	3	98	CAMK2D;FHL1;CTNNB1	0.241462	0.0306122
GO.kinase_binding	0.00184293	2	67	PPP2R5A;CTNNB1	0.922635	0.0298507
GO.lipoprotein_metabolic_process	0.000564689	2	37	SDC1;MTTP	0.584528	0.0540541
GO.membrane	0.011678	6	2122	SDC1;SGTA;PPP2R5A;CAMK2D;CAPRIN1;CTNNB1	1	0.00282752
GO.microvillus_membrane	0.000146482	2	19	CTNNB1;MTTP	0.280634	0.105263
GO.negative_regulation_of_cell_growth	0.00558943	2	118	PTPRJ;FHL1	1	0.0169492
GO.negative_regulation_of_cell_proliferation	0.0486363	2	373	PTPRJ;CTNNB1	1	0.00536193
GO.osteoclast_differentiation	0.000277293	2	26	OSTM1;CTNNB1	0.430553	0.0769231
GO.perinuclear_region_of_cytoplasm	0.0176742	3	590	ANP32A;CAMK2D;CTNNB1	1	0.00508475
GO.positive_regulation_of_ERK1_and_ERK2_cascade	0.00911465	2	152	C5AR1;CAMK2D	1	0.0131579
GO.proteasome_mediated_ubiquitin_dependent_protein_catabolic_process	0.0105438	2	164	USP15;UBE2R2	1	0.0121951
GO.protein_C_terminus_binding	0.0125936	2	180	SDC1;CTNNB1	1	0.0111111
GO.protein_complex	0.0383459	2	327	SDC1;CTNNB1	1	0.00611621
GO.receptor_complex	0.00615385	2	124	IMPG2;MTTP	1	0.016129
GO.regulation_of_membrane_depolarization	2.41362e-05	2	8	CAMK2D;FHL1	0.241462	0.25
GO.response_to_calcium_ion	0.00138489	2	58	SDC1;MTTP	0.827047	0.0344828
GO.signal_transduction	0.0154066	4	1041	C5AR1;PPP2R5A;GNL1;CTNNB1	1	0.00384246
GO.SMAD_binding	0.000798905	2	44	USP15;CTNNB1	0.600519	0.0454545
GO.Z_disc	0.00487632	2	110	PPP2R5A;CTNNB1	1	0.0181818

## Sheet: Increased in epidural cRTX
name	p	n	n.set	genes	q	GeneRatio
GO_slim_generic.anatomical_structure_development	0.0150774	13	4140	VDAC1;CPS1;DYNLL1;CAD;PRDX3;ZAP70;ALOX15;IGFBP1;PCDHAC2;GNB1;CUL1;PGK1;LGALS1	0.839092	0.0031401
GO_slim_generic.biological_process	0.000434193	25	8719	HSPA9;RPS15A;CLIC5;PRDX5;RPL31;PGAM2;SET;CPS1;DYNLL1;CAD;PRDX3;PSMD8;ADSL;ALOX15;IGFBP1;ARHGDIA;ACTN1;VAV1;GNB1;CUL1;CAPZA1;PGK1;LGALS1;ACTR2;LIPG	0.170676	0.0028673
GO_slim_generic.catabolic_process	0.00354562	8	1527	PRDX5;PGAM2;CPS1;PRDX3;PSMD8;CUL1;PGK1;LIPG	0.466564	0.00523903
GO_slim_generic.cell	0.0238899	10	2983	HSPA9;VDAC1;STX11;CAD;PRDX3;ACTN1;GNB1;LGALS1;ACTR2;LIPG	1	0.00335233
GO_slim_generic.cell_adhesion	0.00196956	8	1390	STX11;ZAP70;ALOX15;ARHGDIA;ACTN1;PCDHAC2;VAV1;LGALS1	0.343611	0.0057554
GO_slim_generic.cell_death	8.25614e-06	13	1924	HSPA9;PRDX5;VDAC1;SET;DYNLL1;PRDX3;PSMD8;ARHGDIA;ACTN1;VAV1;GNB1;CUL1;LGALS1	0.0122089	0.00675676
GO_slim_generic.cellular_amino_acid_metabolic_process	0.0312856	3	404	CPS1;CAD;PSMD8	1	0.00742574
GO_slim_generic.cellular_component	0.0169559	18	6736	HSPA9;RPS15A;VDAC1;RPL31;STX11;DYNLL1;CAD;ZAP70;ALOX15;ACTN1;LASP1;VAV1;GNB1;CAPZA1;PGK1;LGALS1;CORO7;ACTR2	0.892093	0.00267221
GO_slim_generic.cellular_nitrogen_compound_metabolic_process	0.0410012	14	5213	RPS15A;PRDX5;RPL31;PGAM2;SET;CPS1;DYNLL1;CAD;PSMD8;ADSL;ACTN1;VAV1;GNB1;PGK1	1	0.00268559
GO_slim_generic.cofactor_metabolic_process	0.0198918	3	339	PRDX5;PGAM2;PGK1	0.996321	0.00884956
GO_slim_generic.cytoplasm	0.00139016	19	5942	HSPA9;RPS15A;CLIC5;PRDX5;SET;CPS1;STX11;DYNLL1;CAD;PRDX3;ZAP70;ARHGDIA;ACTN1;LASP1;PPIC;CAPZA1;LGALS1;CORO7;ACTR2	0.285894	0.00319758
GO_slim_generic.cytoskeletal_protein_binding	0.00190112	6	782	ACTN1;LASP1;GNB1;CAPZA1;CORO7;ACTR2	0.340599	0.00767263
GO_slim_generic.cytoskeleton	0.0196219	7	1649	CLIC5;DYNLL1;ARHGDIA;ACTN1;LASP1;CAPZA1;ACTR2	0.985986	0.004245
GO_slim_generic.cytoskeleton_organization	0.0079199	6	1046	DYNLL1;ALOX15;ACTN1;CAPZA1;CORO7;ACTR2	0.590269	0.00573614
GO_slim_generic.cytosol	1.48372e-09	21	3131	RPS15A;PRDX5;RPL31;PGAM2;SET;DYNLL1;CAD;PRDX3;PSMD8;ADSL;ZAP70;ALOX15;ARHGDIA;ACTN1;VAV1;GNB1;CUL1;CAPZA1;PGK1;CORO7;ACTR2	6.5822e-06	0.00670712
GO_slim_generic.enzyme_binding	0.0149307	7	1562	HSPA9;VDAC1;CAD;PRDX3;ARHGDIA;GNB1;CUL1	0.832419	0.00448143
GO_slim_generic.extracellular_region	6.52458e-10	23	3746	HSPA9;RPS15A;CLIC5;PRDX5;VDAC1;RPL31;PGAM2;DYNLL1;CAD;PRDX3;PSMD8;IGFBP1;ARHGDIA;ACTN1;PIGR;LASP1;PPIC;GNB1;CAPZA1;PGK1;LGALS1;ACTR2;LIPG	3.79572e-06	0.00613988
GO_slim_generic.extracellular_space	0.00472632	7	1257	PRDX5;IGFBP1;ARHGDIA;ACTN1;PIGR;LGALS1;LIPG	0.47042	0.00556881
GO_slim_generic.generation_of_precursor_metabolites_and_energy	0.00101673	5	458	PGAM2;CPS1;ADSL;GNB1;PGK1	0.244755	0.010917
GO_slim_generic.homeostatic_process	0.0329847	6	1436	PRDX5;CPS1;PIGR;GNB1;LGALS1;LIPG	1	0.00417827
GO_slim_generic.immune_system_process	0.000101791	13	2433	STX11;DYNLL1;PRDX3;PSMD8;ZAP70;ALOX15;ACTN1;PIGR;VAV1;CUL1;CAPZA1;LGALS1;ACTR2	0.059642	0.0053432
GO_slim_generic.intracellular	0.0170352	14	4686	PRDX5;VDAC1;STX11;DYNLL1;PSMD8;ZAP70;ALOX15;ARHGDIA;ACTN1;VAV1;GNB1;CUL1;LGALS1;ACTR2	0.892093	0.00298762
GO_slim_generic.isomerase_activity	0.000576548	4	226	PGAM2;ALOX15;PPIC;PGK1	0.185116	0.0176991
GO_slim_generic.ligase_activity	0.0140026	4	551	CPS1;CAD;PSMD8;CUL1	0.808174	0.00725953
GO_slim_generic.lyase_activity	0.006134	4	433	PGAM2;ADSL;GNB1;PGK1	0.533572	0.00923788
GO_slim_generic.membrane_organization	0.000474273	9	1417	RPS15A;RPL31;STX11;DYNLL1;ALOX15;PIGR;VAV1;ACTR2;LIPG	0.174076	0.00635145
GO_slim_generic.mitochondrion	0.0193269	7	1644	HSPA9;PRDX5;VDAC1;CPS1;DYNLL1;PRDX3;ADSL	0.975899	0.00425791
GO_slim_generic.mitochondrion_organization	0.00556689	5	678	HSPA9;VDAC1;DYNLL1;PRDX3;PSMD8	0.504007	0.00737463
GO_slim_generic.molecular_function	0.0154267	27	12011	HSPA9;CLIC5;PRDX5;VDAC1;PGAM2;SET;CPS1;STX11;DYNLL1;CAD;PRDX3;ADSL;ZAP70;ALOX15;IGFBP1;ARHGDIA;ACTN1;LASP1;PPIC;VAV1;GNB1;CUL1;CAPZA1;PGK1;LGALS1;CORO7;LIPG	0.853943	0.00224794
GO_slim_generic.nitrogen_cycle_metabolic_process	0.000335445	2	16	CPS1;CAD	0.139444	0.125
GO_slim_generic.organelle	1.72731e-08	21	3573	HSPA9;RPS15A;CLIC5;PRDX5;VDAC1;RPL31;PGAM2;DYNLL1;CAD;PRDX3;PSMD8;ARHGDIA;ACTN1;PIGR;LASP1;PPIC;GNB1;CAPZA1;PGK1;LGALS1;ACTR2	6.70499e-05	0.00587741
GO_slim_generic.oxidoreductase_activity	0.0129367	5	833	PRDX5;PGAM2;PRDX3;ALOX15;PGK1	0.78464	0.0060024
GO_slim_generic.protein_complex	0.000711865	16	4229	CLIC5;VDAC1;SET;CPS1;STX11;DYNLL1;CAD;PRDX3;PSMD8;ZAP70;ACTN1;PIGR;GNB1;CUL1;CAPZA1;ACTR2	0.204943	0.0037834
GO_slim_generic.protein_complex_assembly	0.0143621	6	1189	SET;ADSL;ALOX15;CAPZA1;CORO7;ACTR2	0.816677	0.00504626
GO_slim_generic.protein_targeting	0.0272421	4	675	HSPA9;RPS15A;RPL31;PSMD8	1	0.00592593
GO_slim_generic.response_to_stress	4.26767e-05	17	3766	PRDX5;VDAC1;CPS1;STX11;PRDX3;PSMD8;ADSL;ZAP70;ALOX15;IGFBP1;ACTN1;VAV1;GNB1;CUL1;CAPZA1;LGALS1;ACTR2	0.0315543	0.00451407
GO_slim_generic.small_molecule_metabolic_process	0.0145079	9	2342	PRDX5;PGAM2;CPS1;CAD;PSMD8;ADSL;ALOX15;GNB1;PGK1	0.822011	0.00384287
GO_slim_generic.structural_constituent_of_ribosome	0.0301548	2	159	RPS15A;RPL31	1	0.0125786
GO_slim_generic.symbiosis_encompassing_mutualism_through_parasitism	6.0987e-05	8	829	RPS15A;VDAC1;RPL31;SET;DYNLL1;PSMD8;CUL1;LGALS1	0.0411716	0.00965018
GO_slim_generic.vesicle_mediated_transport	0.00140925	8	1319	STX11;ALOX15;ACTN1;PIGR;VAV1;CORO7;ACTR2;LIPG	0.286032	0.0060652
GO_slim_PIR.amino_acid_binding	0.02415	2	141	CPS1;CAD	1	0.0141844
GO_slim_PIR.antioxidant_activity	0.00709637	2	74	PRDX5;PRDX3	0.575764	0.027027
GO_slim_PIR.binding	0.0363128	2	176	CPS1;LGALS1	1	0.0113636
GO_slim_PIR.biological_regulation	0.00459525	26	10587	HSPA9;RPS15A;CLIC5;PRDX5;VDAC1;PGAM2;SET;CPS1;STX11;DYNLL1;PRDX3;PSMD8;ZAP70;ALOX15;IGFBP1;ARHGDIA;ACTN1;PIGR;LASP1;VAV1;GNB1;CUL1;CAPZA1;LGALS1;ACTR2;LIPG	0.466564	0.00245584
GO_slim_PIR.catalytic_activity	0.0263899	3	378	SET;ADSL;ARHGDIA	1	0.00793651
GO_slim_PIR.cell_activation	0.00417996	6	916	STX11;ZAP70;ACTN1;VAV1;GNB1;LGALS1	0.466564	0.00655022
GO_slim_PIR.cell_adhesion	0.00196956	8	1390	STX11;ZAP70;ALOX15;ARHGDIA;ACTN1;PCDHAC2;VAV1;LGALS1	0.343611	0.0057554
GO_slim_PIR.cell_killing	0.00865125	2	82	STX11;VAV1	0.599678	0.0243902
GO_slim_PIR.cell_part	0.0134413	14	4560	HSPA9;VDAC1;STX11;DYNLL1;CAD;PRDX3;ZAP70;ALOX15;ARHGDIA;ACTN1;PIGR;PCDHAC2;VAV1;GNB1	0.808174	0.00307018
GO_slim_PIR.cell_projection	0.0351471	3	423	CAD;ACTN1;ACTR2	1	0.0070922
GO_slim_PIR.cellular_amide_metabolic_process	0.00254753	3	160	PGAM2;CPS1;CAD	0.402499	0.01875
GO_slim_PIR.cellular_component	0.0136885	10	2740	HSPA9;RPL31;STX11;ZAP70;ACTN1;LASP1;VAV1;CAPZA1;LGALS1;ACTR2	0.808174	0.00364964
GO_slim_PIR.cellular_component_disassembly	0.00556689	5	678	RPS15A;VDAC1;RPL31;SET;LIPG	0.504007	0.00737463
GO_slim_PIR.cellular_component_organization	0.0015293	10	2021	RPS15A;RPL31;STX11;ALOX15;IGFBP1;PIGR;VAV1;LGALS1;ACTR2;LIPG	0.302336	0.00494805
GO_slim_PIR.cellular_localization	0.00133897	12	2745	HSPA9;RPS15A;VDAC1;RPL31;SET;STX11;DYNLL1;PSMD8;ACTN1;PIGR;CORO7;ACTR2	0.282856	0.00437158
GO_slim_PIR.cellular_metabolic_process	0.00183965	11	2449	HSPA9;RPS15A;PRDX5;RPL31;CPS1;PRDX3;PSMD8;IGFBP1;VAV1;CUL1;LIPG	0.33535	0.00449163
GO_slim_PIR.cellular_process	2.4411e-05	23	6412	HSPA9;RPS15A;CLIC5;PRDX5;VDAC1;SET;CPS1;STX11;DYNLL1;CAD;PRDX3;PSMD8;ZAP70;ALOX15;ARHGDIA;ACTN1;LASP1;VAV1;GNB1;CUL1;PGK1;LGALS1;ACTR2	0.0236893	0.00358702
GO_slim_PIR.coagulation	0.0132496	4	542	ACTN1;VAV1;GNB1;CAPZA1	0.79894	0.00738007
GO_slim_PIR.cofactor_metabolic_process	0.018982	3	333	PRDX5;PGAM2;PGK1	0.964021	0.00900901
GO_slim_PIR.cytoskeleton	0.0224889	7	1695	CLIC5;DYNLL1;ARHGDIA;ACTN1;LASP1;CAPZA1;ACTR2	1	0.00412979
GO_slim_PIR.energy_reserve_metabolic_process	0.0366891	2	177	CPS1;GNB1	1	0.0112994
GO_slim_PIR.extracellular_organelle	6.81061e-11	21	2662	HSPA9;RPS15A;CLIC5;PRDX5;VDAC1;RPL31;PGAM2;DYNLL1;CAD;PRDX3;PSMD8;ARHGDIA;ACTN1;PIGR;LASP1;PPIC;GNB1;CAPZA1;PGK1;LGALS1;ACTR2	1.05748e-06	0.00788881
GO_slim_PIR.extracellular_region	0.0317629	8	2237	PRDX5;IGFBP1;ARHGDIA;ACTN1;PIGR;CAPZA1;LGALS1;LIPG	1	0.00357622
GO_slim_PIR.generation_of_precursor_metabolites_and_energy	0.0201635	2	128	PGAM2;PGK1	1	0.015625
GO_slim_PIR.immune_system_process	0.000101791	13	2433	STX11;DYNLL1;PRDX3;PSMD8;ZAP70;ALOX15;ACTN1;PIGR;VAV1;CUL1;CAPZA1;LGALS1;ACTR2	0.059642	0.0053432
GO_slim_PIR.intracellular	3.52159e-06	28	8619	HSPA9;RPS15A;CLIC5;PRDX5;VDAC1;RPL31;PGAM2;SET;CPS1;STX11;DYNLL1;CAD;PRDX3;PSMD8;ADSL;ZAP70;ALOX15;ARHGDIA;ACTN1;PPIC;VAV1;GNB1;CUL1;CAPZA1;PGK1;LGALS1;CORO7;ACTR2	0.00643291	0.00324864
GO_slim_PIR.intracellular_non_membrane_bounded_organelle	0.000766343	5	430	HSPA9;VDAC1;CPS1;ALOX15;ACTN1	0.208754	0.0116279
GO_slim_PIR.isomerase_activity	0.000576548	4	226	PGAM2;ALOX15;PPIC;PGK1	0.185116	0.0176991
GO_slim_PIR.ligase_activity	0.0132496	4	542	CPS1;CAD;PSMD8;CUL1	0.79894	0.00738007
GO_slim_PIR.lyase_activity	0.006134	4	433	PGAM2;ADSL;GNB1;PGK1	0.533572	0.00923788
GO_slim_PIR.membrane	0.038978	20	8421	RPS15A;CLIC5;VDAC1;RPL31;CPS1;STX11;DYNLL1;CAD;ZAP70;ALOX15;ARHGDIA;ACTN1;PIGR;PCDHAC2;VAV1;GNB1;CAPZA1;PGK1;CORO7;ACTR2	1	0.00237501
GO_slim_PIR.metabolic_process	0.0123043	10	2697	CLIC5;PRDX5;PGAM2;CPS1;CAD;PSMD8;ADSL;ALOX15;GNB1;PGK1	0.762669	0.00370782
GO_slim_PIR.mitochondrion	0.0193269	7	1644	HSPA9;PRDX5;VDAC1;CPS1;DYNLL1;PRDX3;ADSL	0.975899	0.00425791
GO_slim_PIR.mitochondrion_organization	0.00556689	5	678	HSPA9;VDAC1;DYNLL1;PRDX3;PSMD8	0.504007	0.00737463
GO_slim_PIR.movement_of_cell_or_subcellular_component	0.0260737	7	1747	DYNLL1;ZAP70;ARHGDIA;ACTN1;VAV1;CAPZA1;ACTR2	1	0.00400687
GO_slim_PIR.multi_organism_process	0.0180107	7	1621	RPS15A;CLIC5;PGAM2;CPS1;DYNLL1;CAD;PRDX3	0.932171	0.00431832
GO_slim_PIR.multicellular_organismal_process	0.000293622	19	5302	CLIC5;PRDX5;VDAC1;PGAM2;CPS1;DYNLL1;CAD;PRDX3;ZAP70;ALOX15;ARHGDIA;ACTN1;PIGR;PCDHAC2;GNB1;CUL1;LGALS1;ACTR2;LIPG	0.13224	0.00358355
GO_slim_PIR.nuclear_division	0.0395514	5	1115	SET;DYNLL1;PSMD8;CUL1;ACTR2	1	0.0044843
GO_slim_PIR.nucleobase_containing_compound_metabolic_process	0.0112982	3	274	CPS1;CAD;ADSL	0.717495	0.0109489
GO_slim_PIR.nucleoside_binding	0.0167983	8	1989	HSPA9;CPS1;CAD;ZAP70;ARHGDIA;VAV1;PGK1;ACTR2	0.889409	0.00402212
GO_slim_PIR.nucleoside_metabolic_process	0.0012461	4	278	PGAM2;CAD;ADSL;PGK1	0.27214	0.0143885
GO_slim_PIR.nucleotide_metabolic_process	0.000638639	6	633	PRDX5;PGAM2;CAD;ADSL;GNB1;PGK1	0.195334	0.00947867
GO_slim_PIR.organelle_organization	0.0317328	6	1423	DYNLL1;ALOX15;ACTN1;CAPZA1;CORO7;ACTR2	1	0.00421644
GO_slim_PIR.organic_acid_metabolic_process	0.00945027	6	1086	PGAM2;CPS1;CAD;PSMD8;ALOX15;PGK1	0.630446	0.00552486
GO_slim_PIR.oxidoreductase_activity	0.0269844	4	673	PRDX5;PGAM2;PRDX3;PGK1	1	0.00594354
GO_slim_PIR.phosphorus_metabolic_process	0.00225435	11	2511	PGAM2;SET;CPS1;DYNLL1;CAD;PRDX3;ADSL;ZAP70;ALOX15;PGK1;LIPG	0.382549	0.00438072
GO_slim_PIR.primary_metabolic_process	0.0213013	3	348	CPS1;CAD;PSMD8	1	0.00862069
GO_slim_PIR.protein_binding	0.00274494	26	10289	HSPA9;CLIC5;PRDX5;VDAC1;SET;CPS1;STX11;DYNLL1;CAD;PRDX3;ZAP70;ALOX15;IGFBP1;ARHGDIA;ACTN1;PIGR;LASP1;PPIC;VAV1;GNB1;CUL1;CAPZA1;PGK1;LGALS1;CORO7;ACTR2	0.41785	0.00252697
GO_slim_PIR.protein_complex	0.000473318	12	2448	CLIC5;VDAC1;SET;CPS1;STX11;DYNLL1;CAD;PRDX3;ACTN1;GNB1;CAPZA1;ACTR2	0.174076	0.00490196
GO_slim_PIR.protein_polymerization	0.000636085	4	232	ALOX15;CAPZA1;CORO7;ACTR2	0.195334	0.0172414
GO_slim_PIR.regulation_of_body_fluid_levels	0.00595441	5	689	CAD;ACTN1;VAV1;GNB1;CAPZA1	0.520868	0.00725689
GO_slim_PIR.response_to_stimulus	1.01901e-06	27	7568	HSPA9;RPS15A;CLIC5;PRDX5;VDAC1;PGAM2;CPS1;STX11;DYNLL1;CAD;PRDX3;PSMD8;ADSL;ZAP70;ALOX15;IGFBP1;ARHGDIA;ACTN1;PIGR;LASP1;VAV1;GNB1;CUL1;CAPZA1;LGALS1;ACTR2;LIPG	0.00263704	0.00356765
GO_slim_PIR.ribosome	0.0425129	2	192	RPS15A;RPL31	1	0.0104167
GO_slim_PIR.vesicle	1.45682e-10	23	3485	HSPA9;RPS15A;CLIC5;PRDX5;VDAC1;RPL31;PGAM2;STX11;DYNLL1;CAD;PRDX3;PSMD8;ARHGDIA;ACTN1;PIGR;LASP1;PPIC;GNB1;CAPZA1;PGK1;LGALS1;CORO7;ACTR2	1.508e-06	0.00659971
GO_slim_PIR.vesicle_mediated_transport	0.00140925	8	1319	STX11;ALOX15;ACTN1;PIGR;VAV1;CORO7;ACTR2;LIPG	0.286032	0.0060652
GO_slim_PIR.viral_process	2.91162e-05	8	747	RPS15A;VDAC1;RPL31;SET;DYNLL1;PSMD8;CUL1;LGALS1	0.0268979	0.0107095
GO.'de_novo'_pyrimidine_nucleobase_biosynthetic_process	4.23828e-05	2	6	CPS1;CAD	0.0315543	0.333333
GO.actin_cytoskeleton	0.00553184	3	211	CLIC5;CAPZA1;ACTR2	0.504007	0.014218
GO.actin_filament_binding	5.08508e-05	4	120	ACTN1;LASP1;CAPZA1;ACTR2	0.0350916	0.0333333
GO.anaphase_promoting_complex_dependent_proteasomal_ubiquitin_dependent_protein_catabolic_process	0.00844924	2	81	PSMD8;CUL1	0.593626	0.0246914
GO.apoptotic_process	0.000503178	6	605	PRDX5;VDAC1;DYNLL1;PRDX3;PSMD8;LGALS1	0.177673	0.00991736
GO.arginine_biosynthetic_process	1.69896e-05	2	4	CPS1;CAD	0.0195405	0.5
GO.ATP_binding	0.0333765	6	1440	HSPA9;CPS1;CAD;ZAP70;PGK1;ACTR2	1	0.00416667
GO.blood_coagulation	0.00785836	4	465	ACTN1;VAV1;GNB1;CAPZA1	0.590269	0.00860215
GO.canonical_glycolysis	0.00096968	2	27	PGAM2;PGK1	0.238988	0.0740741
GO.carbamoyl_phosphate_synthase_(ammonia)_activity	2.83768e-06	2	2	CPS1;CAD	0.00550758	1
GO.carbamoyl_phosphate_synthase_(glutamine_hydrolyzing)_activity	2.83768e-06	2	2	CPS1;CAD	0.00550758	1
GO.cell_cell_junction	0.000137263	4	155	ZAP70;ACTN1;VAV1;CAPZA1	0.0761171	0.0258065
GO.cell_projection	0.000169078	3	63	CAD;ACTN1;ACTR2	0.0875092	0.047619
GO.cell_proliferation	0.0205116	3	343	GNB1;CUL1;LIPG	1	0.00874636
GO.cellular_nitrogen_compound_metabolic_process	0.0393654	2	184	CPS1;PSMD8	1	0.0108696
GO.cellular_protein_metabolic_process	0.0214647	4	627	HSPA9;RPS15A;RPL31;IGFBP1	1	0.00637959
GO.cellular_response_to_glucagon_stimulus	0.00191939	2	38	CPS1;GNB1	0.340599	0.0526316
GO.cellular_response_to_organic_cyclic_compound	0.00317327	2	49	ARHGDIA;LGALS1	0.454114	0.0408163
GO.cellular_response_to_reactive_oxygen_species	0.000426777	2	18	PRDX5;PRDX3	0.169912	0.111111
GO.cysteine_type_endopeptidase_inhibitor_activity_involved_in_apoptotic_process	0.000830564	2	25	PRDX5;PRDX3	0.216742	0.08
GO.cytoplasm	0.0210206	14	4803	HSPA9;RPS15A;PRDX5;SET;CPS1;DYNLL1;CAD;PRDX3;ZAP70;ARHGDIA;ACTN1;PPIC;LGALS1;ACTR2	1	0.00291484
GO.cytosol	7.33378e-10	21	3016	RPS15A;PRDX5;RPL31;PGAM2;SET;DYNLL1;CAD;PRDX3;PSMD8;ADSL;ZAP70;ALOX15;ARHGDIA;ACTN1;VAV1;GNB1;CUL1;CAPZA1;PGK1;CORO7;ACTR2	3.79572e-06	0.00696286
GO.early_endosome	0.044934	2	198	PRDX3;LIPG	1	0.010101
GO.epidermal_growth_factor_receptor_signaling_pathway	0.0429128	2	193	PIGR;VAV1	1	0.0103627
GO.epithelial_cell_differentiation	0.00672975	2	72	VDAC1;PGK1	0.560283	0.0277778
GO.extracellular_exosome	6.19999e-11	21	2649	HSPA9;RPS15A;CLIC5;PRDX5;VDAC1;RPL31;PGAM2;DYNLL1;CAD;PRDX3;PSMD8;ARHGDIA;ACTN1;PIGR;LASP1;PPIC;GNB1;CAPZA1;PGK1;LGALS1;ACTR2	1.05748e-06	0.00792752
GO.extracellular_space	0.0034762	7	1189	PRDX5;IGFBP1;ARHGDIA;ACTN1;PIGR;LGALS1;LIPG	0.466564	0.0058873
GO.extrinsic_component_of_cytoplasmic_side_of_plasma_membrane	0.00487512	2	61	ZAP70;ALOX15	0.477577	0.0327869
GO.Fc_gamma_receptor_signaling_pathway_involved_in_phagocytosis	0.00654979	2	71	VAV1;ACTR2	0.551212	0.028169
GO.female_pregnancy	0.00990848	2	88	CLIC5;CAD	0.64372	0.0227273
GO.focal_adhesion	0.000459064	5	384	HSPA9;RPL31;ACTN1;LASP1;ACTR2	0.174076	0.0130208
GO.G1/S_transition_of_mitotic_cell_cycle	0.0284322	2	154	PSMD8;CUL1	1	0.012987
GO.G2/M_transition_of_mitotic_cell_cycle	0.0235171	2	139	DYNLL1;CUL1	1	0.0143885
GO.gene_expression	0.0119107	5	816	RPS15A;PRDX5;RPL31;SET;PSMD8	0.745849	0.00612745
GO.gluconeogenesis	0.00292317	2	47	PGAM2;PGK1	0.426362	0.0425532
GO.glucose_metabolic_process	0.019287	2	125	PGAM2;PGK1	0.975899	0.016
GO.glutamine_metabolic_process	0.000528849	2	20	CPS1;CAD	0.182477	0.1
GO.hydrogen_peroxide_catabolic_process	0.000476475	2	19	PRDX5;PRDX3	0.174076	0.105263
GO.immunological_synapse	0.00127913	2	31	ZAP70;ARHGDIA	0.27214	0.0645161
GO.innate_immune_response	0.00136723	6	733	PSMD8;ZAP70;VAV1;CUL1;CAPZA1;ACTR2	0.283052	0.00818554
GO.intrinsic_apoptotic_signaling_pathway	0.00456784	2	59	DYNLL1;CUL1	0.466564	0.0338983
GO.membrane	0.000553302	11	2122	RPS15A;VDAC1;RPL31;DYNLL1;CAD;ALOX15;GNB1;CAPZA1;PGK1;CORO7;ACTR2	0.18279	0.00518379
GO.membrane_raft	0.0393654	2	184	ZAP70;PGK1	1	0.0108696
GO.mitochondrial_matrix	0.0105362	3	267	PRDX5;CPS1;PRDX3	0.67462	0.011236
GO.mitochondrial_nucleoid	4.00174e-05	3	39	HSPA9;VDAC1;CPS1	0.0315543	0.0769231
GO.mitochondrion	0.0161401	6	1220	HSPA9;PRDX5;VDAC1;DYNLL1;PRDX3;ADSL	0.870318	0.00491803
GO.mitotic_cell_cycle	0.0046425	4	400	SET;DYNLL1;PSMD8;CUL1	0.466564	0.01
GO.movement_of_cell_or_subcellular_component	0.000409876	3	85	ARHGDIA;CAPZA1;ACTR2	0.165303	0.0352941
GO.myelin_sheath	0.00011485	4	148	HSPA9;VDAC1;PRDX3;GNB1	0.0648465	0.027027
GO.negative_regulation_of_apoptotic_process	0.00121839	5	477	HSPA9;PRDX5;PRDX3;PSMD8;ARHGDIA	0.27214	0.0104822
GO.negative_regulation_of_cysteine_type_endopeptidase_activity_involved_in_apoptotic_process	0.00709637	2	74	PRDX5;PRDX3	0.575764	0.027027
GO.nuclear_transcribed_mRNA_catabolic_process_nonsense_mediated_decay	0.0167585	2	116	RPS15A;RPL31	0.889409	0.0172414
GO.nucleobase_containing_small_molecule_metabolic_process	0.00785626	2	78	CAD;ADSL	0.590269	0.025641
GO.platelet_activation	0.00538777	3	209	ACTN1;VAV1;GNB1	0.504007	0.0143541
GO.positive_regulation_of_ubiquitin_protein_ligase_activity_involved_in_regulation_of_mitotic_cell_cycle_transition	0.00654979	2	71	PSMD8;CUL1	0.551212	0.028169
GO.programmed_cell_death	0.029807	2	158	DYNLL1;PSMD8	1	0.0126582
GO.protein_binding	0.0143831	21	8289	HSPA9;CLIC5;VDAC1;SET;CPS1;STX11;DYNLL1;PRDX3;ZAP70;ALOX15;ARHGDIA;ACTN1;LASP1;PPIC;VAV1;GNB1;CUL1;CAPZA1;PGK1;LGALS1;CORO7	0.816677	0.00253348
GO.protein_C_terminus_binding	0.037827	2	180	DYNLL1;PRDX3	1	0.0111111
GO.protein_complex	0.0180962	3	327	SET;CPS1;CAD	0.932874	0.00917431
GO.protein_complex_binding	0.00510652	3	205	VDAC1;CPS1;GNB1	0.489438	0.0146341
GO.protein_folding	0.0322759	2	165	HSPA9;PPIC	1	0.0121212
GO.protein_kinase_binding	0.0221077	3	353	VDAC1;PRDX3;ARHGDIA	1	0.00849858
GO.regulation_of_apoptotic_process	0.0071011	3	231	PSMD8;ACTN1;LGALS1	0.575764	0.012987
GO.regulation_of_small_GTPase_mediated_signal_transduction	0.0216609	2	133	ARHGDIA;VAV1	1	0.0150376
GO.regulation_of_ubiquitin_protein_ligase_activity_involved_in_mitotic_cell_cycle	0.00728303	2	75	PSMD8;CUL1	0.579916	0.0266667
GO.response_to_amine	0.000154572	2	11	CPS1;CAD	0.0842121	0.181818
GO.response_to_lipopolysaccharide	0.0257628	2	146	CPS1;PRDX3	1	0.0136986
GO.response_to_nutrient	0.00728303	2	75	ADSL;LIPG	0.579916	0.0266667
GO.response_to_oxidative_stress	0.0146412	2	108	PRDX5;PRDX3	0.825168	0.0185185
GO.response_to_reactive_oxygen_species	0.00153826	2	34	PRDX5;PRDX3	0.302336	0.0588235
GO.response_to_starvation	0.00182032	2	37	CPS1;ADSL	0.334486	0.0540541
GO.response_to_toxic_substance	0.00844924	2	81	HSPA9;CPS1	0.593626	0.0246914
GO.ribosome	0.0210565	2	131	RPS15A;RPL31	1	0.0152672
GO.signal_transducer_activity	0.0453424	2	199	GNB1;LGALS1	1	0.0100503
GO.small_GTPase_mediated_signal_transduction	0.0414987	3	452	ARHGDIA;VAV1;ACTR2	1	0.00663717
GO.small_molecule_metabolic_process	0.00246141	8	1440	PGAM2;CPS1;CAD;PSMD8;ADSL;ALOX15;GNB1;PGK1	0.402298	0.00555556
GO.SRP_dependent_cotranslational_protein_targeting_to_membrane	0.0141315	2	106	RPS15A;RPL31	0.808174	0.0188679
GO.stimulatory_C_type_lectin_receptor_signaling_pathway	0.0175843	2	119	PSMD8;CUL1	0.91468	0.0168067
GO.structural_constituent_of_ribosome	0.0301548	2	159	RPS15A;RPL31	1	0.0125786
GO.T_cell_activation	0.00268282	2	45	ZAP70;VAV1	0.410406	0.0444444
GO.T_cell_costimulation	0.00637208	2	70	VAV1;LGALS1	0.542133	0.0285714
GO.translational_elongation	0.0126502	2	100	RPS15A;RPL31	0.774829	0.02
GO.translational_initiation	0.0228913	2	137	RPS15A;RPL31	1	0.0145985
GO.translational_termination	0.00990848	2	88	RPS15A;RPL31	0.64372	0.0227273
GO.urea_cycle	0.000185288	2	12	CPS1;CAD	0.0943268	0.166667
GO.viral_life_cycle	0.0247899	2	143	RPS15A;RPL31	1	0.013986
GO.viral_process	3.31164e-05	7	549	RPS15A;VDAC1;RPL31;SET;DYNLL1;PSMD8;CUL1	0.0285666	0.0127505
GO.viral_transcription	0.0146412	2	108	RPS15A;RPL31	0.825168	0.0185185
