# Supplementary material for: Sympathetic nociceptive afferent signaling drives the chronic structural and functional autonomic remodeling after myocardial infarction
Source: Research Square preprint supplement (doi:10.21203/rs.3.rs-6247307/v1), 2025-03-31
Supplement: Supplementary file 3 [file de08c8e99eef3e61867256eb.xlsx]

## Sheet: Sheet1
Protein ID	Gene Name	epidural cRTX_vs_sham_log2 fold change	epidural cRTX_vs_sham only_p.val	epidural cRTX_vs_sham_p.adj	significant	epidural cRTX_vs_sham_significant	imputed	num_NAs
A0A287ADJ2	HSPA9	-3.77	0.0163	0.000751	TRUE	TRUE	FALSE	17
A0A287ADE6	RPS15A	-3.39	0.0189	0.0277	TRUE	TRUE	FALSE	16
A0A287AN23	CLIC5	-2.89	0.00822	0.000736	TRUE	TRUE	FALSE	16
A0A287BKE2	NDRG1	-2.88	0.0893	0.533	FALSE	FALSE	FALSE	15
A0A8D1L3X4	PRDX5	-2.8	0.037	0.0517	FALSE	FALSE	FALSE	17
Q9MZ16	VDAC1	-2.78	0.0491	0.242	FALSE	FALSE	FALSE	16
P62901	RPL31	-2.75	0.0385	0.057	FALSE	FALSE	FALSE	17
B5KJG2	PGAM2	-2.66	0.0423	0.0787	FALSE	FALSE	FALSE	17
F1RR69	SET	-2.61	0.0443	0.0905	FALSE	FALSE	FALSE	17
A0A287B4L9	CPS1	-2.56	0.00842	0.00596	TRUE	TRUE	FALSE	15
A0A4X1TFR5	RPS13	-2.37	0.339	0.909	FALSE	FALSE	FALSE	16
Q6SA96	RPS23	-2.25	0.0641	0.228	FALSE	FALSE	FALSE	17
A0A5G2QFP2	HDGF	-2.18	0.0694	0.261	FALSE	FALSE	FALSE	17
A0A8W4FNF1	A0A8W4FNF1	-1.99	0.0842	0.428	FALSE	FALSE	FALSE	16
P54613	PPP2R1B	-1.97	0.0875	0.337	FALSE	FALSE	FALSE	17
I3LGN8	PKP1	-1.96	0.0506	0.311	FALSE	FALSE	FALSE	15
A0A287B386	RPL17	-1.92	0.0935	0.364	FALSE	FALSE	FALSE	17
F1S731	STX11	-1.92	0.0154	0.181	FALSE	FALSE	FALSE	10
F1SMN5	FLNC	-1.92	0.237	0.868	FALSE	FALSE	FALSE	14
A0A287ASZ5	SRSF7	-1.91	0.0941	0.367	FALSE	FALSE	FALSE	17
F2Z5F5	RPS8	-1.91	0.268	0.882	FALSE	FALSE	FALSE	15
A0A287BEI1	KRT77	-1.87	0.306	0.9	FALSE	FALSE	FALSE	15
D9U8D1	DYNLL1	-1.84	0.0374	0.148	FALSE	FALSE	FALSE	16
F1S5Q5	SCGB3A1	-1.8	0.0535	0.451	FALSE	FALSE	FALSE	11
F1SCG1	PKN1	-1.77	0.0526	0.265	FALSE	FALSE	FALSE	16
I3LLT2	CAD	-1.72	0.0463	0.221	FALSE	FALSE	FALSE	16
A0A5G2QKD9	PRDX3	-1.67	0.000859	0.00339	TRUE	TRUE	FALSE	7
A0A5G2QUN4	PSAT1	-1.67	0.0912	0.471	FALSE	FALSE	FALSE	16
A0A8W4FLZ3	TPM2	-1.62	0.227	0.861	FALSE	FALSE	FALSE	14
A0A287B5Q7	PSMD8	-1.61	0.0116	0.0428	TRUE	TRUE	FALSE	14
P67776	PPP2CA	-1.6	0.314	0.899	FALSE	FALSE	FALSE	16
A0A287A5A2	TGFB1I1	-1.55	0.145	0.637	FALSE	FALSE	FALSE	17
A0A5G2QTY6	PAICS	-1.53	0.15	0.718	FALSE	FALSE	FALSE	16
Q29048	ATP6V1A	-1.53	0.307	0.904	FALSE	FALSE	FALSE	14
F1SA74	MTHFD1	-1.52	0.128	0.694	FALSE	FALSE	FALSE	15
A0A4X1U2C1	TMED5	-1.51	0.154	0.669	FALSE	FALSE	FALSE	17
F1S454	LOC100522551	-1.51	0.0184	0.172	FALSE	FALSE	FALSE	12
A0A4X1V1H9	NDUFS1	-1.5	0.0689	0.338	FALSE	FALSE	FALSE	16
F1SNL7	CNDP2	-1.49	0.123	0.759	FALSE	FALSE	FALSE	9
A0A287ATE3	A0A287ATE3	-1.48	0.206	0.862	FALSE	FALSE	FALSE	8
F1RJ12	PPP1R3D	-1.48	0.22	0.849	FALSE	FALSE	FALSE	15
A0A8W4FH88	XPO5	-1.47	0.119	0.617	FALSE	FALSE	FALSE	16
A0A8W4F877	ADSL	-1.45	0.0318	0.179	FALSE	FALSE	FALSE	15
A0A5G2QPW8	JMJD6	-1.44	0.142	0.696	FALSE	FALSE	FALSE	16
F1STD6	ZAP70	-1.43	0.0256	0.176	FALSE	FALSE	FALSE	14
A8U4R4	TKT	-1.42	0.15	0.719	FALSE	FALSE	FALSE	16
A0A480M584	PLOD1	-1.41	0.176	0.731	FALSE	FALSE	FALSE	17
F1S848	NT5C2	-1.41	0.221	0.837	FALSE	FALSE	FALSE	16
Q29205	RPL11	-1.39	0.457	0.941	FALSE	FALSE	FALSE	12
F1SNE9	COPG2	-1.38	0.2	0.813	FALSE	FALSE	FALSE	16
P00506	GOT2	-1.37	0.205	0.834	FALSE	FALSE	FALSE	15
A0A8W4FJM1	YKT6	-1.36	0.0811	0.594	FALSE	FALSE	FALSE	12
P42174	GLUD1	-1.34	0.0862	0.563	FALSE	FALSE	FALSE	14
A0A287APR1	RPL18A	-1.33	0.143	0.7	FALSE	FALSE	FALSE	16
A1XQU5	RPL27	-1.31	0.357	0.92	FALSE	FALSE	FALSE	14
A0A8D0NPF0	ACLY	-1.29	0.139	0.771	FALSE	FALSE	FALSE	12
F1SMZ6	HSPE1	-1.29	0.336	0.912	FALSE	FALSE	FALSE	15
A0A287ANU5	A0A287ANU5	-1.27	0.528	0.948	FALSE	FALSE	FALSE	15
A0A5G2RBV3	UMPS	-1.26	0.214	0.803	FALSE	FALSE	FALSE	17
F2Z543	PHB1	-1.25	0.159	0.769	FALSE	FALSE	FALSE	15
A0A287BDV3	A0A287BDV3	-1.23	0.22	0.867	FALSE	FALSE	FALSE	11
F6PXD5	GPSM3	-1.22	0.104	0.606	FALSE	FALSE	FALSE	15
P16469	ALOX15	-1.21	0.0303	0.285	FALSE	FALSE	FALSE	12
F1S2E2	ANXA11	-1.2	0.352	0.913	FALSE	FALSE	FALSE	16
I3LRZ4	PPFIBP1	-1.2	0.437	0.936	FALSE	FALSE	FALSE	15
F1S3Q8	VNN3	-1.19	0.264	0.88	FALSE	FALSE	FALSE	15
F1SD78	MRI1	-1.19	0.0594	0.437	FALSE	FALSE	FALSE	13
Q3YLA6	SRSF1	-1.19	0.232	0.828	FALSE	FALSE	FALSE	17
Q75ZP3	IGFBP1	-1.16	0.0187	0.303	FALSE	FALSE	FALSE	0
A0A4X1TIZ3	SDSL	-1.15	0.246	0.842	FALSE	FALSE	FALSE	17
A0A5G2QSE8	KRT3	-1.15	0.268	0.896	FALSE	FALSE	FALSE	9
F1RN71	BLMH	-1.15	0.147	0.764	FALSE	FALSE	FALSE	14
A0A4X1SWN4	PAFAH1B2	-1.14	0.253	0.865	FALSE	FALSE	FALSE	16
F1RFB1	PKD1	-1.1	0.149	0.779	FALSE	FALSE	FALSE	13
A0A075B7I6	A0A075B7I6	-1.09	0.28	0.905	FALSE	FALSE	FALSE	0
F1SUK6	CAPN5	-1.09	0.218	0.859	FALSE	FALSE	FALSE	13
Q19S50	STAT3	-1.09	0.319	0.902	FALSE	FALSE	FALSE	16
A0A287A959	DDR1	-1.08	0.166	0.796	FALSE	FALSE	FALSE	14
A0A8D1S998	RPL4	-1.08	0.357	0.923	FALSE	FALSE	FALSE	10
F1RMJ9	OSBP	-1.08	0.199	0.837	FALSE	FALSE	FALSE	14
Q85ZW4	SLA-DRA1	-1.07	0.00442	0.034	TRUE	TRUE	FALSE	10
A0A286ZUB0	MGLL	-1.07	0.111	0.637	FALSE	FALSE	FALSE	15
Q29183	TFF3	-1.07	0.157	0.737	FALSE	FALSE	FALSE	16
A0A4X1UI84	GNPDA2	-1.05	0.28	0.871	FALSE	FALSE	FALSE	17
A0A5G2QIU0	CSF1R	-1.04	0.148	0.746	FALSE	FALSE	FALSE	15
F1SU77	PLA2G12B	-1.02	0.277	0.896	FALSE	FALSE	FALSE	12
E7EI20	ARHGDIA	-1.01	0.0442	0.337	FALSE	FALSE	FALSE	13
A0A5G2QQ79	BCL2L13	-1	0.0799	0.62	FALSE	FALSE	FALSE	10
A0A480V822	PUF60	-0.998	0.0607	0.407	FALSE	FALSE	FALSE	14
A0A287AEC1	MOB1A	-0.994	0.118	0.725	FALSE	FALSE	FALSE	12
Q95342	RPL18	-0.986	0.267	0.891	FALSE	FALSE	FALSE	12
Q29371	TPI1	-0.975	0.303	0.907	FALSE	FALSE	FALSE	11
I3LLY3	ACTN1	-0.964	0.0328	0.394	FALSE	FALSE	FALSE	2
F1S6Z2	REPS1	-0.963	0.316	0.892	FALSE	FALSE	FALSE	17
A0A075B7I5	A0A075B7I5	-0.956	0.108	0.754	FALSE	FALSE	FALSE	0
P62936	PPIA	-0.956	0.0833	0.676	FALSE	FALSE	FALSE	4
F1S880	NSFL1C	-0.955	0.16	0.786	FALSE	FALSE	FALSE	14
P61292	PPP1CB	-0.941	0.239	0.854	FALSE	FALSE	FALSE	16
A0A287B644	PIGR	-0.939	0.00482	0.101	FALSE	FALSE	FALSE	0
A0A5G2QWV6	CAVIN3	-0.938	0.0405	0.321	FALSE	FALSE	FALSE	13
M3VJZ7	LASP1	-0.937	0.0398	0.368	FALSE	FALSE	FALSE	10
A0A287BJ88	BTF3	-0.929	0.704	0.963	FALSE	FALSE	FALSE	16
A0A287ARI1	EIF3F	-0.915	0.0868	0.62	FALSE	FALSE	FALSE	12
Q764N2	CD3D	-0.909	0.0651	0.527	FALSE	FALSE	FALSE	11
A0A8W4FEK6	A0A8W4FEK6	-0.9	0.0302	0.382	FALSE	FALSE	FALSE	0
A0A287B5I6	CD46	-0.895	0.29	0.888	FALSE	FALSE	FALSE	16
A0A287A8C7	PLEC	-0.894	0.0684	0.564	FALSE	FALSE	FALSE	10
A0A286ZP11	LOC110258323	-0.887	0.00352	0.0422	FALSE	FALSE	FALSE	7
A0A287AEA2	PPIC	-0.881	0.0354	0.315	FALSE	FALSE	FALSE	12
F1RXC2	CA2	-0.877	0.354	0.909	FALSE	FALSE	FALSE	17
A0A287AA47	GCLM	-0.876	0.352	0.921	FALSE	FALSE	FALSE	11
I3L5F8	TXNDC15	-0.875	0.0924	0.669	FALSE	FALSE	FALSE	10
A0A287AAX1	PCDHAC2	-0.872	0.0252	0.319	FALSE	FALSE	FALSE	6
A0A4X1VA68	SCARA5	-0.868	0.058	0.501	FALSE	FALSE	FALSE	10
A0A5G2R9R9	SEPTIN9	-0.859	0.288	0.899	FALSE	FALSE	FALSE	13
A0A480VIL3	NAXD	-0.849	0.145	0.759	FALSE	FALSE	FALSE	14
F1RGC0	RPL27A	-0.844	0.453	0.937	FALSE	FALSE	FALSE	16
A0A5G2QQH9	SIRT2	-0.842	0.226	0.861	FALSE	FALSE	FALSE	14
Q28942	FCGR3A	-0.838	0.223	0.851	FALSE	FALSE	FALSE	15
F1SEY9	FCMR	-0.827	0.0358	0.389	FALSE	FALSE	FALSE	6
A0A286ZQX2	VAV1	-0.823	0.0405	0.338	FALSE	FALSE	FALSE	12
A0A480JRG6	TSKU	-0.81	0.0897	0.7	FALSE	FALSE	FALSE	3
A0A5K1U589	UBA1	-0.805	0.293	0.904	FALSE	FALSE	FALSE	10
A0A5G2RGK0	PURA	-0.803	0.269	0.887	FALSE	FALSE	FALSE	14
P50578	AKR1A1	-0.801	0.512	0.946	FALSE	FALSE	FALSE	16
A0A4X1VV05	TAGLN2	-0.794	0.337	0.917	FALSE	FALSE	FALSE	12
A0A8W4F8U6	A0A8W4F8U6	-0.793	0.0375	0.442	FALSE	FALSE	FALSE	0
A0A8D0VIH6	MYL1	-0.792	0.219	0.875	FALSE	FALSE	FALSE	3
A0A8W4FEI6	CYFIP1	-0.792	0.397	0.922	FALSE	FALSE	FALSE	17
P20461	EIF2S3	-0.78	0.585	0.955	FALSE	FALSE	FALSE	12
A0A287AE54	HK3	-0.772	0.125	0.762	FALSE	FALSE	FALSE	9
A0A5G2QXM7	RAB6A	-0.769	0.253	0.882	FALSE	FALSE	FALSE	13
F1RST0	HSPH1	-0.767	0.199	0.843	FALSE	FALSE	FALSE	13
F1RRX4	LCP2	-0.765	0.0753	0.62	FALSE	FALSE	FALSE	8
G9K122	MRC1	-0.758	0.0672	0.581	FALSE	FALSE	FALSE	8
A0A287BP58	LOC102166306	-0.754	0.0799	0.648	FALSE	FALSE	FALSE	7
A0A286ZYY3	CCAR1	-0.751	0.228	0.866	FALSE	FALSE	FALSE	13
A0A5G2QGE1	PCBP2	-0.746	0.298	0.904	FALSE	FALSE	FALSE	12
A0A286ZWS0	SH3BGRL3	-0.744	0.115	0.726	FALSE	FALSE	FALSE	11
A0A480ZCU6	SPR	-0.739	0.231	0.876	FALSE	FALSE	FALSE	10
I3LNC5	LPXN	-0.739	0.227	0.871	FALSE	FALSE	FALSE	11
P23695	IGF2	-0.726	0.147	0.815	FALSE	FALSE	FALSE	1
P19620	ANXA2	-0.723	0.238	0.884	FALSE	FALSE	FALSE	6
A0A4X1W8E1	GNB1	-0.718	0.0266	0.335	FALSE	FALSE	FALSE	4
A0A4X1UR52	CUL1	-0.715	0.0441	0.419	FALSE	FALSE	FALSE	9
A0A287AXI5	IFI6	-0.709	0.138	0.804	FALSE	FALSE	FALSE	0
I3LA44	NRBP1	-0.709	0.0648	0.568	FALSE	FALSE	FALSE	8
F1SIB6	LRP4	-0.707	0.2	0.848	FALSE	FALSE	FALSE	12
C6L245	try	-0.703	0.263	0.879	FALSE	FALSE	FALSE	15
F1RPY3	RTN3	-0.702	0.311	0.903	FALSE	FALSE	FALSE	15
O19062	CRP	-0.697	0.0884	0.704	FALSE	FALSE	FALSE	0
A0A286ZPM8	SCPEP1	-0.687	0.251	0.881	FALSE	FALSE	FALSE	13
F1RX66	GSR	-0.682	0.058	0.501	FALSE	FALSE	FALSE	10
F1RQZ0	GRN	-0.679	0.205	0.868	FALSE	FALSE	FALSE	1
A0A480IRZ7	SORT1	-0.675	0.209	0.859	FALSE	FALSE	FALSE	11
A0A8W4F9H3	LOC100158011	-0.674	0.12	0.776	FALSE	FALSE	FALSE	0
Q52N47	ITM2B	-0.666	0.172	0.82	FALSE	FALSE	FALSE	12
A0A287BCE6	FCGBP	-0.66	0.199	0.864	FALSE	FALSE	FALSE	0
F1S501	F1S501	-0.653	0.222	0.872	FALSE	FALSE	FALSE	9
I3L9I6	BCAM	-0.651	0.339	0.912	FALSE	FALSE	FALSE	15
A0A286ZP41	PGC	-0.65	0.0837	0.662	FALSE	FALSE	FALSE	7
A0A287BN15	LOC110255312	-0.65	0.387	0.931	FALSE	FALSE	FALSE	3
A0A287B9M9	EIF4G1	-0.645	0.0679	0.613	FALSE	FALSE	FALSE	4
A0A287BEJ2	BABAM2	-0.644	0.441	0.935	FALSE	FALSE	FALSE	16
I3L629	LOC100519130	-0.644	0.32	0.915	FALSE	FALSE	FALSE	6
A0A287ANQ8	LOC100625180	-0.633	0.197	0.862	FALSE	FALSE	FALSE	1
F1SGI7	KRT75	-0.632	0.453	0.942	FALSE	FALSE	FALSE	0
F1RUZ1	PTPRCAP	-0.627	0.313	0.91	FALSE	FALSE	FALSE	11
F1S1M2	SYTL4	-0.626	0.493	0.942	FALSE	FALSE	FALSE	17
A0A480HEF9	FKBP10	-0.621	0.451	0.937	FALSE	FALSE	FALSE	16
F1SAJ9	MAPRE2	-0.621	0.221	0.875	FALSE	FALSE	FALSE	6
Q8SPS7	HP	-0.621	0.447	0.941	FALSE	FALSE	FALSE	1
A0A5G2QGG1	GKN2	-0.618	0.396	0.928	FALSE	FALSE	FALSE	15
A0A8W4FLH7	MS4A1	-0.61	0.193	0.848	FALSE	FALSE	FALSE	10
A0A287BD00	RAB1A	-0.609	0.164	0.829	FALSE	FALSE	FALSE	6
A0A8W4FHQ3	A0A8W4FHQ3	-0.609	0.0983	0.731	FALSE	FALSE	FALSE	0
F1SDQ7	MATN4	-0.609	0.504	0.943	FALSE	FALSE	FALSE	17
P83686	CYB5R3	-0.608	0.495	0.943	FALSE	FALSE	FALSE	16
A0PFK5	CAPZA1	-0.606	0.029	0.338	FALSE	FALSE	FALSE	6
Q7SIB7	PGK1	-0.605	0.0431	0.481	FALSE	FALSE	FALSE	1
F1S5F1	PTPRC	-0.604	0.155	0.802	FALSE	FALSE	FALSE	11
Q49I35	LGALS1	-0.603	0.0114	0.226	FALSE	FALSE	FALSE	0
A0A4X1SEC1	CTSS	-0.6	0.463	0.941	FALSE	FALSE	FALSE	14
F2Z5G5	ACTR1A	-0.595	0.511	0.947	FALSE	FALSE	FALSE	15
A0A286ZXU2	FLNA	-0.594	0.259	0.896	FALSE	FALSE	FALSE	0
A0A287BAK1	TLN1	-0.593	0.169	0.84	FALSE	FALSE	FALSE	0
Q29041	FCN2	-0.593	0.0644	0.613	FALSE	FALSE	FALSE	0
F1STC2	F1STC2	-0.589	0.344	0.923	FALSE	FALSE	FALSE	0
F1SGF1	PSMD6	-0.586	0.367	0.927	FALSE	FALSE	FALSE	6
A0A4X1U700	RPL12	-0.582	0.351	0.923	FALSE	FALSE	FALSE	8
A0A8W4F7N5	A0A8W4F7N5	-0.582	0.185	0.853	FALSE	FALSE	FALSE	1
A0A8W4FCU2	MYH9	-0.581	0.264	0.898	FALSE	FALSE	FALSE	0
P20460	EIF2S1	-0.579	0.23	0.88	FALSE	FALSE	FALSE	5
A0A287ATU4	TNPO1	-0.569	0.236	0.872	FALSE	FALSE	FALSE	13
A0A5G2R8I5	CORO7	-0.569	0.0481	0.511	FALSE	FALSE	FALSE	2
A0A5G2RDZ2	SLC25A6	-0.569	0.67	0.961	FALSE	FALSE	FALSE	13
F1RZ92	PCSK6	-0.569	0.324	0.915	FALSE	FALSE	FALSE	9
I3L6U3	I3L6U3	-0.569	0.181	0.844	FALSE	FALSE	FALSE	7
F1SII4	GARS1	-0.568	0.345	0.92	FALSE	FALSE	FALSE	10
A0A8W4FCP5	A0A8W4FCP5	-0.565	0.445	0.936	FALSE	FALSE	FALSE	16
F2Z5S4	LSM3	-0.562	0.381	0.929	FALSE	FALSE	FALSE	8
Q0R678	PARK7	-0.562	0.184	0.843	FALSE	FALSE	FALSE	9
A0A287AY35	ETFA	-0.559	0.538	0.948	FALSE	FALSE	FALSE	17
B7TY22	GP9	-0.559	0.375	0.929	FALSE	FALSE	FALSE	6
P42639	TPM1	-0.555	0.593	0.956	FALSE	FALSE	FALSE	12
A0A4X1SLJ1	RPS25	-0.553	0.492	0.945	FALSE	FALSE	FALSE	13
B5APU8	ARPC3	-0.55	0.142	0.8	FALSE	FALSE	FALSE	6
P30034	PF4	-0.547	0.291	0.907	FALSE	FALSE	FALSE	3
A0A287BH28	A0A287BH28	-0.546	0.223	0.879	FALSE	FALSE	FALSE	0
A0A5G2RE71	ACTR2	-0.546	0.0207	0.314	FALSE	FALSE	FALSE	1
A0A287B5G0	A0A287B5G0	-0.544	0.356	0.926	FALSE	FALSE	FALSE	0
A0A287AK53	LOC110256483	-0.543	0.548	0.949	FALSE	FALSE	FALSE	17
F1RRS3	NSF	-0.543	0.314	0.908	FALSE	FALSE	FALSE	13
I3LUA0	LIPG	-0.542	0.0157	0.278	FALSE	FALSE	FALSE	0
A0A287AB52	MFAP4	-0.538	0.0748	0.658	FALSE	FALSE	FALSE	0
F1SHP1	ADAMTS1	-0.536	0.171	0.819	FALSE	FALSE	FALSE	12
A0A287BH63	LOC110255185	-0.534	0.129	0.79	FALSE	FALSE	FALSE	1
Q007T5	ARF6	-0.533	0.169	0.828	FALSE	FALSE	FALSE	9
K7GQ93	GPC3	-0.53	0.558	0.95	FALSE	FALSE	FALSE	17
A0A5G2RG07	CRP	-0.529	0.287	0.906	FALSE	FALSE	FALSE	3
A0A5G2QML3	H1-3	-0.519	0.441	0.94	FALSE	FALSE	FALSE	3
A0A287A9Y5	CD8A	-0.517	0.309	0.911	FALSE	FALSE	FALSE	8
A0A8W4FEL9	A0A8W4FEL9	-0.517	0.244	0.89	FALSE	FALSE	FALSE	0
A0A8W4FMG3	A0A8W4FMG3	-0.507	0.218	0.876	FALSE	FALSE	FALSE	0
F1RRT2	MYL4	-0.505	0.575	0.952	FALSE	FALSE	FALSE	17
A0A286ZMP2	RAB7A	-0.502	0.422	0.935	FALSE	FALSE	FALSE	12
Q4JH15	TNNI2	-0.501	0.586	0.955	FALSE	FALSE	FALSE	12
A0A286ZJE0	RIPOR2	-0.499	0.447	0.939	FALSE	FALSE	FALSE	12
A0A5G2R074	ELAC2	-0.498	0.144	0.81	FALSE	FALSE	FALSE	2
A0A286ZPT0	COPB2	-0.496	0.0278	0.341	FALSE	FALSE	FALSE	4
P80021	ATP5F1A	-0.496	0.316	0.915	FALSE	FALSE	FALSE	3
F1RFY1	PFN1	-0.495	0.176	0.847	FALSE	FALSE	FALSE	0
Q1KYT0	ENO3	-0.494	0.167	0.838	FALSE	FALSE	FALSE	0
A0A8D0MLF8	RPL13A	-0.493	0.572	0.953	FALSE	FALSE	FALSE	14
I3LVB2	MEGF6	-0.492	0.0884	0.699	FALSE	FALSE	FALSE	2
B7TY21	GP1BB	-0.489	0.348	0.924	FALSE	FALSE	FALSE	0
A0A287AK86	ITGB2	-0.485	0.0724	0.645	FALSE	FALSE	FALSE	1
F1RJY9	CD48	-0.483	0.269	0.892	FALSE	FALSE	FALSE	12
P10668	CFL1	-0.483	0.228	0.882	FALSE	FALSE	FALSE	0
Q75NG9	TNNT3	-0.483	0.288	0.903	FALSE	FALSE	FALSE	9
A0A4X1WBL9	CCT4	-0.481	0.275	0.901	FALSE	FALSE	FALSE	4
F1SQW0	PAK2	-0.481	0.521	0.949	FALSE	FALSE	FALSE	12
A0A287AL38	TPP2	-0.477	0.414	0.931	FALSE	FALSE	FALSE	15
O62787	SLC2A3	-0.477	0.594	0.956	FALSE	FALSE	FALSE	11
A0A8D0TG57	PPP1R7	-0.471	0.305	0.911	FALSE	FALSE	FALSE	6
A0A287AFE6	CD226	-0.467	0.429	0.935	FALSE	FALSE	FALSE	14
A0A480K0L3	GPC6	-0.466	0.529	0.95	FALSE	FALSE	FALSE	11
F1RUX1	CORO1B	-0.466	0.273	0.9	FALSE	FALSE	FALSE	6
P60662	MYL6	-0.462	0.36	0.926	FALSE	FALSE	FALSE	0
F1RN44	LAMP1	-0.457	0.0375	0.442	FALSE	FALSE	FALSE	0
A0A8X9AEQ6	ARPC5	-0.456	0.237	0.885	FALSE	FALSE	FALSE	4
F1RUT4	CTSF	-0.456	0.467	0.943	FALSE	FALSE	FALSE	9
F1RZP9	MICAL1	-0.455	0.444	0.937	FALSE	FALSE	FALSE	15
I3LI80	AVIL	-0.453	0.399	0.933	FALSE	FALSE	FALSE	5
P31950	S100A11	-0.451	0.238	0.878	FALSE	FALSE	FALSE	11
A0A8W4FB67	LOC110258648	-0.449	0.501	0.946	FALSE	FALSE	FALSE	14
I3LUS1	DCHS1	-0.449	0.2	0.86	FALSE	FALSE	FALSE	7
Q8WNW3	Jup	-0.449	0.342	0.922	FALSE	FALSE	FALSE	4
A0A287ANN1	ADAMTSL4	-0.448	0.158	0.826	FALSE	FALSE	FALSE	3
F1S4P6	EIF3A	-0.448	0.453	0.941	FALSE	FALSE	FALSE	10
A0A5G2R9V1	A0A5G2R9V1	-0.447	0.474	0.943	FALSE	FALSE	FALSE	11
A0A287B5Q4	RTN4	-0.444	0.669	0.96	FALSE	FALSE	FALSE	16
A0A8W4FC15	A0A8W4FC15	-0.443	0.254	0.894	FALSE	FALSE	FALSE	0
A0A8W4FMI6	A0A8W4FMI6	-0.443	0.64	0.96	FALSE	FALSE	FALSE	0
A0A5G2QA44	STXBP2	-0.44	0.37	0.925	FALSE	FALSE	FALSE	12
P32196	NPG3	-0.44	0.284	0.902	FALSE	FALSE	FALSE	9
Q6IEA3	ISG12(a)	-0.438	0.337	0.921	FALSE	FALSE	FALSE	2
F1SGG3	KRT1	-0.437	0.581	0.955	FALSE	FALSE	FALSE	0
F1RL04	PPM1F	-0.434	0.371	0.927	FALSE	FALSE	FALSE	8
Q9XSJ9	CD247	-0.428	0.186	0.849	FALSE	FALSE	FALSE	6
F1S5Z3	SARS1	-0.427	0.615	0.957	FALSE	FALSE	FALSE	14
I3LCC0	ARHGAP45	-0.427	0.199	0.862	FALSE	FALSE	FALSE	4
A0A286ZMU4	A0A286ZMU4	-0.424	0.312	0.913	FALSE	FALSE	FALSE	6
I3LBK9	DNAJC3	-0.421	0.228	0.88	FALSE	FALSE	FALSE	3
A0A4X1SWC8	PSMD12	-0.42	0.318	0.913	FALSE	FALSE	FALSE	9
E7D6R2	BHMT	-0.42	0.506	0.947	FALSE	FALSE	FALSE	13
A0A8D0WDE3	SUB1	-0.419	0.439	0.938	FALSE	FALSE	FALSE	11
A0A4X1VNN9	RPS9	-0.418	0.649	0.96	FALSE	FALSE	FALSE	13
A0A287A9L8	CNP	-0.414	0.441	0.938	FALSE	FALSE	FALSE	13
F1RQW7	C2	-0.414	0.0543	0.56	FALSE	FALSE	FALSE	0
O18796	IL6R	-0.414	0.388	0.93	FALSE	FALSE	FALSE	9
Q8HZW2	MYOC	-0.413	0.106	0.749	FALSE	FALSE	FALSE	0
I3LSU8	UBE2Z	-0.411	0.645	0.958	FALSE	FALSE	FALSE	17
A0A287BM53	RPL7A	-0.408	0.726	0.964	FALSE	FALSE	FALSE	16
I3LRT6	FKBP9	-0.408	0.147	0.814	FALSE	FALSE	FALSE	2
Q06AT6	RHOG	-0.408	0.13	0.791	FALSE	FALSE	FALSE	1
Q9GKY5	GHRL	-0.408	0.153	0.823	FALSE	FALSE	FALSE	0
A0A5G2Q9P8	ATF6	-0.407	0.522	0.948	FALSE	FALSE	FALSE	15
A0A287B310	STOM	-0.406	0.293	0.909	FALSE	FALSE	FALSE	0
A0A4X1VH23	RAB33B	-0.406	0.263	0.892	FALSE	FALSE	FALSE	10
K7GPU7	DIPK2B	-0.404	0.541	0.95	FALSE	FALSE	FALSE	15
Q64L94	PSME1	-0.403	0.25	0.891	FALSE	FALSE	FALSE	4
A0A287AWV7	BCAT1	-0.402	0.406	0.932	FALSE	FALSE	FALSE	13
A0A5G2RLP2	LGALS3BP	-0.399	0.134	0.799	FALSE	FALSE	FALSE	0
P80054	PR39	-0.399	0.111	0.76	FALSE	FALSE	FALSE	0
A0A287AL82	SEMA4B	-0.398	0.495	0.947	FALSE	FALSE	FALSE	8
Q710C4	AHCY	-0.398	0.227	0.877	FALSE	FALSE	FALSE	7
A0A287AHX7	CDHR5	-0.397	0.55	0.952	FALSE	FALSE	FALSE	12
A0A287BFY0	ALDOA	-0.397	0.179	0.848	FALSE	FALSE	FALSE	0
A0A287A976	COPS5	-0.396	0.276	0.898	FALSE	FALSE	FALSE	10
A0A8W4FNL6	G6PD	-0.392	0.837	0.969	FALSE	FALSE	FALSE	14
A0A5G2QEF4	PLIN5	-0.391	0.273	0.902	FALSE	FALSE	FALSE	0
A0A5G2QFI9	SAA3	-0.388	0.647	0.96	FALSE	FALSE	FALSE	12
F1SH33	SERPINI1	-0.388	0.0536	0.551	FALSE	FALSE	FALSE	1
P00346	MDH2	-0.388	0.599	0.956	FALSE	FALSE	FALSE	14
A0A286ZL80	ISM1	-0.387	0.593	0.955	FALSE	FALSE	FALSE	14
A0A287B238	NIF3L1	-0.387	0.446	0.939	FALSE	FALSE	FALSE	12
A0A5G2QM19	PEPD	-0.387	0.351	0.924	FALSE	FALSE	FALSE	0
A0A287BDS7	CORO1A	-0.386	0.15	0.82	FALSE	FALSE	FALSE	0
K9J4L8	PRKCB	-0.386	0.5	0.947	FALSE	FALSE	FALSE	11
P79335	SERPINE1	-0.382	0.668	0.96	FALSE	FALSE	FALSE	17
A0A287AJS7	A0A287AJS7	-0.38	0.285	0.904	FALSE	FALSE	FALSE	7
A0A8W4FLI0	PDLIM7	-0.38	0.718	0.963	FALSE	FALSE	FALSE	16
A0A8W4FCQ5	H1-2	-0.378	0.713	0.963	FALSE	FALSE	FALSE	14
Q08094	CNN2	-0.378	0.286	0.906	FALSE	FALSE	FALSE	3
A0A8D1KBT2	CLINT1	-0.377	0.672	0.96	FALSE	FALSE	FALSE	17
A0A287AH24	PDCD6IP	-0.376	0.49	0.945	FALSE	FALSE	FALSE	14
A0A481C371	VASP	-0.376	0.601	0.956	FALSE	FALSE	FALSE	10
Q6QAQ1	ACTB	-0.375	0.144	0.813	FALSE	FALSE	FALSE	0
P10173	FH	-0.374	0.623	0.958	FALSE	FALSE	FALSE	8
F1RRN0	PTK7	-0.373	0.086	0.684	FALSE	FALSE	FALSE	4
F1SS01	ARPC2	-0.372	0.24	0.887	FALSE	FALSE	FALSE	3
F1RQQ8	PYGM	-0.369	0.32	0.916	FALSE	FALSE	FALSE	3
K7GR63	STK4	-0.365	0.457	0.941	FALSE	FALSE	FALSE	12
A0A287AS29	NME1	-0.364	0.421	0.935	FALSE	FALSE	FALSE	12
A0A287B0C4	STK24	-0.362	0.604	0.956	FALSE	FALSE	FALSE	15
A0A480Q0Y5	ILK	-0.362	0.425	0.938	FALSE	FALSE	FALSE	1
K9IWA3	ATP6AP1	-0.362	0.412	0.932	FALSE	FALSE	FALSE	14
F1S0Y1	HMCN2	-0.361	0.1	0.735	FALSE	FALSE	FALSE	0
F1SMC0	CAP1	-0.36	0.348	0.923	FALSE	FALSE	FALSE	4
A0A8W4F6U6	LOC100515741	-0.359	0.349	0.923	FALSE	FALSE	FALSE	7
K7GQL2	F13A1	-0.358	0.145	0.814	FALSE	FALSE	FALSE	0
Q29024	DDX39B	-0.358	0.438	0.939	FALSE	FALSE	FALSE	9
A0A287BA60	RANBP1	-0.357	0.58	0.954	FALSE	FALSE	FALSE	14
A0A5G2QXT5	A0A5G2QXT5	-0.356	0.208	0.87	FALSE	FALSE	FALSE	0
Q9GLP0	ITGB1	-0.356	0.164	0.835	FALSE	FALSE	FALSE	0
A0A287A853	GNA13	-0.355	0.49	0.945	FALSE	FALSE	FALSE	12
A0A4X1UE92	SPTB	-0.355	0.305	0.912	FALSE	FALSE	FALSE	3
A0A286ZSX6	A0A286ZSX6	-0.354	0.232	0.884	FALSE	FALSE	FALSE	0
K7GLE5	LOC100626157	-0.354	0.469	0.943	FALSE	FALSE	FALSE	10
A0A287B7U5	CLIP1	-0.353	0.594	0.955	FALSE	FALSE	FALSE	13
F1RL06	LOC100523213	-0.353	0.152	0.822	FALSE	FALSE	FALSE	0
K7GQY0	FGFR2	-0.353	0.205	0.864	FALSE	FALSE	FALSE	6
A0A480LCB3	FMNL1	-0.352	0.325	0.917	FALSE	FALSE	FALSE	5
A0A4X1SUR0	ATP1A1	-0.351	0.481	0.943	FALSE	FALSE	FALSE	14
A0A8W4FKP8	LOC100513601	-0.351	0.0831	0.687	FALSE	FALSE	FALSE	0
A0A287AXI8	FSTL3	-0.347	0.438	0.94	FALSE	FALSE	FALSE	2
A0A5G2R318	H2AZ2	-0.347	0.622	0.958	FALSE	FALSE	FALSE	0
A0A287B5Y6	LBP	-0.345	0.469	0.944	FALSE	FALSE	FALSE	1
I3LKI1	SRGN	-0.341	0.354	0.925	FALSE	FALSE	FALSE	0
I3LAA0	RARRES1	-0.34	0.207	0.87	FALSE	FALSE	FALSE	0
P68137	ACTA1	-0.34	0.167	0.838	FALSE	FALSE	FALSE	0
K7GR08	ICAM3	-0.339	0.306	0.911	FALSE	FALSE	FALSE	7
Q2EHH8	PPP1CA	-0.339	0.489	0.946	FALSE	FALSE	FALSE	10
A0A287B636	GLA	-0.338	0.701	0.963	FALSE	FALSE	FALSE	13
A0A4X1T854	AP2B1	-0.337	0.297	0.909	FALSE	FALSE	FALSE	3
F1RKM0	LMNB1	-0.337	0.498	0.947	FALSE	FALSE	FALSE	10
A0A5G2RBI2	RBBP7	-0.336	0.309	0.912	FALSE	FALSE	FALSE	7
A0A287AFG3	LSP1	-0.335	0.213	0.872	FALSE	FALSE	FALSE	3
F1RZH2	LIPC	-0.333	0.575	0.955	FALSE	FALSE	FALSE	5
A0A4X1VLX6	GPX6	-0.332	0.442	0.94	FALSE	FALSE	FALSE	7
F1RIE3	VWCE	-0.327	0.412	0.935	FALSE	FALSE	FALSE	7
A0A8W4F753	SLA-3	-0.326	0.212	0.872	FALSE	FALSE	FALSE	0
F2Z4Z8	GNB2	-0.326	0.306	0.912	FALSE	FALSE	FALSE	2
I3LE48	IL1R2	-0.326	0.546	0.952	FALSE	FALSE	FALSE	10
A0A5G2QC96	F13B	-0.325	0.351	0.924	FALSE	FALSE	FALSE	0
F1S1X9	TXNL1	-0.324	0.707	0.963	FALSE	FALSE	FALSE	14
F1S7J6	SAFB	-0.324	0.333	0.919	FALSE	FALSE	FALSE	5
A0A287BHS8	MAPK14	-0.322	0.154	0.82	FALSE	FALSE	FALSE	4
F1RPC1	PIK3IP1	-0.32	0.222	0.877	FALSE	FALSE	FALSE	4
A0A5G2QKE0	IFITM1	-0.319	0.623	0.958	FALSE	FALSE	FALSE	9
A0A5G2R113	DMKN	-0.319	0.237	0.885	FALSE	FALSE	FALSE	3
A0A287BHM1	TPM1	-0.318	0.37	0.928	FALSE	FALSE	FALSE	0
I3LMU0	SERPINA11	-0.318	0.229	0.882	FALSE	FALSE	FALSE	0
F1S584	SLC44A2	-0.317	0.461	0.941	FALSE	FALSE	FALSE	12
A0A286ZRJ8	TPST2	-0.316	0.321	0.914	FALSE	FALSE	FALSE	9
A0A4X1VS57	EEF2	-0.312	0.114	0.765	FALSE	FALSE	FALSE	0
F2Z565	SLC25A5	-0.312	0.768	0.966	FALSE	FALSE	FALSE	11
Q06AV4	ITM2C	-0.31	0.547	0.951	FALSE	FALSE	FALSE	13
A0A4X1VQ69	MYL12A	-0.309	0.454	0.942	FALSE	FALSE	FALSE	1
F1RRV7	ST3GAL1	-0.309	0.144	0.812	FALSE	FALSE	FALSE	0
A0A286ZWK2	HSPA8	-0.308	0.113	0.763	FALSE	FALSE	FALSE	0
A0A287AKW2	A0A287AKW2	-0.307	0.534	0.951	FALSE	FALSE	FALSE	0
K7GNJ7	HUWE1	-0.307	0.179	0.848	FALSE	FALSE	FALSE	0
F2Z557	PABPC1	-0.306	0.299	0.91	FALSE	FALSE	FALSE	4
I3LUA2	GSDMB	-0.306	0.548	0.952	FALSE	FALSE	FALSE	8
A0A287AXN9	KRT17	-0.304	0.692	0.963	FALSE	FALSE	FALSE	3
I3L5B0	ADD2	-0.304	0.505	0.947	FALSE	FALSE	FALSE	12
A0A287B465	IDH1	-0.301	0.275	0.902	FALSE	FALSE	FALSE	2
Q3BDI7	DSG1	-0.301	0.733	0.964	FALSE	FALSE	FALSE	14
A0A5G2QCU4	EMILIN1	-0.3	0.101	0.737	FALSE	FALSE	FALSE	0
A0A8W4FB62	APOA5	-0.299	0.279	0.904	FALSE	FALSE	FALSE	0
Q28989	AMBN	-0.299	0.292	0.909	FALSE	FALSE	FALSE	0
A0A287BNX9	A0A287BNX9	-0.294	0.44	0.94	FALSE	FALSE	FALSE	0
F1RIJ7	TAS1R1	-0.294	0.611	0.957	FALSE	FALSE	FALSE	14
A0A480J3V8	KRT19	-0.293	0.75	0.966	FALSE	FALSE	FALSE	0
A0A5G2QPY8	LIMS1	-0.293	0.563	0.954	FALSE	FALSE	FALSE	7
F1SGG6	KRT5	-0.291	0.717	0.964	FALSE	FALSE	FALSE	0
A0A287BQ31	A0A287BQ31	-0.29	0.664	0.96	FALSE	FALSE	FALSE	16
F1S7S5	SUCO	-0.29	0.231	0.881	FALSE	FALSE	FALSE	5
I3LGD4	CLTC	-0.289	0.309	0.913	FALSE	FALSE	FALSE	2
K7GLL6	FRAS1	-0.288	0.348	0.923	FALSE	FALSE	FALSE	3
A0A287B8X7	DNM2	-0.286	0.564	0.953	FALSE	FALSE	FALSE	11
F1SCZ6	MINPP1	-0.285	0.854	0.97	FALSE	FALSE	FALSE	13
A0A287BMT4	A0A287BMT4	-0.284	0.482	0.946	FALSE	FALSE	FALSE	0
F1SQR8	LTA4H	-0.283	0.451	0.942	FALSE	FALSE	FALSE	0
Q06AS6	GNAI2	-0.282	0.27	0.901	FALSE	FALSE	FALSE	1
F1S165	TMEM132E	-0.28	0.324	0.917	FALSE	FALSE	FALSE	4
Q07717	B2M	-0.279	0.534	0.951	FALSE	FALSE	FALSE	10
A0A5G2RHH2	EHD1	-0.278	0.141	0.808	FALSE	FALSE	FALSE	0
P27917	APOC3	-0.278	0.303	0.912	FALSE	FALSE	FALSE	0
A0A4X1W9P4	STK26	-0.277	0.36	0.925	FALSE	FALSE	FALSE	7
A0A287A1I4	HS3ST3A1	-0.276	0.338	0.919	FALSE	FALSE	FALSE	10
A0A8W4FEC5	TMEM263	-0.276	0.574	0.954	FALSE	FALSE	FALSE	10
F6PSJ3	APOC2	-0.276	0.247	0.891	FALSE	FALSE	FALSE	0
P19205	APEH	-0.274	0.394	0.932	FALSE	FALSE	FALSE	5
A0A8D1ZHZ0	PCSK5	-0.272	0.14	0.807	FALSE	FALSE	FALSE	0
O77633	ADAM10	-0.272	0.452	0.941	FALSE	FALSE	FALSE	9
A0A480HZP7	FLII	-0.27	0.273	0.902	FALSE	FALSE	FALSE	0
I3LER5	COX4I1	-0.27	0.684	0.962	FALSE	FALSE	FALSE	15
A0A8D1RXR4	TUBA8	-0.269	0.69	0.962	FALSE	FALSE	FALSE	9
A0A287ATF2	DSG2	-0.268	0.318	0.916	FALSE	FALSE	FALSE	0
F1RVS9	PI16	-0.268	0.445	0.941	FALSE	FALSE	FALSE	0
F1RW93	GASK1B	-0.268	0.712	0.964	FALSE	FALSE	FALSE	9
F1SS24	FN1	-0.268	0.27	0.901	FALSE	FALSE	FALSE	0
A0A287B968	CD3E	-0.267	0.713	0.964	FALSE	FALSE	FALSE	12
A0A4X1SRU3	PSMC4	-0.266	0.425	0.938	FALSE	FALSE	FALSE	4
F1RVT6	NGFR	-0.265	0.472	0.944	FALSE	FALSE	FALSE	1
F1STC5	F1STC5	-0.264	0.402	0.934	FALSE	FALSE	FALSE	0
F1RMN3	PPP6R1	-0.263	0.703	0.962	FALSE	FALSE	FALSE	16
Q5S1U1	HSPB1	-0.263	0.283	0.905	FALSE	FALSE	FALSE	0
A0A286ZQ44	DCXR	-0.261	0.718	0.964	FALSE	FALSE	FALSE	13
Q6S4N2	HSPA1B	-0.261	0.566	0.954	FALSE	FALSE	FALSE	1
A0A287AVP9	APLP1	-0.26	0.173	0.844	FALSE	FALSE	FALSE	0
F1S9H7	F1S9H7	-0.26	0.71	0.964	FALSE	FALSE	FALSE	0
A0A5G2QDJ1	ARHGAP1	-0.258	0.538	0.951	FALSE	FALSE	FALSE	3
P24853	IGFBP2	-0.255	0.327	0.919	FALSE	FALSE	FALSE	0
A0A4X1TT69	PRG4	-0.254	0.405	0.935	FALSE	FALSE	FALSE	0
A0A4X1VDN4	CLIC1	-0.254	0.266	0.899	FALSE	FALSE	FALSE	0
F1RHK7	PEAR1	-0.254	0.704	0.963	FALSE	FALSE	FALSE	16
F1S788	C8A	-0.254	0.21	0.871	FALSE	FALSE	FALSE	0
Q95JH1	ITGB3	-0.254	0.602	0.957	FALSE	FALSE	FALSE	1
Q29214	RPLP0	-0.252	0.135	0.8	FALSE	FALSE	FALSE	0
P29269	MYL9	-0.251	0.58	0.955	FALSE	FALSE	FALSE	4
C0LZL0	FSCN1	-0.25	0.524	0.95	FALSE	FALSE	FALSE	5
A0A286ZU05	DKKL1	-0.248	0.136	0.8	FALSE	FALSE	FALSE	1
A0A480I6L4	MYO1C	-0.248	0.698	0.963	FALSE	FALSE	FALSE	11
A0A5G2R0Y2	COL6A6	-0.248	0.252	0.893	FALSE	FALSE	FALSE	2
A0A287AVV3	CYFIP2	-0.246	0.466	0.943	FALSE	FALSE	FALSE	6
A0A5G2R562	PPM1L	-0.246	0.596	0.956	FALSE	FALSE	FALSE	11
I3LCW1	FASN	-0.244	0.937	0.973	FALSE	FALSE	FALSE	16
A0A5G2QNB9	EXT2	-0.243	0.537	0.951	FALSE	FALSE	FALSE	6
Q2V6R9	MADCAM1	-0.243	0.239	0.888	FALSE	FALSE	FALSE	0
A0A8W4FFD2	A0A8W4FFD2	-0.242	0.827	0.969	FALSE	FALSE	FALSE	9
O19063	APCS	-0.242	0.693	0.963	FALSE	FALSE	FALSE	0
P01846	P01846	-0.241	0.207	0.87	FALSE	FALSE	FALSE	0
A5GFX6	TUBB1	-0.24	0.557	0.953	FALSE	FALSE	FALSE	0
F1RLG5	REEP5	-0.24	0.669	0.961	FALSE	FALSE	FALSE	10
A0A287BKI9	B3GNT7	-0.239	0.385	0.931	FALSE	FALSE	FALSE	4
A0A480ZQ94	FBLN5	-0.238	0.145	0.813	FALSE	FALSE	FALSE	0
I3L8I5	EIF6	-0.238	0.755	0.966	FALSE	FALSE	FALSE	14
A0A5G2R4Y9	PSMB6	-0.237	0.383	0.931	FALSE	FALSE	FALSE	0
A0A5G2R924	SPTA1	-0.235	0.403	0.934	FALSE	FALSE	FALSE	3
A0A5G2RAJ8	ME1	-0.234	0.773	0.967	FALSE	FALSE	FALSE	13
A0A287BTH4	C4BPA	-0.233	0.477	0.945	FALSE	FALSE	FALSE	0
B5APU6	ARPC1B	-0.233	0.36	0.926	FALSE	FALSE	FALSE	1
A0A286ZUL8	A0A286ZUL8	-0.232	0.488	0.946	FALSE	FALSE	FALSE	0
A0A287AMB7	SIT1	-0.23	0.611	0.957	FALSE	FALSE	FALSE	9
F1SEL6	GDF2	-0.23	0.533	0.951	FALSE	FALSE	FALSE	3
A0A286ZUI3	EEF1A1	-0.229	0.25	0.893	FALSE	FALSE	FALSE	0
K7GL83	ILF3	-0.229	0.222	0.878	FALSE	FALSE	FALSE	0
A7Y521	COPS4	-0.228	0.503	0.948	FALSE	FALSE	FALSE	3
F1S8D4	WDR77	-0.227	0.626	0.958	FALSE	FALSE	FALSE	7
F1SL22	VWF	-0.225	0.271	0.901	FALSE	FALSE	FALSE	0
A0A287B6Z7	ADGRL4	-0.224	0.43	0.939	FALSE	FALSE	FALSE	0
A0A480UV25	TUBB4A	-0.224	0.404	0.935	FALSE	FALSE	FALSE	0
A1XQU9	RPS20	-0.221	0.79	0.967	FALSE	FALSE	FALSE	13
A0A8W4FGK7	A0A8W4FGK7	-0.22	0.505	0.948	FALSE	FALSE	FALSE	0
A0A287AUR4	A0A287AUR4	-0.218	0.446	0.941	FALSE	FALSE	FALSE	0
A0A286ZPG0	APOC4	-0.217	0.444	0.941	FALSE	FALSE	FALSE	0
A0A5G2R3T7	ITGAL	-0.217	0.567	0.954	FALSE	FALSE	FALSE	8
A0A4X1U6G7	RAB5C	-0.216	0.422	0.937	FALSE	FALSE	FALSE	4
A0A5G2QSZ2	RNF123	-0.216	0.508	0.948	FALSE	FALSE	FALSE	7
F1RUS9	B4GAT1	-0.216	0.346	0.923	FALSE	FALSE	FALSE	0
F1S8V7	CPN1	-0.216	0.307	0.913	FALSE	FALSE	FALSE	0
A0A287AE51	A0A287AE51	-0.214	0.667	0.961	FALSE	FALSE	FALSE	0
A0A481BCM9	APOA2	-0.213	0.446	0.941	FALSE	FALSE	FALSE	0
A0A5G2R840	HABP2	-0.212	0.341	0.922	FALSE	FALSE	FALSE	0
A0A286ZIH7	ACTR3	-0.211	0.44	0.94	FALSE	FALSE	FALSE	2
P0CG68	UBA52	-0.211	0.424	0.938	FALSE	FALSE	FALSE	0
P14460	FGA	-0.211	0.353	0.925	FALSE	FALSE	FALSE	0
A0A287AFE3	LOC110258312	-0.21	0.236	0.886	FALSE	FALSE	FALSE	0
A0A480REB3	EHD3	-0.209	0.489	0.947	FALSE	FALSE	FALSE	0
F1RMZ6	GFRA2	-0.207	0.678	0.961	FALSE	FALSE	FALSE	15
A0A287A9G4	ASS1	-0.206	0.815	0.968	FALSE	FALSE	FALSE	17
A0A287B501	RBX1	-0.206	0.756	0.965	FALSE	FALSE	FALSE	16
A0A4X1TSZ3	RAB10	-0.206	0.386	0.931	FALSE	FALSE	FALSE	1
F1S4Y1	GGT7	-0.206	0.723	0.964	FALSE	FALSE	FALSE	10
F1SNB0	SUSD1	-0.206	0.651	0.96	FALSE	FALSE	FALSE	9
A0A4X1ULH9	RAC2	-0.205	0.172	0.843	FALSE	FALSE	FALSE	0
A0A8W4FGG7	MSN	-0.205	0.484	0.946	FALSE	FALSE	FALSE	1
F2Z4Y1	YWHAH	-0.205	0.304	0.912	FALSE	FALSE	FALSE	0
P50390	TTR	-0.204	0.363	0.927	FALSE	FALSE	FALSE	0
A0A286ZTI5	CD81	-0.202	0.581	0.955	FALSE	FALSE	FALSE	1
F1RXA7	PSMD3	-0.202	0.501	0.948	FALSE	FALSE	FALSE	2
A0A4X1T574	CCL16	-0.2	0.512	0.949	FALSE	FALSE	FALSE	2
A0A5G2QX54	LOC100158003	-0.2	0.561	0.953	FALSE	FALSE	FALSE	8
Q5PYH3	SAR1B	-0.2	0.563	0.954	FALSE	FALSE	FALSE	4
A0A287A7L8	PTPRF	-0.199	0.494	0.947	FALSE	FALSE	FALSE	3
F1S3U9	PRDX1	-0.198	0.711	0.964	FALSE	FALSE	FALSE	7
A0A287A0E9	CLCA1	-0.197	0.538	0.952	FALSE	FALSE	FALSE	0
Q2LE37	APOM	-0.197	0.348	0.924	FALSE	FALSE	FALSE	0
A0A286ZIN9	PLIN3	-0.195	0.348	0.924	FALSE	FALSE	FALSE	0
I3L6R5	HPN	-0.194	0.475	0.945	FALSE	FALSE	FALSE	0
A0A4X1TB30	CUTA	-0.193	0.388	0.932	FALSE	FALSE	FALSE	0
F1STR9	SFN	-0.192	0.698	0.963	FALSE	FALSE	FALSE	14
P26044	RDX	-0.192	0.673	0.961	FALSE	FALSE	FALSE	10
A0A287A027	LAMA2	-0.191	0.349	0.924	FALSE	FALSE	FALSE	0
A0A5K1UKC5	BGN	-0.19	0.551	0.953	FALSE	FALSE	FALSE	0
Q1RPR6	ITGB6	-0.19	0.802	0.968	FALSE	FALSE	FALSE	13
Q6YBV4	DSPP	-0.19	0.558	0.953	FALSE	FALSE	FALSE	0
A0A481BLI9	SERPIND1	-0.189	0.409	0.935	FALSE	FALSE	FALSE	0
F1SPM6	GFPT1	-0.189	0.376	0.93	FALSE	FALSE	FALSE	0
A0A286ZJF0	ITGAE	-0.188	0.427	0.938	FALSE	FALSE	FALSE	0
F1SPM5	ANTXR1	-0.188	0.373	0.929	FALSE	FALSE	FALSE	0
I3L703	FAM114A2	-0.188	0.76	0.966	FALSE	FALSE	FALSE	11
Q4GWZ2	RPSA	-0.188	0.561	0.954	FALSE	FALSE	FALSE	4
A0A287BFE6	RAB35	-0.186	0.744	0.965	FALSE	FALSE	FALSE	13
C0JPM4	TIMP2	-0.186	0.414	0.936	FALSE	FALSE	FALSE	1
A0A287BA39	TNIK	-0.184	0.748	0.965	FALSE	FALSE	FALSE	11
A0A287BEY3	LOC100624077	-0.184	0.428	0.939	FALSE	FALSE	FALSE	0
A0A4X1TAH5	RAP1A	-0.184	0.651	0.96	FALSE	FALSE	FALSE	4
A0A5G2QE59	MASP1	-0.183	0.27	0.901	FALSE	FALSE	FALSE	0
A0A8W4FCZ3	A0A8W4FCZ3	-0.183	0.38	0.93	FALSE	FALSE	FALSE	0
F1RMU0	PCDHGA6	-0.183	0.345	0.923	FALSE	FALSE	FALSE	0
Q1W2K3	PSMB10	-0.183	0.327	0.919	FALSE	FALSE	FALSE	0
A0A075B7H9	A0A075B7H9	-0.182	0.458	0.943	FALSE	FALSE	FALSE	0
A0PFK7	CAPZB	-0.182	0.493	0.947	FALSE	FALSE	FALSE	0
F1RJQ6	EXTL3	-0.181	0.474	0.944	FALSE	FALSE	FALSE	8
F1RVL5	MYOM2	-0.181	0.794	0.967	FALSE	FALSE	FALSE	12
K7GS96	FGFR3	-0.181	0.578	0.955	FALSE	FALSE	FALSE	3
A7J149	BPIFB1	-0.18	0.562	0.954	FALSE	FALSE	FALSE	0
I3LB89	LDLR	-0.18	0.571	0.955	FALSE	FALSE	FALSE	0
A0A287B490	OAF	-0.179	0.265	0.899	FALSE	FALSE	FALSE	0
F1SS26	THBS1	-0.178	0.53	0.951	FALSE	FALSE	FALSE	0
A0A286ZR55	NEO1	-0.177	0.313	0.915	FALSE	FALSE	FALSE	0
A0A287A6D5	MIA2	-0.177	0.569	0.954	FALSE	FALSE	FALSE	2
A0A5G2QZQ7	RANBP3	-0.177	0.702	0.963	FALSE	FALSE	FALSE	8
A0A8W4FFP1	A0A8W4FFP1	-0.177	0.607	0.957	FALSE	FALSE	FALSE	5
A0A287A0M2	ARSG	-0.176	0.675	0.962	FALSE	FALSE	FALSE	1
A0A8W4FQ38	A0A8W4FQ38	-0.175	0.46	0.943	FALSE	FALSE	FALSE	0
A0A287A5G2	PAM	-0.174	0.396	0.933	FALSE	FALSE	FALSE	0
P07200	TGFB1	-0.174	0.497	0.947	FALSE	FALSE	FALSE	0
A0A480PLY3	YWHAZ	-0.173	0.477	0.945	FALSE	FALSE	FALSE	0
F1SPF6	RUVBL1	-0.173	0.683	0.962	FALSE	FALSE	FALSE	9
A0A4X1UE23	PDIA6	-0.172	0.534	0.951	FALSE	FALSE	FALSE	0
A0A8W4FH30	A0A8W4FH30	-0.172	0.637	0.959	FALSE	FALSE	FALSE	10
F1RQY8	ITGA2B	-0.172	0.705	0.963	FALSE	FALSE	FALSE	1
P02587	TNNC2	-0.172	0.663	0.961	FALSE	FALSE	FALSE	0
P62802	P62802	-0.171	0.772	0.967	FALSE	FALSE	FALSE	0
A0A5G2Q7F8	A0A5G2Q7F8	-0.169	0.618	0.958	FALSE	FALSE	FALSE	0
I3LQN5	ADAM15	-0.169	0.427	0.938	FALSE	FALSE	FALSE	0
Q2HWD6	KIT	-0.169	0.504	0.948	FALSE	FALSE	FALSE	2
A0A286ZNY1	TUBA4A	-0.168	0.606	0.957	FALSE	FALSE	FALSE	0
A0A287BHL7	ECM1	-0.168	0.309	0.914	FALSE	FALSE	FALSE	0
A0A8W4F6P2	A0A8W4F6P2	-0.168	0.445	0.941	FALSE	FALSE	FALSE	0
I3LC14	ADAMTSL2	-0.168	0.458	0.943	FALSE	FALSE	FALSE	0
P35750	CAPN1	-0.168	0.428	0.938	FALSE	FALSE	FALSE	0
Q6PP07	ADIPOQ	-0.168	0.544	0.952	FALSE	FALSE	FALSE	0
A0A286ZLG5	NBL1	-0.167	0.615	0.958	FALSE	FALSE	FALSE	2
F1RQ01	FERMT3	-0.167	0.519	0.95	FALSE	FALSE	FALSE	1
I3LTD0	LYVE1	-0.167	0.5	0.948	FALSE	FALSE	FALSE	0
A0A8W4FNX5	SLAMF9	-0.166	0.85	0.969	FALSE	FALSE	FALSE	17
F1RKW8	PSMD11	-0.165	0.668	0.961	FALSE	FALSE	FALSE	2
A0A287AP28	A0A287AP28	-0.164	0.393	0.933	FALSE	FALSE	FALSE	0
A0A287BKJ2	FGL1	-0.164	0.566	0.954	FALSE	FALSE	FALSE	0
Q28944	CTSL	-0.164	0.475	0.945	FALSE	FALSE	FALSE	1
A0A286ZQH4	SPN	-0.163	0.5	0.948	FALSE	FALSE	FALSE	0
A0A287APN4	SPON2	-0.163	0.472	0.944	FALSE	FALSE	FALSE	0
F1STR4	PRSS23	-0.163	0.498	0.947	FALSE	FALSE	FALSE	2
A0A286ZMW3	HGFAC	-0.162	0.379	0.93	FALSE	FALSE	FALSE	0
A7TX81	COPS6	-0.162	0.669	0.961	FALSE	FALSE	FALSE	4
A0A8D0US59	PROCR	-0.159	0.495	0.947	FALSE	FALSE	FALSE	5
F1S710	CACYBP	-0.159	0.857	0.97	FALSE	FALSE	FALSE	17
Q4A3R3	DMBT1	-0.159	0.819	0.969	FALSE	FALSE	FALSE	6
A0A287AEW5	A0A287AEW5	-0.158	0.706	0.963	FALSE	FALSE	FALSE	3
I3L9V2	VAT1	-0.157	0.316	0.916	FALSE	FALSE	FALSE	0
A0A287ANX9	A0A287ANX9	-0.156	0.567	0.954	FALSE	FALSE	FALSE	0
A0A287AFQ4	C8G	-0.155	0.366	0.928	FALSE	FALSE	FALSE	0
I3LEE6	PCOLCE	-0.155	0.452	0.942	FALSE	FALSE	FALSE	0
A0A286ZPA0	LOC100520329	-0.154	0.924	0.972	FALSE	FALSE	FALSE	15
P16276	ACO2	-0.154	0.861	0.97	FALSE	FALSE	FALSE	17
P67937	TPM4	-0.154	0.674	0.962	FALSE	FALSE	FALSE	0
A0A287AT36	C8B	-0.153	0.432	0.939	FALSE	FALSE	FALSE	0
A0A5K1ULP5	COPS2	-0.153	0.683	0.962	FALSE	FALSE	FALSE	2
A0A286ZLM1	B3GNT8	-0.152	0.475	0.945	FALSE	FALSE	FALSE	0
A0A287B8B6	CAPG	-0.152	0.845	0.969	FALSE	FALSE	FALSE	16
A0A287AT18	PSMA7	-0.151	0.401	0.934	FALSE	FALSE	FALSE	0
A0A5G2QCL1	C4A	-0.151	0.692	0.963	FALSE	FALSE	FALSE	0
A0A5G2QMA5	FAM114A1	-0.151	0.633	0.959	FALSE	FALSE	FALSE	0
I3LDS3	KRT10	-0.151	0.856	0.97	FALSE	FALSE	FALSE	0
K7GP71	FCAMR	-0.151	0.467	0.944	FALSE	FALSE	FALSE	0
E2I6L6	IGFBP5	-0.15	0.73	0.965	FALSE	FALSE	FALSE	5
A0A287AA42	A0A287AA42	-0.149	0.695	0.963	FALSE	FALSE	FALSE	0
A0A287AWY5	PCDHGA4	-0.148	0.362	0.927	FALSE	FALSE	FALSE	0
Q8HZV3	TFRC	-0.148	0.552	0.953	FALSE	FALSE	FALSE	0
A0A5G2R305	HAPLN3	-0.147	0.482	0.946	FALSE	FALSE	FALSE	0
B8XH67	NHERF1	-0.147	0.753	0.966	FALSE	FALSE	FALSE	6
F2Z5N0	PSMA6	-0.147	0.396	0.933	FALSE	FALSE	FALSE	0
I3LGB2	PCSK9	-0.147	0.631	0.959	FALSE	FALSE	FALSE	0
K7GS49	ILF2	-0.146	0.435	0.94	FALSE	FALSE	FALSE	0
P00355	GAPDH	-0.146	0.509	0.949	FALSE	FALSE	FALSE	0
A0A287BBP3	NRXN1	-0.145	0.437	0.94	FALSE	FALSE	FALSE	0
A0A287BPP9	PSMB1	-0.143	0.413	0.936	FALSE	FALSE	FALSE	0
F1SHC1	LOC100127131	-0.143	0.641	0.96	FALSE	FALSE	FALSE	0
P06867	PLG	-0.143	0.319	0.917	FALSE	FALSE	FALSE	0
A0A8W4FNY0	FCN2	-0.142	0.892	0.971	FALSE	FALSE	FALSE	2
I3LDR9	CAVIN2	-0.142	0.736	0.965	FALSE	FALSE	FALSE	2
Q9TUB5	CLCA1	-0.142	0.751	0.966	FALSE	FALSE	FALSE	5
A1E295	CTSB	-0.141	0.557	0.953	FALSE	FALSE	FALSE	2
I3L7Y9	BIN2	-0.141	0.595	0.956	FALSE	FALSE	FALSE	0
Q0Z8U2	RPS3	-0.141	0.766	0.966	FALSE	FALSE	FALSE	8
A0A286ZN52	PSMB3	-0.14	0.414	0.936	FALSE	FALSE	FALSE	0
A0A287AL92	C4BPB	-0.139	0.617	0.958	FALSE	FALSE	FALSE	0
A0A4X1V170	PSMB8	-0.139	0.479	0.945	FALSE	FALSE	FALSE	0
A0A5G2R4Q7	VPS35	-0.138	0.7	0.963	FALSE	FALSE	FALSE	2
A0A5K1VDW0	ARPC5L	-0.137	0.711	0.963	FALSE	FALSE	FALSE	12
Q29387	EEF1G	-0.136	0.412	0.936	FALSE	FALSE	FALSE	0
A0A286ZIM1	A0A286ZIM1	-0.134	0.791	0.967	FALSE	FALSE	FALSE	11
I3LQ84	COL6A2	-0.134	0.535	0.951	FALSE	FALSE	FALSE	0
A0A286ZMB2	GGH	-0.133	0.712	0.964	FALSE	FALSE	FALSE	8
F1ST81	DBNL	-0.133	0.663	0.961	FALSE	FALSE	FALSE	0
F1RPQ3	PSMD14	-0.132	0.738	0.965	FALSE	FALSE	FALSE	6
I3LC92	ENOSF1	-0.132	0.687	0.962	FALSE	FALSE	FALSE	0
I3LPP4	CSE1L	-0.132	0.855	0.97	FALSE	FALSE	FALSE	10
A0A287BLF6	A0A287BLF6	-0.13	0.7	0.963	FALSE	FALSE	FALSE	8
F1RT53	LYN	-0.129	0.849	0.97	FALSE	FALSE	FALSE	14
A0A286ZVK1	F11	-0.128	0.645	0.96	FALSE	FALSE	FALSE	1
A2SW51	CD14	-0.128	0.643	0.96	FALSE	FALSE	FALSE	0
F1S3I1	ANGPTL6	-0.128	0.441	0.94	FALSE	FALSE	FALSE	0
Q0Z8R0	CST3	-0.128	0.643	0.96	FALSE	FALSE	FALSE	4
A0A287A6N0	GALNT2	-0.127	0.658	0.961	FALSE	FALSE	FALSE	6
A0A5G2QR34	PGD	-0.127	0.651	0.96	FALSE	FALSE	FALSE	0
F1RMA3	CCAR2	-0.127	0.808	0.968	FALSE	FALSE	FALSE	13
A0A286ZJB0	LIMS2	-0.126	0.902	0.972	FALSE	FALSE	FALSE	14
F1RP09	ITGBL1	-0.126	0.596	0.956	FALSE	FALSE	FALSE	0
F1RMN6	SMPD1	-0.125	0.601	0.957	FALSE	FALSE	FALSE	1
A0A287B1L8	NOTCH1	-0.124	0.564	0.954	FALSE	FALSE	FALSE	0
Q9GJT2	ESD	-0.124	0.784	0.967	FALSE	FALSE	FALSE	7
A0A287BNE7	RTN4RL2	-0.123	0.586	0.956	FALSE	FALSE	FALSE	1
K9IVC9	FAF1	-0.123	0.91	0.972	FALSE	FALSE	FALSE	15
I3LAB6	PSMA2	-0.122	0.463	0.943	FALSE	FALSE	FALSE	0
F1RN76	CD5L	-0.121	0.659	0.961	FALSE	FALSE	FALSE	0
F1S663	LAMC1	-0.121	0.513	0.949	FALSE	FALSE	FALSE	0
A0A4X1VQR6	GLIPR2	-0.12	0.729	0.965	FALSE	FALSE	FALSE	1
H6UWK6	OLFML3	-0.12	0.496	0.947	FALSE	FALSE	FALSE	0
I3LVS7	RHOA	-0.12	0.549	0.953	FALSE	FALSE	FALSE	0
A0A287A3A3	AKAP12	-0.119	0.477	0.945	FALSE	FALSE	FALSE	0
E7CXS0	LRP8	-0.119	0.653	0.96	FALSE	FALSE	FALSE	5
A0A287A3A0	SFRP4	-0.118	0.691	0.963	FALSE	FALSE	FALSE	5
A0A287B088	PSMB4	-0.118	0.499	0.948	FALSE	FALSE	FALSE	0
F2Z4Z1	YWHAG	-0.118	0.599	0.957	FALSE	FALSE	FALSE	0
G8ENL5	EWSR1	-0.118	0.783	0.967	FALSE	FALSE	FALSE	10
P26234	VCL	-0.118	0.562	0.954	FALSE	FALSE	FALSE	0
A0A480DUX8	TWSG1	-0.117	0.609	0.957	FALSE	FALSE	FALSE	0
F1RT78	XYLT2	-0.117	0.598	0.957	FALSE	FALSE	FALSE	0
A0A286ZX26	CTSD	-0.116	0.877	0.971	FALSE	FALSE	FALSE	14
A6M928	EIF4A1	-0.116	0.808	0.968	FALSE	FALSE	FALSE	13
F1RP05	DNAJA2	-0.116	0.877	0.971	FALSE	FALSE	FALSE	11
A0A286ZY90	OLFML1	-0.114	0.58	0.955	FALSE	FALSE	FALSE	0
A0A8W4F8H5	YWHAB	-0.114	0.557	0.953	FALSE	FALSE	FALSE	0
Q2YGT9	RPL6	-0.113	0.9	0.972	FALSE	FALSE	FALSE	12
A0A8W4FGI9	A0A8W4FGI9	-0.112	0.748	0.966	FALSE	FALSE	FALSE	3
Q03472	APOR	-0.112	0.625	0.959	FALSE	FALSE	FALSE	0
F1RXR2	CRELD2	-0.111	0.731	0.965	FALSE	FALSE	FALSE	9
K7GKU8	MASP2	-0.11	0.61	0.958	FALSE	FALSE	FALSE	0
Q29195	RPL10	-0.11	0.837	0.969	FALSE	FALSE	FALSE	14
A0A5K1VSC0	WASF2	-0.109	0.72	0.964	FALSE	FALSE	FALSE	6
I3L9Z6	CX3CL1	-0.109	0.597	0.957	FALSE	FALSE	FALSE	0
F1RFK6	NPTX2	-0.108	0.817	0.969	FALSE	FALSE	FALSE	10
Q0KKC2	MGAT1	-0.108	0.689	0.963	FALSE	FALSE	FALSE	0
F1SCC7	LOC396684	-0.107	0.733	0.965	FALSE	FALSE	FALSE	0
I3L7U2	TNFAIP6	-0.106	0.812	0.968	FALSE	FALSE	FALSE	8
A0A287A1M9	ARF4	-0.105	0.684	0.962	FALSE	FALSE	FALSE	0
F1RGA9	CORO1C	-0.105	0.801	0.968	FALSE	FALSE	FALSE	7
A0A287BDW2	EPB41	-0.104	0.672	0.962	FALSE	FALSE	FALSE	3
A0A287BCS9	CHST11	-0.103	0.736	0.965	FALSE	FALSE	FALSE	4
Q684M6	CDC37	-0.103	0.717	0.964	FALSE	FALSE	FALSE	0
A0A4X1UT36	PSMD5	-0.102	0.645	0.96	FALSE	FALSE	FALSE	0
A0A287B356	EIF5A	-0.101	0.636	0.959	FALSE	FALSE	FALSE	0
A1XQU1	PSMB7	-0.101	0.54	0.952	FALSE	FALSE	FALSE	0
A0A480IXS3	TKFC	-0.0997	0.791	0.968	FALSE	FALSE	FALSE	1
A0A5G2QS97	LRRFIP1	-0.0992	0.719	0.964	FALSE	FALSE	FALSE	0
A0A4X1UTE2	HNRNPK	-0.0991	0.892	0.971	FALSE	FALSE	FALSE	7
A0A5G2R0I5	LTBP4	-0.0986	0.735	0.965	FALSE	FALSE	FALSE	0
A0A287A2Q7	COL2A1	-0.0985	0.74	0.965	FALSE	FALSE	FALSE	0
A0A286ZUW5	P4HA1	-0.0981	0.645	0.96	FALSE	FALSE	FALSE	0
A0A5G2QUU1	FGG	-0.0978	0.612	0.958	FALSE	FALSE	FALSE	0
A0A287AYJ8	SERPINF1	-0.097	0.518	0.95	FALSE	FALSE	FALSE	0
A0A287BCA4	SSC5D	-0.0969	0.688	0.962	FALSE	FALSE	FALSE	5
F1S6Q3	CILP2	-0.0951	0.612	0.958	FALSE	FALSE	FALSE	0
P80229	SERPINB1	-0.0947	0.693	0.963	FALSE	FALSE	FALSE	2
F1SB42	EZR	-0.0939	0.771	0.967	FALSE	FALSE	FALSE	1
Q767L7	TUBB	-0.0938	0.651	0.96	FALSE	FALSE	FALSE	0
A0A8W4FC67	A0A8W4FC67	-0.0935	0.787	0.967	FALSE	FALSE	FALSE	0
K7GKF8	SRPX	-0.0932	0.731	0.965	FALSE	FALSE	FALSE	0
O11780	TGFBI	-0.0932	0.52	0.95	FALSE	FALSE	FALSE	0
A0A5G2QMX5	ICOSLG	-0.0929	0.73	0.965	FALSE	FALSE	FALSE	2
F1RKK5	PRRC1	-0.0929	0.748	0.966	FALSE	FALSE	FALSE	0
P24854	IGFBP4	-0.0916	0.84	0.969	FALSE	FALSE	FALSE	5
F1SBC8	EMILIN2	-0.091	0.697	0.963	FALSE	FALSE	FALSE	1
A0A5G2R3T8	PCSK1N	-0.0909	0.868	0.97	FALSE	FALSE	FALSE	4
A0A287A2L0	ARL8A	-0.0908	0.883	0.971	FALSE	FALSE	FALSE	14
A0A8D0UCW9	PSMA3	-0.0903	0.564	0.954	FALSE	FALSE	FALSE	0
A0A480JRT9	PSMD2	-0.0892	0.724	0.964	FALSE	FALSE	FALSE	0
E5F1H4	STAT6	-0.0892	0.877	0.971	FALSE	FALSE	FALSE	6
A0A287AZD5	MMP9	-0.0876	0.715	0.964	FALSE	FALSE	FALSE	0
I3L5C4	KRT74	-0.087	0.904	0.972	FALSE	FALSE	FALSE	2
A0A287ARU4	SKP1	-0.0865	0.853	0.97	FALSE	FALSE	FALSE	11
I3LF89	CPN2	-0.0862	0.623	0.958	FALSE	FALSE	FALSE	0
A0A287AP71	EFEMP1	-0.0857	0.55	0.953	FALSE	FALSE	FALSE	0
A0A287ACZ4	MAN2A2	-0.0853	0.648	0.96	FALSE	FALSE	FALSE	0
A0A480Y2E3	KNG1	-0.0849	0.69	0.963	FALSE	FALSE	FALSE	0
K7GRN9	NIBAN1	-0.0842	0.663	0.961	FALSE	FALSE	FALSE	0
F1SIE1	ISLR	-0.0835	0.625	0.959	FALSE	FALSE	FALSE	0
F1RJX8	COPA	-0.0831	0.66	0.961	FALSE	FALSE	FALSE	0
F1S1B9	DHRS11	-0.0824	0.613	0.958	FALSE	FALSE	FALSE	0
A0A8W4FA34	A0A8W4FA34	-0.0823	0.886	0.971	FALSE	FALSE	FALSE	13
M1FW61	ST8SIA2	-0.0819	0.665	0.961	FALSE	FALSE	FALSE	0
A0A286ZYI1	NRXN1	-0.0816	0.674	0.962	FALSE	FALSE	FALSE	0
A0A8W4FA09	FLT4	-0.0814	0.648	0.96	FALSE	FALSE	FALSE	0
A0A287ALC1	IGHM	-0.0809	0.698	0.963	FALSE	FALSE	FALSE	0
A0A480I6I0	COL14A1	-0.0803	0.808	0.968	FALSE	FALSE	FALSE	0
A0A287B6S5	ENO1	-0.0802	0.805	0.968	FALSE	FALSE	FALSE	0
F2Z5L7	PSMA1	-0.0795	0.606	0.957	FALSE	FALSE	FALSE	0
A0A8W4FGN1	KPLCE	-0.0794	0.922	0.972	FALSE	FALSE	FALSE	5
F1SAI8	HYOU1	-0.0784	0.593	0.956	FALSE	FALSE	FALSE	0
A0A287AIG3	B4GALT1	-0.078	0.64	0.96	FALSE	FALSE	FALSE	0
F1SPS6	MST1	-0.0771	0.736	0.965	FALSE	FALSE	FALSE	0
P11708	MDH1	-0.0765	0.862	0.97	FALSE	FALSE	FALSE	11
Q767L6	FLOT1	-0.0765	0.924	0.972	FALSE	FALSE	FALSE	15
A0A8W4FIZ4	A0A8W4FIZ4	-0.0759	0.895	0.971	FALSE	FALSE	FALSE	8
A0A5G2QPU0	USP5	-0.0758	0.838	0.969	FALSE	FALSE	FALSE	1
A0A286ZIL9	COL18A1	-0.0754	0.689	0.963	FALSE	FALSE	FALSE	0
F1RRV3	TG	-0.0747	0.855	0.97	FALSE	FALSE	FALSE	0
A0A287A042	MGAM	-0.0734	0.789	0.967	FALSE	FALSE	FALSE	0
A0A5G2QHH9	CFP	-0.0731	0.77	0.967	FALSE	FALSE	FALSE	3
Q45FY6	HPRT1	-0.0731	0.902	0.972	FALSE	FALSE	FALSE	13
Q29095	PTGDS	-0.0702	0.708	0.964	FALSE	FALSE	FALSE	0
A0A480RJC3	C1R	-0.0698	0.673	0.962	FALSE	FALSE	FALSE	0
F2Z5I8	RAB8A	-0.0697	0.726	0.964	FALSE	FALSE	FALSE	4
A0A287B4N8	MARCKSL1	-0.0695	0.896	0.971	FALSE	FALSE	FALSE	15
B9UJD6	C1QTNF3	-0.0687	0.802	0.968	FALSE	FALSE	FALSE	0
A0A287AR56	QSOX2	-0.0679	0.631	0.959	FALSE	FALSE	FALSE	0
A0A480X841	RAB2A	-0.0676	0.751	0.966	FALSE	FALSE	FALSE	2
A0A287AD30	SVEP1	-0.0666	0.797	0.968	FALSE	FALSE	FALSE	0
P0DSN9	SAA4	-0.066	0.888	0.971	FALSE	FALSE	FALSE	7
I3L826	MAN1C1	-0.0657	0.671	0.962	FALSE	FALSE	FALSE	0
A0A287ANV7	LCP1	-0.0644	0.653	0.96	FALSE	FALSE	FALSE	0
A0A4X1ST51	MGAT5	-0.0641	0.684	0.962	FALSE	FALSE	FALSE	0
A0A8W4FAT6	PCBP1	-0.0638	0.823	0.969	FALSE	FALSE	FALSE	0
P82460	TXN	-0.0624	0.859	0.97	FALSE	FALSE	FALSE	1
A0A8W4F971	FHOD1	-0.0622	0.91	0.972	FALSE	FALSE	FALSE	12
A0A287AB45	PFKP	-0.062	0.886	0.971	FALSE	FALSE	FALSE	4
A0A4X1VZI2	PSMD13	-0.0617	0.863	0.97	FALSE	FALSE	FALSE	8
A0A5G2QNN2	C1QB	-0.0609	0.774	0.967	FALSE	FALSE	FALSE	0
A0A4X1UWZ5	PSMA4	-0.0601	0.731	0.965	FALSE	FALSE	FALSE	0
F1SB08	NOTCH2	-0.0593	0.789	0.967	FALSE	FALSE	FALSE	0
A0A286ZRX5	SPARCL1	-0.0592	0.828	0.969	FALSE	FALSE	FALSE	0
A0A287BDT8	PGP	-0.0592	0.799	0.968	FALSE	FALSE	FALSE	0
A0A286ZQA0	TNFSF13	-0.0591	0.922	0.972	FALSE	FALSE	FALSE	13
F1RS31	FREM2	-0.0591	0.809	0.968	FALSE	FALSE	FALSE	1
A0A4X1VZE2	PSMB2	-0.0588	0.727	0.965	FALSE	FALSE	FALSE	0
F1S3H9	LOC100517145	-0.0588	0.655	0.961	FALSE	FALSE	FALSE	0
I3LS72	COL6A1	-0.0582	0.77	0.967	FALSE	FALSE	FALSE	0
A0A287BIL8	HSPA5	-0.0581	0.684	0.962	FALSE	FALSE	FALSE	0
I3LDK9	LOC102164731	-0.058	0.882	0.971	FALSE	FALSE	FALSE	6
F1RJ72	CNMD	-0.0572	0.805	0.968	FALSE	FALSE	FALSE	0
A0A287B8M3	ADAMTS8	-0.0568	0.821	0.969	FALSE	FALSE	FALSE	0
K7GPF5	CD248	-0.056	0.777	0.967	FALSE	FALSE	FALSE	0
A0A287AJQ2	PGAM1	-0.0559	0.905	0.972	FALSE	FALSE	FALSE	7
A0A286ZI36	PKM	-0.0551	0.861	0.97	FALSE	FALSE	FALSE	0
F1SK17	PLIN1	-0.0542	0.842	0.97	FALSE	FALSE	FALSE	0
A0A8W4F6D0	CALD1	-0.0539	0.919	0.972	FALSE	FALSE	FALSE	5
A0A287AL94	PYGL	-0.0533	0.853	0.97	FALSE	FALSE	FALSE	4
A0A286ZU93	CDH17	-0.0532	0.88	0.971	FALSE	FALSE	FALSE	0
A0A4X1SSR6	CAT	-0.0516	0.795	0.968	FALSE	FALSE	FALSE	0
F1RM45	APOE	-0.0507	0.781	0.967	FALSE	FALSE	FALSE	0
A0A4X1VML4	FAP	-0.0503	0.82	0.969	FALSE	FALSE	FALSE	0
A0A4X1SLK1	TREML1	-0.05	0.904	0.972	FALSE	FALSE	FALSE	12
P79307	APP	-0.0497	0.811	0.968	FALSE	FALSE	FALSE	0
A0A286ZZX3	TIMP3	-0.0488	0.929	0.972	FALSE	FALSE	FALSE	14
F1S7E1	COPE	-0.0485	0.916	0.972	FALSE	FALSE	FALSE	8
F1SAT8	CD93	-0.0485	0.789	0.967	FALSE	FALSE	FALSE	0
A0A286ZVJ2	RAP1B	-0.0483	0.815	0.969	FALSE	FALSE	FALSE	0
A0A4X1SWP4	GMFG	-0.0479	0.867	0.97	FALSE	FALSE	FALSE	9
Q2HYU2	PFKM	-0.0477	0.943	0.973	FALSE	FALSE	FALSE	16
A0A4X1T568	RPLP1	-0.0472	0.871	0.971	FALSE	FALSE	FALSE	1
F1SU75	OIT3	-0.0472	0.808	0.968	FALSE	FALSE	FALSE	0
A0A4X1SJX5	SNRPF	-0.047	0.932	0.973	FALSE	FALSE	FALSE	12
A0A5G2QZA1	YWHAQ	-0.0468	0.804	0.968	FALSE	FALSE	FALSE	1
A0A287BIU2	EFEMP2	-0.0459	0.787	0.967	FALSE	FALSE	FALSE	0
Q2QLE0	MET	-0.0454	0.917	0.972	FALSE	FALSE	FALSE	13
Q69DL0	C1QA	-0.0454	0.864	0.97	FALSE	FALSE	FALSE	1
A0A287A1I6	PCDH18	-0.0453	0.793	0.968	FALSE	FALSE	FALSE	0
P16293	F9	-0.0447	0.797	0.968	FALSE	FALSE	FALSE	0
A0A8D1P4F3	PLOD3	-0.0416	0.918	0.972	FALSE	FALSE	FALSE	12
A0A287B1J1	DNPEP	-0.0411	0.943	0.973	FALSE	FALSE	FALSE	14
Q9TV62	MYH4	-0.0407	0.936	0.973	FALSE	FALSE	FALSE	3
I3LCH7	GALNT5	-0.0406	0.872	0.971	FALSE	FALSE	FALSE	0
K7GS60	CD247	-0.0398	0.946	0.973	FALSE	FALSE	FALSE	15
F1SB50	RELN	-0.0397	0.809	0.968	FALSE	FALSE	FALSE	0
A0A8W4FL59	C1S	-0.0386	0.777	0.967	FALSE	FALSE	FALSE	0
A0A8D1TZC9	PCK2	-0.0384	0.959	0.973	FALSE	FALSE	FALSE	14
A0A287B3S3	ITIH1	-0.0379	0.824	0.969	FALSE	FALSE	FALSE	0
A0A480YBV2	CHST7	-0.0374	0.946	0.973	FALSE	FALSE	FALSE	12
A0A8D1M4K5	KLKB1	-0.0373	0.826	0.969	FALSE	FALSE	FALSE	0
A0A287BHY5	KRT2	-0.0364	0.968	0.974	FALSE	FALSE	FALSE	0
F1RM49	PCDH12	-0.036	0.846	0.97	FALSE	FALSE	FALSE	0
F1SRU2	ZYX	-0.0342	0.956	0.973	FALSE	FALSE	FALSE	10
A0A8D1B184	JCHAIN	-0.0336	0.903	0.972	FALSE	FALSE	FALSE	0
Q06AU7	RAB1B	-0.0331	0.928	0.972	FALSE	FALSE	FALSE	10
A0A287BC40	PLA1A	-0.0325	0.907	0.972	FALSE	FALSE	FALSE	0
F1SA57	RAB15	-0.0325	0.948	0.973	FALSE	FALSE	FALSE	14
A0A287A608	AHNAK	-0.0323	0.949	0.973	FALSE	FALSE	FALSE	4
P80895	PCMT1	-0.0322	0.925	0.972	FALSE	FALSE	FALSE	4
F1SMJ1	C7	-0.0318	0.831	0.969	FALSE	FALSE	FALSE	0
A0A287A8I5	MYO1G	-0.0312	0.905	0.972	FALSE	FALSE	FALSE	5
A0A287AJV7	BSDC1	-0.0305	0.963	0.973	FALSE	FALSE	FALSE	7
F1SKM1	COL7A1	-0.0301	0.939	0.973	FALSE	FALSE	FALSE	1
A0A8W4FD62	ADGRF5	-0.0298	0.874	0.971	FALSE	FALSE	FALSE	0
A0A5G2Q9C7	CCT3	-0.0291	0.941	0.973	FALSE	FALSE	FALSE	8
A0A286ZLB1	TRAP1	-0.0289	0.885	0.971	FALSE	FALSE	FALSE	2
F1RTE1	GPC4	-0.0283	0.889	0.971	FALSE	FALSE	FALSE	0
A0A287BKZ4	CDH6	-0.028	0.854	0.97	FALSE	FALSE	FALSE	0
A0A286ZVG7	COL6A3	-0.0279	0.885	0.971	FALSE	FALSE	FALSE	0
A0A287AT94	PYGB	-0.0277	0.953	0.973	FALSE	FALSE	FALSE	6
F1RRX1	LCN2	-0.0276	0.963	0.973	FALSE	FALSE	FALSE	10
I3LEW0	COLEC11	-0.0274	0.856	0.97	FALSE	FALSE	FALSE	0
A0A286ZTV6	SUMF1	-0.0273	0.951	0.973	FALSE	FALSE	FALSE	12
F1S8X2	CRTAC1	-0.0272	0.88	0.971	FALSE	FALSE	FALSE	0
Q9MZ15	VDAC2	-0.0268	0.975	0.974	FALSE	FALSE	FALSE	12
O02773	MAN1A1	-0.0265	0.932	0.973	FALSE	FALSE	FALSE	0
A0A287A5V7	APLP2	-0.0262	0.868	0.971	FALSE	FALSE	FALSE	0
I3LTK9	CEL	-0.0262	0.963	0.973	FALSE	FALSE	FALSE	14
F1SC57	PLTP	-0.0258	0.945	0.973	FALSE	FALSE	FALSE	0
A0A5K1UB60	ALCAM	-0.0245	0.929	0.973	FALSE	FALSE	FALSE	0
A0A8W4F8A6	C9	-0.024	0.9	0.972	FALSE	FALSE	FALSE	0
Q59IP2	COL5A2	-0.0237	0.919	0.972	FALSE	FALSE	FALSE	0
F1RRW5	ACE	-0.0233	0.948	0.973	FALSE	FALSE	FALSE	2
A0A5G2Q8I9	A2M	-0.0221	0.89	0.971	FALSE	FALSE	FALSE	0
F1SJ93	RCN2	-0.0218	0.945	0.973	FALSE	FALSE	FALSE	7
A0A287B6Q2	CD55	-0.0216	0.911	0.972	FALSE	FALSE	FALSE	0
P00791	PGA	-0.021	0.944	0.973	FALSE	FALSE	FALSE	0
A0A8W4FJT4	NID2	-0.0208	0.923	0.972	FALSE	FALSE	FALSE	0
Q04967	HSPA6	-0.0208	0.953	0.973	FALSE	FALSE	FALSE	5
Q29221	CAPZA2	-0.0208	0.96	0.973	FALSE	FALSE	FALSE	7
A0A5G2R0I4	ORM1	-0.02	0.942	0.973	FALSE	FALSE	FALSE	0
K7GT29	IL17RA	-0.0191	0.966	0.974	FALSE	FALSE	FALSE	7
I3L893	GDI1	-0.0171	0.984	0.974	FALSE	FALSE	FALSE	17
A0A5G2QJ28	NASP	-0.0161	0.946	0.973	FALSE	FALSE	FALSE	0
I3LKV5	ADAMTS13	-0.0159	0.926	0.972	FALSE	FALSE	FALSE	0
F1SGT4	CD44	-0.0158	0.913	0.972	FALSE	FALSE	FALSE	0
A0A287B639	SSH3	-0.0157	0.976	0.974	FALSE	FALSE	FALSE	9
A0A287ATF0	COLEC10	-0.015	0.923	0.972	FALSE	FALSE	FALSE	0
A0A286ZP75	IGDCC4	-0.0139	0.929	0.972	FALSE	FALSE	FALSE	0
F1SPJ1	MMP19	-0.0137	0.938	0.973	FALSE	FALSE	FALSE	0
F1RT67	BPNT2	-0.0132	0.97	0.974	FALSE	FALSE	FALSE	6
A0A5G2QN69	MEPE	-0.0129	0.978	0.974	FALSE	FALSE	FALSE	7
I3LFR7	DPEP2	-0.0125	0.96	0.973	FALSE	FALSE	FALSE	1
F1RLC4	LOX	-0.0122	0.943	0.973	FALSE	FALSE	FALSE	0
F1RX37	FGB	-0.0119	0.948	0.973	FALSE	FALSE	FALSE	0
A0A8W4FI56	RAC1	-0.0117	0.963	0.974	FALSE	FALSE	FALSE	0
A0A8W4FR49	PSMC3	-0.0114	0.969	0.974	FALSE	FALSE	FALSE	2
K9J4T3	ANTXR2	-0.0108	0.959	0.973	FALSE	FALSE	FALSE	3
A0A287AIM8	C5	-0.0096	0.943	0.973	FALSE	FALSE	FALSE	0
A0A4X1U8B7	MMP2	-0.0095	0.957	0.973	FALSE	FALSE	FALSE	0
F1SJU4	PARVB	-0.00844	0.98	0.974	FALSE	FALSE	FALSE	1
F1RQP6	F1RQP6	-0.0082	0.973	0.974	FALSE	FALSE	FALSE	5
P50447	SERPINA1	-0.00805	0.957	0.973	FALSE	FALSE	FALSE	0
A0A8D0VJ81	GANAB	-0.00803	0.969	0.974	FALSE	FALSE	FALSE	0
A0A287BSF6	GBP1	-0.00802	0.986	0.974	FALSE	FALSE	FALSE	5
A0A8W4F8B6	CRTAP	-0.00778	0.99	0.974	FALSE	FALSE	FALSE	14
F1RUE4	GPLD1	-0.00697	0.975	0.974	FALSE	FALSE	FALSE	0
A0A286ZVW4	NADK	-0.00569	0.981	0.974	FALSE	FALSE	FALSE	4
F1RM55	MAN2A1	-0.00552	0.964	0.974	FALSE	FALSE	FALSE	0
F1RGX2	FAM234A	-0.00496	0.988	0.974	FALSE	FALSE	FALSE	7
Q2EN76	NME2	-0.0047	0.984	0.974	FALSE	FALSE	FALSE	0
F1RI64	CHST12	-0.00437	0.982	0.974	FALSE	FALSE	FALSE	0
K7GPS0	MAP2K2	-0.00405	0.987	0.974	FALSE	FALSE	FALSE	3
P17741	HMGB2	-0.00401	0.99	0.974	FALSE	FALSE	FALSE	1
A0A4X1T674	GLCE	-0.0037	0.996	0.974	FALSE	FALSE	FALSE	14
A0A287B762	ENPP2	-0.00334	0.985	0.974	FALSE	FALSE	FALSE	0
A0A4X1SIN4	IL6ST	-0.00301	0.992	0.974	FALSE	FALSE	FALSE	5
A0A286ZSQ8	ST6GAL1	-0.00299	0.992	0.974	FALSE	FALSE	FALSE	2
A0A8X9AEV4	FCGR2B	-0.0027	0.994	0.974	FALSE	FALSE	FALSE	2
P12263	F8	-0.00267	0.996	0.974	FALSE	FALSE	FALSE	14
A0A5G2QGZ8	BSG	-0.00186	0.993	0.974	FALSE	FALSE	FALSE	0
I3LLD2	OLFM1	-0.00175	0.994	0.974	FALSE	FALSE	FALSE	3
A0A8W4FC14	LOC100125542	-0.00136	0.995	0.974	FALSE	FALSE	FALSE	0
I3LIF2	CLSTN1	-0.000885	0.995	0.974	FALSE	FALSE	FALSE	0
Q2PYM7	PSMB9	-0.000822	0.997	0.974	FALSE	FALSE	FALSE	0
Q9XSD9	DCN	-0.000812	0.997	0.974	FALSE	FALSE	FALSE	0
A0A287B1U6	NELL2	0.000365	0.999	0.974	FALSE	FALSE	FALSE	0
Q28985	IGFBP5	0.00069	0.998	0.974	FALSE	FALSE	FALSE	0
Q6YT39	LTF	0.000743	0.998	0.974	FALSE	FALSE	FALSE	8
I3LEB7	PODN	0.00106	0.994	0.974	FALSE	FALSE	FALSE	0
A0A5G2R7P3	LTBP2	0.0013	0.995	0.974	FALSE	FALSE	FALSE	0
A0A286ZTG3	WAS	0.00247	0.992	0.974	FALSE	FALSE	FALSE	0
F1SDV5	EMILIN3	0.00255	0.988	0.974	FALSE	FALSE	FALSE	0
F1SUW3	EFHD2	0.00452	0.993	0.974	FALSE	FALSE	FALSE	11
A0A287AZ66	ITGB5	0.00683	0.984	0.974	FALSE	FALSE	FALSE	12
A0A8D1DJI5	TCP1	0.00694	0.982	0.974	FALSE	FALSE	FALSE	3
A0A287BM29	APOA4	0.00729	0.968	0.974	FALSE	FALSE	FALSE	0
A0A288CG53	SELL	0.00748	0.98	0.974	FALSE	FALSE	FALSE	0
Q5PXD3	CD3G	0.00805	0.987	0.974	FALSE	FALSE	FALSE	10
A0A481C216	RUVBL2	0.00858	0.982	0.974	FALSE	FALSE	FALSE	9
A0A287AEK2	PRKAR2A	0.0091	0.981	0.974	FALSE	FALSE	FALSE	7
A0A4X1SVF9	POSTN	0.00927	0.984	0.974	FALSE	FALSE	FALSE	0
A0A4X1WBI1	KRT8	0.00984	0.99	0.974	FALSE	FALSE	FALSE	2
G9F6X8	P4HB	0.0108	0.945	0.973	FALSE	FALSE	FALSE	0
A0A287AR98	SBSN	0.0109	0.976	0.974	FALSE	FALSE	FALSE	2
A0A287AYB4	PDGFRA	0.0115	0.939	0.973	FALSE	FALSE	FALSE	0
F1SLV7	C1RL	0.0126	0.948	0.973	FALSE	FALSE	FALSE	0
F1S268	CREG1	0.0129	0.956	0.973	FALSE	FALSE	FALSE	0
A0A4X1W3F8	ALPL	0.0131	0.943	0.973	FALSE	FALSE	FALSE	0
A0A286ZY04	LRRC4B	0.0136	0.981	0.974	FALSE	FALSE	FALSE	13
F1SR53	ITGA5	0.014	0.946	0.973	FALSE	FALSE	FALSE	1
A0A5G2R8T9	C6	0.0143	0.932	0.973	FALSE	FALSE	FALSE	0
A0A5K1V8G3	FCGRT	0.0144	0.973	0.974	FALSE	FALSE	FALSE	8
F1S4U8	PKDCC	0.0152	0.931	0.973	FALSE	FALSE	FALSE	0
A0A8D1APX5	LOC110258309	0.016	0.939	0.973	FALSE	FALSE	FALSE	0
F2Z5K2	PSMA5	0.016	0.924	0.972	FALSE	FALSE	FALSE	0
F1SJ86	CSPG4	0.0162	0.929	0.973	FALSE	FALSE	FALSE	0
O46409	APOA4	0.0163	0.917	0.972	FALSE	FALSE	FALSE	0
A0A287BK35	COL6A5	0.0169	0.923	0.972	FALSE	FALSE	FALSE	0
F1SUE4	ASPN	0.0171	0.908	0.972	FALSE	FALSE	FALSE	0
A0A287BJW1	SMPDL3B	0.0179	0.95	0.973	FALSE	FALSE	FALSE	3
A0A4X1U5W0	MFGE8	0.0189	0.918	0.972	FALSE	FALSE	FALSE	0
A0A287A191	DSC2	0.0192	0.923	0.972	FALSE	FALSE	FALSE	0
P79263	ITIH4	0.0202	0.956	0.973	FALSE	FALSE	FALSE	0
A0A287BM11	LOC100156325	0.0205	0.961	0.973	FALSE	FALSE	FALSE	0
F1RK01	CPB2	0.0212	0.935	0.973	FALSE	FALSE	FALSE	0
Q866Y3	PGLYRP2	0.0219	0.927	0.972	FALSE	FALSE	FALSE	0
A0A287A9U5	PCDHGB1	0.0223	0.952	0.973	FALSE	FALSE	FALSE	5
I3LU40	FAM20C	0.0232	0.917	0.972	FALSE	FALSE	FALSE	0
Q68RU1	ApoN	0.0235	0.89	0.971	FALSE	FALSE	FALSE	0
I3LSA5	I3LSA5	0.0236	0.938	0.973	FALSE	FALSE	FALSE	5
Q1KS52	IGFALS	0.0238	0.922	0.972	FALSE	FALSE	FALSE	0
A0A5G2QWN3	ABI3BP	0.0241	0.928	0.972	FALSE	FALSE	FALSE	0
F1SBI6	OTOR	0.0245	0.912	0.972	FALSE	FALSE	FALSE	0
A0A287AM26	RNPEP	0.0255	0.915	0.972	FALSE	FALSE	FALSE	0
A0A4X1UWJ9	HSPA4	0.0257	0.891	0.971	FALSE	FALSE	FALSE	0
F1RX36	FGA	0.0261	0.884	0.971	FALSE	FALSE	FALSE	0
A0A287A016	PLXDC2	0.0269	0.878	0.971	FALSE	FALSE	FALSE	0
I3L9F5	PCYOX1	0.0271	0.91	0.972	FALSE	FALSE	FALSE	1
I3LPH5	G3BP2	0.0279	0.956	0.973	FALSE	FALSE	FALSE	13
A0A8D1QR27	CCT5	0.0282	0.912	0.972	FALSE	FALSE	FALSE	3
A0A287A2R9	YWHAE	0.0283	0.879	0.971	FALSE	FALSE	FALSE	0
P67985	RPL22	0.0289	0.969	0.974	FALSE	FALSE	FALSE	14
F1RQU2	HSP90AB1	0.0302	0.865	0.97	FALSE	FALSE	FALSE	0
F1SLI0	PLXNB1	0.0307	0.856	0.97	FALSE	FALSE	FALSE	0
A0A287AAZ9	CFB	0.031	0.851	0.97	FALSE	FALSE	FALSE	0
P02550	TUBA1A	0.0318	0.936	0.973	FALSE	FALSE	FALSE	6
P20305	GSN	0.0328	0.886	0.971	FALSE	FALSE	FALSE	0
Q8HZJ6	SDC4	0.0329	0.966	0.974	FALSE	FALSE	FALSE	8
F1SUE2	OMD	0.0337	0.82	0.969	FALSE	FALSE	FALSE	0
A0A8W4FKK7	AXL	0.0344	0.838	0.969	FALSE	FALSE	FALSE	0
F1SAE9	LAMB1	0.0353	0.828	0.969	FALSE	FALSE	FALSE	0
F1SGH0	PTPRG	0.0361	0.868	0.971	FALSE	FALSE	FALSE	0
A0A287BAR8	ST8SIA4	0.0363	0.835	0.969	FALSE	FALSE	FALSE	0
A0A286ZZ97	CAVIN1	0.0377	0.901	0.972	FALSE	FALSE	FALSE	2
P62197	PSMC5	0.0377	0.868	0.971	FALSE	FALSE	FALSE	0
A0A287AJ51	AGT	0.0389	0.817	0.969	FALSE	FALSE	FALSE	0
F1REZ1	HAPLN1	0.0395	0.877	0.971	FALSE	FALSE	FALSE	0
A0A287AXL0	CPAMD8	0.0398	0.903	0.972	FALSE	FALSE	FALSE	6
A0A4X1SUA0	SRSF3	0.0417	0.919	0.972	FALSE	FALSE	FALSE	8
A0A5G2QPJ4	CADM1	0.0417	0.862	0.97	FALSE	FALSE	FALSE	0
Q29594	CKB	0.0417	0.914	0.972	FALSE	FALSE	FALSE	0
A0A8D1KX76	LOC100739644	0.0419	0.933	0.973	FALSE	FALSE	FALSE	10
F1SPG5	FBLN2	0.0426	0.837	0.969	FALSE	FALSE	FALSE	0
F1SMF4	ITGA2	0.0427	0.844	0.97	FALSE	FALSE	FALSE	0
A0A4X1W843	A0A4X1W843	0.0428	0.846	0.97	FALSE	FALSE	FALSE	0
A0A287AHK1	GC	0.0432	0.805	0.968	FALSE	FALSE	FALSE	0
A0A287AJK1	ATP6AP2	0.0433	0.872	0.971	FALSE	FALSE	FALSE	0
P10775	RNH1	0.0433	0.894	0.971	FALSE	FALSE	FALSE	1
A0A5G2QQ60	ADGRG2	0.0439	0.901	0.972	FALSE	FALSE	FALSE	3
P02543	VIM	0.0439	0.792	0.968	FALSE	FALSE	FALSE	0
A5GFY8	PHGDH	0.0446	0.959	0.973	FALSE	FALSE	FALSE	17
P28839	LAP3	0.0448	0.959	0.973	FALSE	FALSE	FALSE	17
A0A4X1TSB0	EXTL2	0.0454	0.772	0.967	FALSE	FALSE	FALSE	0
A0A4X1W1D7	NUCB1	0.0455	0.872	0.971	FALSE	FALSE	FALSE	0
F1SQX9	APOD	0.0463	0.8	0.968	FALSE	FALSE	FALSE	0
A0A5G2QPE1	CAPN2	0.0466	0.725	0.965	FALSE	FALSE	FALSE	0
Q71LE2	H3-3A	0.0468	0.938	0.973	FALSE	FALSE	FALSE	2
P35054	TGFBR3	0.047	0.878	0.971	FALSE	FALSE	FALSE	1
A0A286ZP67	HNRNPU	0.0472	0.878	0.971	FALSE	FALSE	FALSE	0
A0A5G2RMJ1	FOLR1	0.0472	0.896	0.971	FALSE	FALSE	FALSE	0
F1SM61	FBLN1	0.0476	0.802	0.968	FALSE	FALSE	FALSE	0
I3LDA5	EHD4	0.049	0.89	0.971	FALSE	FALSE	FALSE	0
A0A5G2Q812	SNED1	0.0492	0.859	0.97	FALSE	FALSE	FALSE	2
F6QA08	PDIA3	0.0496	0.753	0.966	FALSE	FALSE	FALSE	0
A0A287BD18	CFH	0.0498	0.752	0.966	FALSE	FALSE	FALSE	0
A0A287BA27	VLDLR	0.0511	0.714	0.964	FALSE	FALSE	FALSE	0
F1RW75	DSP	0.0519	0.935	0.973	FALSE	FALSE	FALSE	7
A0A287AAI1	CLEC11A	0.0524	0.779	0.967	FALSE	FALSE	FALSE	0
K7GQJ1	FGFR1	0.0534	0.752	0.966	FALSE	FALSE	FALSE	0
A0A4X1T0H0	RPL10A	0.0538	0.84	0.97	FALSE	FALSE	FALSE	0
F1S1C9	OLFML2B	0.0546	0.791	0.968	FALSE	FALSE	FALSE	0
F1SMY0	CDH19	0.0552	0.784	0.967	FALSE	FALSE	FALSE	0
A0A286ZW70	PPIB	0.056	0.843	0.97	FALSE	FALSE	FALSE	0
M3TYR7	NAPRT1	0.0561	0.815	0.969	FALSE	FALSE	FALSE	0
F1RPE4	TCN2	0.0565	0.859	0.97	FALSE	FALSE	FALSE	0
F1S596	PRKCSH	0.0566	0.78	0.967	FALSE	FALSE	FALSE	0
I3LCR6	CDH3	0.0569	0.941	0.973	FALSE	FALSE	FALSE	14
A0A286ZS39	AGRN	0.0574	0.743	0.965	FALSE	FALSE	FALSE	0
P20735	GGT1	0.0574	0.709	0.964	FALSE	FALSE	FALSE	0
A0A5G2QHU5	EHBP1L1	0.0584	0.871	0.971	FALSE	FALSE	FALSE	7
Q06AS8	GNAI3	0.0586	0.917	0.972	FALSE	FALSE	FALSE	13
A0A5G2R7M3	ITIH4	0.0587	0.882	0.971	FALSE	FALSE	FALSE	0
A0A286ZL46	FCER2	0.0598	0.673	0.962	FALSE	FALSE	FALSE	0
A0A8W4FHP1	A0A8W4FHP1	0.0604	0.791	0.968	FALSE	FALSE	FALSE	1
A0A480DSI2	CHST15	0.062	0.703	0.963	FALSE	FALSE	FALSE	0
A0A287AQR8	HSPB6	0.0623	0.943	0.973	FALSE	FALSE	FALSE	17
Q29201	RPS16	0.0626	0.927	0.972	FALSE	FALSE	FALSE	12
K7GKY0	CD109	0.0627	0.65	0.96	FALSE	FALSE	FALSE	0
A0A5G2QXC2	PCDH7	0.0637	0.702	0.963	FALSE	FALSE	FALSE	0
Q2F7Z7	TMEM59	0.0643	0.906	0.972	FALSE	FALSE	FALSE	10
F1S7Z7	ANGPTL3	0.0645	0.773	0.967	FALSE	FALSE	FALSE	0
A0A8W4FMW6	HSPD1	0.065	0.902	0.972	FALSE	FALSE	FALSE	2
F1SGP8	RCN1	0.0652	0.807	0.968	FALSE	FALSE	FALSE	0
A0A287BDL6	TPM3	0.0654	0.792	0.968	FALSE	FALSE	FALSE	1
A0A287AQ03	CDH16	0.0667	0.842	0.97	FALSE	FALSE	FALSE	3
A0A8W4FDT9	C3	0.0669	0.632	0.959	FALSE	FALSE	FALSE	0
A0A287BPL8	CDH1	0.0677	0.691	0.963	FALSE	FALSE	FALSE	0
A0A5G2QES1	NPEPPS	0.0678	0.81	0.968	FALSE	FALSE	FALSE	0
P00636	FBP1	0.0688	0.846	0.97	FALSE	FALSE	FALSE	0
A0A286ZSJ7	C1QC	0.0693	0.739	0.965	FALSE	FALSE	FALSE	0
A0A480DPE1	G3BP1	0.0693	0.792	0.968	FALSE	FALSE	FALSE	0
Q95250	PGRMC1	0.0695	0.768	0.967	FALSE	FALSE	FALSE	0
I3L812	TPP1	0.0697	0.858	0.97	FALSE	FALSE	FALSE	3
F1S021	COL5A1	0.0703	0.715	0.964	FALSE	FALSE	FALSE	0
A0A5G2RE32	NRP1	0.0705	0.622	0.958	FALSE	FALSE	FALSE	0
D0G0C8	CCT2	0.0708	0.806	0.968	FALSE	FALSE	FALSE	3
A0A8D1LFT0	CP	0.0714	0.647	0.96	FALSE	FALSE	FALSE	0
A0A287B4F5	DBN1	0.0721	0.835	0.969	FALSE	FALSE	FALSE	0
A0A286ZZT8	CCDC126	0.0725	0.881	0.971	FALSE	FALSE	FALSE	1
A0A8D1VS88	NTRK2	0.0728	0.79	0.967	FALSE	FALSE	FALSE	0
I3LNY6	NES	0.0732	0.817	0.969	FALSE	FALSE	FALSE	1
A0A287B5D6	ANKFY1	0.0737	0.93	0.973	FALSE	FALSE	FALSE	10
A0A287A6Q0	PROS1	0.0742	0.6	0.957	FALSE	FALSE	FALSE	0
F1SMW9	PSMD1	0.0754	0.842	0.97	FALSE	FALSE	FALSE	0
K7GM40	APOA1	0.0756	0.573	0.955	FALSE	FALSE	FALSE	0
A0A287ARZ5	PDXDC1	0.0761	0.914	0.972	FALSE	FALSE	FALSE	14
Q29549	CLU	0.0766	0.628	0.959	FALSE	FALSE	FALSE	0
P51779	CFD	0.0767	0.735	0.965	FALSE	FALSE	FALSE	0
A0A287ADT3	BCL2L15	0.0769	0.859	0.97	FALSE	FALSE	FALSE	8
K7GLC0	IL7R	0.0783	0.846	0.97	FALSE	FALSE	FALSE	5
A0A287B5T6	ARF1	0.0784	0.766	0.966	FALSE	FALSE	FALSE	0
F1S3J9	ICAM1	0.0784	0.865	0.97	FALSE	FALSE	FALSE	7
F1SCU3	MATN3	0.0785	0.82	0.969	FALSE	FALSE	FALSE	7
Q95334	ENPEP	0.0787	0.825	0.969	FALSE	FALSE	FALSE	12
A0A287BJ64	AZGP1	0.0808	0.698	0.963	FALSE	FALSE	FALSE	0
A0A5G2RDK0	ARMH4	0.081	0.602	0.957	FALSE	FALSE	FALSE	0
Q29052	ITIH1	0.0812	0.816	0.969	FALSE	FALSE	FALSE	0
B9V4F0	ARF5	0.0817	0.773	0.967	FALSE	FALSE	FALSE	0
A0A8W4FQE3	PCNA	0.0821	0.859	0.97	FALSE	FALSE	FALSE	6
P04574	CAPNS1	0.0836	0.671	0.962	FALSE	FALSE	FALSE	0
A0A8D1YIJ1	VCP	0.0838	0.791	0.968	FALSE	FALSE	FALSE	2
O19112	CILP	0.0839	0.73	0.965	FALSE	FALSE	FALSE	0
O02668	ITIH2	0.0841	0.587	0.956	FALSE	FALSE	FALSE	0
A0A287ASJ8	CHL1	0.0844	0.682	0.962	FALSE	FALSE	FALSE	0
A0A480P2S5	SERPINC1	0.0847	0.587	0.956	FALSE	FALSE	FALSE	0
A0A5G2QD63	COL9A1	0.0848	0.722	0.964	FALSE	FALSE	FALSE	0
F1RYU9	USO1	0.0848	0.749	0.966	FALSE	FALSE	FALSE	1
I3LS26	PSAP	0.0849	0.751	0.966	FALSE	FALSE	FALSE	0
A0A4X1SPI6	CSNK2A1	0.0851	0.883	0.971	FALSE	FALSE	FALSE	9
P31936	IBSP	0.0854	0.799	0.968	FALSE	FALSE	FALSE	0
F1S5K0	PPM1B	0.086	0.647	0.96	FALSE	FALSE	FALSE	3
A0A5G2QUG9	EEF1D	0.0863	0.742	0.965	FALSE	FALSE	FALSE	0
D2WL18	FBXO7	0.087	0.795	0.968	FALSE	FALSE	FALSE	4
P45846	DPT	0.0873	0.586	0.956	FALSE	FALSE	FALSE	0
Q9GLG4	CHGB	0.0874	0.6	0.957	FALSE	FALSE	FALSE	0
K7GL28	MPP1	0.0883	0.66	0.961	FALSE	FALSE	FALSE	0
A0A4X1V2W3	EEF1B2	0.0888	0.772	0.967	FALSE	FALSE	FALSE	0
P01025	C3	0.0892	0.788	0.967	FALSE	FALSE	FALSE	0
A0A287B9B9	IL1RAP	0.0895	0.611	0.958	FALSE	FALSE	FALSE	0
A0A286ZQJ9	LOC110258310	0.0903	0.594	0.956	FALSE	FALSE	FALSE	0
A0A287AT82	ASPH	0.0909	0.701	0.963	FALSE	FALSE	FALSE	1
F1STC3	F1STC3	0.0912	0.848	0.97	FALSE	FALSE	FALSE	0
A0A5G2QNM8	COPG1	0.0915	0.744	0.965	FALSE	FALSE	FALSE	4
Q29243	DAG1	0.0918	0.558	0.953	FALSE	FALSE	FALSE	0
A0A5G2Q7I8	TWF2	0.092	0.888	0.971	FALSE	FALSE	FALSE	12
Q9TVC1	ATP6V1H	0.0925	0.832	0.969	FALSE	FALSE	FALSE	6
F1RWK7	PLXDC1	0.0927	0.683	0.962	FALSE	FALSE	FALSE	0
F1RN40	F7	0.0933	0.534	0.951	FALSE	FALSE	FALSE	0
A0A5G2RIA8	PROC	0.0934	0.538	0.952	FALSE	FALSE	FALSE	0
F1S567	VCAM1	0.0935	0.625	0.959	FALSE	FALSE	FALSE	0
P10669	FST	0.0941	0.835	0.969	FALSE	FALSE	FALSE	0
P03974	VCP	0.0943	0.74	0.965	FALSE	FALSE	FALSE	0
A0A5G2R5U8	NACA	0.095	0.643	0.96	FALSE	FALSE	FALSE	0
F1S0V3	ANXA6	0.0951	0.79	0.967	FALSE	FALSE	FALSE	8
A0A4X1SU02	ATG3	0.0953	0.76	0.966	FALSE	FALSE	FALSE	0
F1SB67	IGF2R	0.0957	0.661	0.961	FALSE	FALSE	FALSE	0
F2Z5J9	RAB11B	0.0958	0.736	0.965	FALSE	FALSE	FALSE	3
A0A287APG4	A0A287APG4	0.0969	0.792	0.967	FALSE	FALSE	FALSE	10
A0A286ZXM0	AHNAK2	0.0971	0.815	0.968	FALSE	FALSE	FALSE	7
A0A287AP73	ITIH3	0.0973	0.617	0.958	FALSE	FALSE	FALSE	0
Q19AZ8	F2	0.0977	0.495	0.947	FALSE	FALSE	FALSE	0
F1RQI0	COL12A1	0.098	0.672	0.962	FALSE	FALSE	FALSE	0
P54612	PPP2R1A	0.0987	0.603	0.957	FALSE	FALSE	FALSE	0
A0A287APN0	CSRP1	0.0991	0.878	0.971	FALSE	FALSE	FALSE	15
A0A287BMX9	NID1	0.0992	0.591	0.956	FALSE	FALSE	FALSE	0
M3TYC1	EIF3B	0.0993	0.636	0.959	FALSE	FALSE	FALSE	2
Q52NJ6	RAB14	0.0998	0.805	0.968	FALSE	FALSE	FALSE	7
P04366	AMBP	0.101	0.429	0.939	FALSE	FALSE	FALSE	0
A0A287ASH2	GALNT15	0.102	0.731	0.965	FALSE	FALSE	FALSE	0
A0A8W4FEQ7	THBD	0.102	0.562	0.954	FALSE	FALSE	FALSE	0
F1RK48	SRL	0.102	0.493	0.947	FALSE	FALSE	FALSE	0
F1RJH8	ASL	0.103	0.802	0.968	FALSE	FALSE	FALSE	0
K7GPB6	NCAM1	0.103	0.443	0.941	FALSE	FALSE	FALSE	0
A0A287AEH0	PSMD7	0.104	0.809	0.968	FALSE	FALSE	FALSE	7
I3LB28	NRP2	0.104	0.403	0.935	FALSE	FALSE	FALSE	0
Q95333	XPNPEP2	0.104	0.791	0.967	FALSE	FALSE	FALSE	11
A0A287ATH4	GPC1	0.105	0.54	0.952	FALSE	FALSE	FALSE	0
A0A4X1V4G4	ARHGDIB	0.105	0.825	0.969	FALSE	FALSE	FALSE	12
F1SAD9	PDIA4	0.106	0.552	0.953	FALSE	FALSE	FALSE	0
I3LL31	PDGFC	0.107	0.599	0.957	FALSE	FALSE	FALSE	1
Q711S8	SPP2	0.107	0.546	0.952	FALSE	FALSE	FALSE	0
A0A287A217	TUBB4B	0.108	0.842	0.97	FALSE	FALSE	FALSE	7
A0A8W4FMA6	A0A8W4FMA6	0.108	0.539	0.952	FALSE	FALSE	FALSE	0
F1S982	COPB1	0.108	0.742	0.965	FALSE	FALSE	FALSE	6
F1RM80	KRTDAP	0.109	0.87	0.97	FALSE	FALSE	FALSE	16
A0A286ZJL9	A0A286ZJL9	0.11	0.816	0.969	FALSE	FALSE	FALSE	2
A0A5G2R5Z3	MCAM	0.11	0.717	0.964	FALSE	FALSE	FALSE	6
A0A5G2RD43	LOC110256000	0.11	0.648	0.96	FALSE	FALSE	FALSE	0
A0A8D1CXL9	PRMT5	0.11	0.718	0.964	FALSE	FALSE	FALSE	4
K7GT60	CDK6	0.11	0.91	0.972	FALSE	FALSE	FALSE	16
Q6QR67	RETN	0.11	0.779	0.967	FALSE	FALSE	FALSE	6
F1S902	COMP	0.111	0.532	0.951	FALSE	FALSE	FALSE	0
A0A287AW54	GOLIM4	0.112	0.525	0.95	FALSE	FALSE	FALSE	0
A0A287B9Q3	CNTN1	0.112	0.711	0.964	FALSE	FALSE	FALSE	1
F1SJB5	ANXA1	0.112	0.878	0.971	FALSE	FALSE	FALSE	14
P04404	CHGA	0.112	0.567	0.954	FALSE	FALSE	FALSE	0
A0A4X1UGY3	LCAT	0.113	0.676	0.962	FALSE	FALSE	FALSE	0
F1RVI6	PIP4K2A	0.113	0.788	0.967	FALSE	FALSE	FALSE	12
F1SBZ9	THBS2	0.114	0.458	0.943	FALSE	FALSE	FALSE	0
A0A286ZQ85	COL3A1	0.115	0.753	0.966	FALSE	FALSE	FALSE	10
F1SN67	FBN1	0.116	0.601	0.957	FALSE	FALSE	FALSE	0
F1SN81	EGFLAM	0.116	0.679	0.962	FALSE	FALSE	FALSE	0
A0A287AU89	PCDH1	0.117	0.594	0.956	FALSE	FALSE	FALSE	0
F1SQ09	LUM	0.117	0.452	0.942	FALSE	FALSE	FALSE	0
Q29545	INHCA	0.119	0.469	0.944	FALSE	FALSE	FALSE	0
K7GME7	COL11A2	0.12	0.551	0.953	FALSE	FALSE	FALSE	0
A0A287BPI7	TGFBR3	0.121	0.667	0.961	FALSE	FALSE	FALSE	0
F1SNF3	PODXL	0.121	0.657	0.961	FALSE	FALSE	FALSE	0
F6PZL5	DMP1	0.121	0.662	0.961	FALSE	FALSE	FALSE	0
A0A4X1V414	GNB4	0.122	0.838	0.969	FALSE	FALSE	FALSE	14
K9IVR7	WDR1	0.122	0.621	0.958	FALSE	FALSE	FALSE	2
Q5U9S1	MBL1	0.122	0.799	0.968	FALSE	FALSE	FALSE	0
A0A4X1T9E4	CHST3	0.123	0.395	0.933	FALSE	FALSE	FALSE	0
A0A287A0Q2	SDF4	0.125	0.466	0.944	FALSE	FALSE	FALSE	0
A0A287A3T6	A0A287A3T6	0.125	0.827	0.969	FALSE	FALSE	FALSE	7
A0A287BDH4	STK10	0.125	0.844	0.97	FALSE	FALSE	FALSE	12
A0A5G2QCF0	A0A5G2QCF0	0.125	0.464	0.943	FALSE	FALSE	FALSE	0
A0A287B0L6	H2AC11	0.126	0.894	0.971	FALSE	FALSE	FALSE	2
A0A287BB44	MMRN2	0.126	0.76	0.966	FALSE	FALSE	FALSE	13
A0A287BHG0	NRCAM	0.126	0.642	0.96	FALSE	FALSE	FALSE	1
A0A8W4FHP9	FAT4	0.126	0.563	0.954	FALSE	FALSE	FALSE	0
F1S1D2	CTHRC1	0.126	0.48	0.945	FALSE	FALSE	FALSE	0
F1S6B4	PRELP	0.126	0.647	0.96	FALSE	FALSE	FALSE	0
A0A286ZZ23	SCYL1	0.127	0.625	0.958	FALSE	FALSE	FALSE	7
A0A5G2R207	GOLM2	0.127	0.537	0.951	FALSE	FALSE	FALSE	0
F1S7K4	PLIN4	0.128	0.824	0.969	FALSE	FALSE	FALSE	10
A0A4X1TLK4	SPON1	0.129	0.536	0.951	FALSE	FALSE	FALSE	1
F1SAX5	CD58	0.129	0.844	0.969	FALSE	FALSE	FALSE	16
A0A4X1VFJ3	ERP44	0.131	0.364	0.927	FALSE	FALSE	FALSE	0
A0A5G2QHF6	C3H16orf54	0.131	0.837	0.969	FALSE	FALSE	FALSE	7
A0A8W4FC34	NCL	0.131	0.792	0.967	FALSE	FALSE	FALSE	9
O02840	CDH5	0.131	0.698	0.963	FALSE	FALSE	FALSE	0
A0A287AJI4	SERPINF2	0.132	0.746	0.965	FALSE	FALSE	FALSE	0
A0A287BQA7	SORL1	0.132	0.671	0.961	FALSE	FALSE	FALSE	7
A0A5G2QTC8	THBS4	0.132	0.491	0.947	FALSE	FALSE	FALSE	0
F1SIC9	LOXL1	0.132	0.804	0.968	FALSE	FALSE	FALSE	1
F1SR15	KIAA1549	0.133	0.483	0.946	FALSE	FALSE	FALSE	1
I3LS87	VASN	0.133	0.467	0.944	FALSE	FALSE	FALSE	0
P48819	VTN	0.133	0.457	0.943	FALSE	FALSE	FALSE	0
A0A075B7J0	A0A075B7J0	0.134	0.693	0.963	FALSE	FALSE	FALSE	0
A0A4X1UXG0	TFG	0.134	0.73	0.965	FALSE	FALSE	FALSE	9
P79281	PTN	0.134	0.865	0.97	FALSE	FALSE	FALSE	13
A0A287BRL8	MARCKS	0.135	0.655	0.961	FALSE	FALSE	FALSE	0
F1RL75	PDGFRB	0.135	0.339	0.922	FALSE	FALSE	FALSE	0
F1SJZ1	STC2	0.135	0.586	0.956	FALSE	FALSE	FALSE	4
A0A4X1V764	EPB42	0.136	0.799	0.968	FALSE	FALSE	FALSE	12
F1RJC6	MMP23	0.136	0.665	0.961	FALSE	FALSE	FALSE	10
F1SFI6	FETUB	0.137	0.584	0.956	FALSE	FALSE	FALSE	0
K7GR72	SLC4A1	0.137	0.631	0.959	FALSE	FALSE	FALSE	0
A0A5G2QUR1	MIA3	0.138	0.465	0.944	FALSE	FALSE	FALSE	0
F1RMB2	BMP1	0.138	0.56	0.954	FALSE	FALSE	FALSE	0
O19071	MGAT2	0.138	0.309	0.914	FALSE	FALSE	FALSE	0
A0A287A6K7	APMAP	0.139	0.593	0.956	FALSE	FALSE	FALSE	0
A0A287AX76	SYAP1	0.14	0.594	0.956	FALSE	FALSE	FALSE	3
A0A5G2QVD5	COPZ1	0.14	0.784	0.967	FALSE	FALSE	FALSE	9
F2Z505	ETF1	0.14	0.683	0.962	FALSE	FALSE	FALSE	5
A0A5G2QXX3	QSOX1	0.141	0.29	0.908	FALSE	FALSE	FALSE	0
Q863Z0	PSME2	0.141	0.791	0.968	FALSE	FALSE	FALSE	3
A0A286ZTX3	BTD	0.142	0.333	0.92	FALSE	FALSE	FALSE	0
A0A5G2QRI9	DIAPH1	0.143	0.759	0.966	FALSE	FALSE	FALSE	9
F1RRU7	MRC2	0.144	0.667	0.961	FALSE	FALSE	FALSE	6
I3L8B2	COL9A2	0.145	0.471	0.944	FALSE	FALSE	FALSE	0
Q9N1F5	GSTO1	0.145	0.861	0.97	FALSE	FALSE	FALSE	8
A0A8D0QD71	KCNAB2	0.147	0.715	0.964	FALSE	FALSE	FALSE	5
P09571	TF	0.147	0.374	0.929	FALSE	FALSE	FALSE	0
Q9XT90	MMP14	0.147	0.529	0.951	FALSE	FALSE	FALSE	4
F1RFQ7	RAN	0.148	0.575	0.955	FALSE	FALSE	FALSE	0
A0A287BS41	TGFB2	0.149	0.8	0.968	FALSE	FALSE	FALSE	9
F1RNN6	GAL3ST4	0.149	0.575	0.955	FALSE	FALSE	FALSE	3
F1RV24	FAM20A	0.149	0.656	0.96	FALSE	FALSE	FALSE	9
A0A287BN06	PZP	0.15	0.389	0.932	FALSE	FALSE	FALSE	0
A0A287BSE0	ARHGAP30	0.15	0.575	0.955	FALSE	FALSE	FALSE	6
P50828	HPX	0.15	0.332	0.92	FALSE	FALSE	FALSE	0
A0A8D1VQK7	ST13	0.152	0.468	0.944	FALSE	FALSE	FALSE	0
A0A8D1Z4J0	CLEC3A	0.152	0.616	0.958	FALSE	FALSE	FALSE	1
A0A286ZWQ1	LTBP1	0.153	0.281	0.905	FALSE	FALSE	FALSE	0
F1SAM3	CDH2	0.153	0.502	0.948	FALSE	FALSE	FALSE	0
I3LB93	NOTCH3	0.153	0.604	0.957	FALSE	FALSE	FALSE	0
I3LUD1	SOD3	0.153	0.575	0.955	FALSE	FALSE	FALSE	1
P14477	FGB	0.153	0.691	0.963	FALSE	FALSE	FALSE	0
F1SSE8	COL15A1	0.154	0.458	0.943	FALSE	FALSE	FALSE	0
A0A287AMU7	ST3GAL6	0.155	0.33	0.919	FALSE	FALSE	FALSE	0
A0A287AQ20	CFI	0.157	0.339	0.922	FALSE	FALSE	FALSE	0
A0A4X1SMZ2	SDCBP	0.157	0.653	0.96	FALSE	FALSE	FALSE	0
A0A4X1TLW3	PLA2G4A	0.157	0.726	0.964	FALSE	FALSE	FALSE	11
A0A287AYC4	A0A287AYC4	0.158	0.65	0.96	FALSE	FALSE	FALSE	5
A0A287BPE2	CSF1	0.159	0.374	0.929	FALSE	FALSE	FALSE	0
Q06A98	SRSF2	0.159	0.812	0.968	FALSE	FALSE	FALSE	16
A0A286ZHV7	HSPG2	0.16	0.42	0.937	FALSE	FALSE	FALSE	0
A0A287A2E8	MERTK	0.16	0.499	0.948	FALSE	FALSE	FALSE	0
A0A4X1SGC6	SERPINA5	0.16	0.42	0.937	FALSE	FALSE	FALSE	0
A0A5G2QQK1	CCER2	0.16	0.814	0.968	FALSE	FALSE	FALSE	16
F1RMD4	THSD1	0.16	0.531	0.951	FALSE	FALSE	FALSE	1
F1RW98	RSU1	0.16	0.67	0.961	FALSE	FALSE	FALSE	11
Q007T2	CDC42	0.16	0.365	0.927	FALSE	FALSE	FALSE	0
A0A286ZIC1	GSN	0.161	0.673	0.962	FALSE	FALSE	FALSE	2
A0A287AG13	APOB	0.161	0.51	0.949	FALSE	FALSE	FALSE	0
A0A8D2AAA4	HARS1	0.161	0.655	0.96	FALSE	FALSE	FALSE	7
A0A8W4FMQ4	KCTD12	0.161	0.616	0.958	FALSE	FALSE	FALSE	0
A0A287B8D1	ADGRG6	0.162	0.482	0.946	FALSE	FALSE	FALSE	2
A0A8W4FJA1	A0A8W4FJA1	0.162	0.889	0.971	FALSE	FALSE	FALSE	0
A0A287BQK7	PTPRZ1	0.163	0.324	0.918	FALSE	FALSE	FALSE	0
F1RN41	F10	0.163	0.424	0.938	FALSE	FALSE	FALSE	0
I3LUI4	TNC	0.163	0.411	0.936	FALSE	FALSE	FALSE	0
A0A286ZUT9	ADAMDEC1	0.164	0.391	0.932	FALSE	FALSE	FALSE	0
A0A8D1MGX5	DYNLRB1	0.165	0.749	0.965	FALSE	FALSE	FALSE	13
A0A5G2R880	THBS3	0.166	0.436	0.94	FALSE	FALSE	FALSE	0
I3LNV9	CLEC1B	0.166	0.8	0.968	FALSE	FALSE	FALSE	15
Q5XW65	BPIFA1	0.166	0.696	0.963	FALSE	FALSE	FALSE	6
A0A8W4FHV2	PLA2G7	0.168	0.358	0.926	FALSE	FALSE	FALSE	0
I3LD72	EHD2	0.168	0.538	0.952	FALSE	FALSE	FALSE	0
P28491	CALR	0.168	0.447	0.941	FALSE	FALSE	FALSE	0
Q3HUX1	CD36	0.168	0.669	0.961	FALSE	FALSE	FALSE	9
A0A286ZU78	NOTUM	0.169	0.392	0.933	FALSE	FALSE	FALSE	0
A0A8W4F8S7	GAS1	0.169	0.344	0.923	FALSE	FALSE	FALSE	0
A0A8W4FBM7	HEG1	0.169	0.372	0.929	FALSE	FALSE	FALSE	0
A0A287ATP9	UBA5	0.17	0.588	0.956	FALSE	FALSE	FALSE	6
A0A287AEM7	CELSR2	0.172	0.536	0.951	FALSE	FALSE	FALSE	1
A0A5G2QM06	FBN2	0.172	0.67	0.961	FALSE	FALSE	FALSE	0
Q9GL51	PAFAH1B1	0.172	0.39	0.932	FALSE	FALSE	FALSE	4
A0A5G2QTP8	LOC110260994	0.176	0.812	0.968	FALSE	FALSE	FALSE	14
F1RUM1	AFM	0.176	0.346	0.923	FALSE	FALSE	FALSE	0
F1SFI7	AHSG	0.176	0.474	0.945	FALSE	FALSE	FALSE	0
F1SGE7	ITGB7	0.176	0.555	0.953	FALSE	FALSE	FALSE	0
F1SCC9	LOC106504545	0.177	0.45	0.942	FALSE	FALSE	FALSE	0
I3LCK1	LRRC15	0.177	0.485	0.946	FALSE	FALSE	FALSE	0
I3LKJ7	I3LKJ7	0.177	0.683	0.962	FALSE	FALSE	FALSE	0
I3L769	P4HA2	0.178	0.514	0.949	FALSE	FALSE	FALSE	1
I3LQI9	RAP1GDS1	0.178	0.75	0.966	FALSE	FALSE	FALSE	8
Q864U6	B3GALNT1	0.18	0.502	0.948	FALSE	FALSE	FALSE	6
A0A287BBF2	UBASH3B	0.182	0.618	0.958	FALSE	FALSE	FALSE	4
Q9BDY7	ANGPT2	0.183	0.362	0.927	FALSE	FALSE	FALSE	1
A0A286ZIL6	BOD1L1	0.184	0.617	0.958	FALSE	FALSE	FALSE	9
A0A481CQ30	NAP1L4	0.184	0.534	0.951	FALSE	FALSE	FALSE	0
P02554	P02554	0.184	0.666	0.961	FALSE	FALSE	FALSE	6
P20112	SPARC	0.184	0.387	0.932	FALSE	FALSE	FALSE	0
F1RYZ0	RPLP2	0.185	0.321	0.917	FALSE	FALSE	FALSE	0
Q9GK37	Serpina6	0.185	0.461	0.943	FALSE	FALSE	FALSE	0
A0A480L8N8	KAZALD1	0.186	0.357	0.926	FALSE	FALSE	FALSE	0
P12675	CAST	0.186	0.691	0.962	FALSE	FALSE	FALSE	13
T1UNN8	ANGPTL8	0.186	0.695	0.963	FALSE	FALSE	FALSE	4
F1SGD7	NAP1L1	0.187	0.433	0.939	FALSE	FALSE	FALSE	0
A0A287B863	ACAN	0.188	0.344	0.923	FALSE	FALSE	FALSE	0
Q29092	HSP90B1	0.188	0.191	0.858	FALSE	FALSE	FALSE	0
A0A4X1W928	CCT7	0.189	0.613	0.957	FALSE	FALSE	FALSE	8
F1S6B5	FMOD	0.189	0.265	0.899	FALSE	FALSE	FALSE	0
F1SUG4	ELOB	0.189	0.463	0.943	FALSE	FALSE	FALSE	4
I3LAM6	HS6ST1	0.189	0.589	0.956	FALSE	FALSE	FALSE	5
A0A287AJ61	ANKRD13A	0.191	0.79	0.967	FALSE	FALSE	FALSE	14
A0A287AYJ5	GAS6	0.191	0.298	0.91	FALSE	FALSE	FALSE	0
F1RFU7	CDH11	0.191	0.525	0.95	FALSE	FALSE	FALSE	0
A0A287A461	CHAD	0.195	0.4	0.934	FALSE	FALSE	FALSE	0
A0A287AIJ3	GPX3	0.196	0.437	0.94	FALSE	FALSE	FALSE	0
A0A287B771	RPS4X	0.196	0.717	0.964	FALSE	FALSE	FALSE	7
A0A5G2QNN7	CNRIP1	0.196	0.853	0.97	FALSE	FALSE	FALSE	16
A0A287BJF3	BZW1	0.197	0.585	0.955	FALSE	FALSE	FALSE	8
F1RG83	SEZ6L	0.197	0.242	0.889	FALSE	FALSE	FALSE	0
P49923	LPL	0.197	0.471	0.944	FALSE	FALSE	FALSE	0
A0A286ZIM2	CD96	0.198	0.545	0.952	FALSE	FALSE	FALSE	1
A0A4X1SHC0	ANP32E	0.199	0.7	0.963	FALSE	FALSE	FALSE	9
O02705	HSP90AA1	0.199	0.273	0.902	FALSE	FALSE	FALSE	0
A0A4X1SY72	TPST1	0.2	0.427	0.938	FALSE	FALSE	FALSE	0
A0A5G2QRW3	HBB	0.2	0.669	0.961	FALSE	FALSE	FALSE	0
O97507	F12	0.201	0.35	0.924	FALSE	FALSE	FALSE	0
A0A5G2R2T5	SLC3A2	0.202	0.324	0.917	FALSE	FALSE	FALSE	4
A0A287AY31	A0A287AY31	0.208	0.354	0.925	FALSE	FALSE	FALSE	1
A0A286ZNE4	SUSD5	0.209	0.214	0.874	FALSE	FALSE	FALSE	0
A0A8D0X6M2	ECM2	0.209	0.227	0.881	FALSE	FALSE	FALSE	0
P27485	RBP4	0.21	0.199	0.864	FALSE	FALSE	FALSE	0
A0A287BHV6	PTPRS	0.211	0.647	0.959	FALSE	FALSE	FALSE	14
P42098	ZP3	0.211	0.618	0.958	FALSE	FALSE	FALSE	3
F1RTB4	WFIKKN2	0.212	0.742	0.965	FALSE	FALSE	FALSE	15
A0A8D1IV93	IQGAP1	0.213	0.487	0.946	FALSE	FALSE	FALSE	3
A0A287BKE8	H6PD	0.214	0.2	0.865	FALSE	FALSE	FALSE	0
A0A481B9A6	HRG	0.214	0.326	0.918	FALSE	FALSE	FALSE	0
F1S3B8	FGFR4	0.215	0.472	0.943	FALSE	FALSE	FALSE	10
A0A8W4FP63	MAPRE1	0.216	0.313	0.915	FALSE	FALSE	FALSE	0
F1RVQ4	LRP5	0.216	0.592	0.956	FALSE	FALSE	FALSE	7
F1RPW2	F5	0.218	0.141	0.808	FALSE	FALSE	FALSE	0
F1RQ75	F9	0.218	0.201	0.866	FALSE	FALSE	FALSE	0
A0A287B2P9	THY1	0.219	0.506	0.948	FALSE	FALSE	FALSE	1
A1Y2K1	FYN	0.219	0.666	0.961	FALSE	FALSE	FALSE	14
F2Z5R6	CAND1	0.223	0.265	0.899	FALSE	FALSE	FALSE	0
P02067	HBB	0.223	0.604	0.957	FALSE	FALSE	FALSE	0
A0A287BIN3	CACNA2D1	0.224	0.4	0.933	FALSE	FALSE	FALSE	5
A0A287AWR7	PON1	0.225	0.3	0.911	FALSE	FALSE	FALSE	0
F1RQ08	PLCB3	0.225	0.521	0.949	FALSE	FALSE	FALSE	8
F1SIW5	B3GNT2	0.225	0.21	0.872	FALSE	FALSE	FALSE	0
K7GRK7	TNXB	0.225	0.296	0.91	FALSE	FALSE	FALSE	0
A0A287B380	TRAPPC3	0.226	0.727	0.964	FALSE	FALSE	FALSE	15
A0A8D1UC68	UGGT1	0.227	0.59	0.956	FALSE	FALSE	FALSE	5
A0A287B7K6	KRT78	0.228	0.865	0.97	FALSE	FALSE	FALSE	15
A0A4X1T8P8	SPOCK2	0.228	0.571	0.954	FALSE	FALSE	FALSE	5
A7MAK5	SFTPB	0.228	0.568	0.954	FALSE	FALSE	FALSE	2
A0A5G2RH74	CHRDL2	0.231	0.39	0.932	FALSE	FALSE	FALSE	1
F1S0L5	SDC2	0.231	0.533	0.951	FALSE	FALSE	FALSE	4
A0A5G2R2Y0	MFAP5	0.232	0.201	0.865	FALSE	FALSE	FALSE	0
A0A8D1SZ54	GET3	0.232	0.437	0.94	FALSE	FALSE	FALSE	3
K9J4M9	COLEC12	0.232	0.161	0.831	FALSE	FALSE	FALSE	0
F1SSF7	AEBP1	0.233	0.174	0.845	FALSE	FALSE	FALSE	0
F1SV58	MMP3	0.235	0.468	0.944	FALSE	FALSE	FALSE	0
A0A480VC90	ANP32B	0.236	0.593	0.956	FALSE	FALSE	FALSE	2
P61958	SUMO2	0.236	0.706	0.963	FALSE	FALSE	FALSE	15
A6ZIC9	IGFBP6	0.238	0.621	0.958	FALSE	FALSE	FALSE	10
P16611	IGFBP3	0.238	0.242	0.889	FALSE	FALSE	FALSE	0
A0A4X1TXM3	TIMD4	0.239	0.26	0.897	FALSE	FALSE	FALSE	0
A0A4X1VV61	CANX	0.239	0.417	0.937	FALSE	FALSE	FALSE	0
P14287	SPP1	0.24	0.302	0.911	FALSE	FALSE	FALSE	0
I3L755	A4GALT	0.241	0.625	0.958	FALSE	FALSE	FALSE	6
A0A286ZQ00	A0A286ZQ00	0.242	0.402	0.934	FALSE	FALSE	FALSE	5
A0A287ARC6	RAD23A	0.242	0.257	0.896	FALSE	FALSE	FALSE	0
A0A287B2C5	UBA2	0.242	0.254	0.893	FALSE	FALSE	FALSE	4
Q9GKE8	CD47	0.242	0.706	0.963	FALSE	FALSE	FALSE	12
K7GRE4	CD6	0.243	0.723	0.964	FALSE	FALSE	FALSE	13
A0A4X1UV00	PRKACB	0.245	0.739	0.965	FALSE	FALSE	FALSE	13
A0A287A546	RASA3	0.246	0.607	0.957	FALSE	FALSE	FALSE	13
A0A287AK42	PDCL3	0.246	0.72	0.964	FALSE	FALSE	FALSE	15
F1S4I1	GOLM1	0.246	0.139	0.806	FALSE	FALSE	FALSE	0
A0A287A3D8	CD34	0.247	0.296	0.91	FALSE	FALSE	FALSE	0
A0A5G2RKA4	COL11A1	0.247	0.313	0.915	FALSE	FALSE	FALSE	0
F1SJM0	PTX3	0.248	0.381	0.931	FALSE	FALSE	FALSE	0
P21692	MMP1	0.248	0.49	0.947	FALSE	FALSE	FALSE	2
A0A287ABP7	COPS3	0.249	0.389	0.932	FALSE	FALSE	FALSE	4
A0A287BBA6	ADGRE1	0.249	0.613	0.956	FALSE	FALSE	FALSE	15
A0A286ZIP1	GAPVD1	0.251	0.633	0.959	FALSE	FALSE	FALSE	7
F1SHJ6	CHST1	0.252	0.415	0.935	FALSE	FALSE	FALSE	8
C6K7I1	KPNA3	0.253	0.492	0.945	FALSE	FALSE	FALSE	12
I3LMU6	RCN3	0.253	0.148	0.817	FALSE	FALSE	FALSE	0
Q9MYY8	TXNRD1	0.253	0.822	0.968	FALSE	FALSE	FALSE	16
A0A8W4FD39	LOC100737483	0.254	0.862	0.97	FALSE	FALSE	FALSE	12
M3TYT0	ROCK2	0.254	0.727	0.964	FALSE	FALSE	FALSE	15
A0A5G2QFX9	MBL2	0.257	0.841	0.97	FALSE	FALSE	FALSE	5
F1SC80	RBP4	0.258	0.484	0.945	FALSE	FALSE	FALSE	11
A0A287B9V6	LOC100626147	0.26	0.404	0.935	FALSE	FALSE	FALSE	1
A0A286ZUY9	A1BG	0.263	0.209	0.871	FALSE	FALSE	FALSE	0
A0A8W4FDR1	COPS7A	0.263	0.716	0.963	FALSE	FALSE	FALSE	16
F1S3G6	OLFM2	0.263	0.29	0.908	FALSE	FALSE	FALSE	1
A0A5G2QSK4	GDI2	0.265	0.68	0.962	FALSE	FALSE	FALSE	12
A0A8D0PDF1	GLO1	0.265	0.756	0.966	FALSE	FALSE	FALSE	14
A0A8W4FIM2	ST8SIA5	0.265	0.478	0.945	FALSE	FALSE	FALSE	0
F1RJE3	VWA1	0.265	0.43	0.938	FALSE	FALSE	FALSE	4
F1SME8	MEGF9	0.265	0.247	0.891	FALSE	FALSE	FALSE	0
A0A4X1V7T1	LOC102166523	0.266	0.821	0.968	FALSE	FALSE	FALSE	16
F2Z5J1	PSMC1	0.268	0.358	0.926	FALSE	FALSE	FALSE	1
A0A4X1UIB2	FIS1	0.269	0.429	0.938	FALSE	FALSE	FALSE	4
A0A287B049	VGF	0.27	0.485	0.946	FALSE	FALSE	FALSE	1
A0A480WBM1	SBSPON	0.27	0.688	0.962	FALSE	FALSE	FALSE	16
F1SE30	ANK1	0.271	0.248	0.891	FALSE	FALSE	FALSE	1
K7GSI1	CD2	0.271	0.759	0.965	FALSE	FALSE	FALSE	17
P01965	HBA	0.271	0.543	0.952	FALSE	FALSE	FALSE	0
F1SN51	INPP1	0.272	0.697	0.963	FALSE	FALSE	FALSE	13
A0A287AHL4	TUBB2A	0.273	0.741	0.965	FALSE	FALSE	FALSE	16
F1RXM6	SERPINA7	0.274	0.181	0.85	FALSE	FALSE	FALSE	0
K7GLU6	ERAP1	0.275	0.464	0.943	FALSE	FALSE	FALSE	7
A0A287ARZ1	TXNDC5	0.276	0.298	0.91	FALSE	FALSE	FALSE	0
K7GN20	GP5	0.276	0.667	0.961	FALSE	FALSE	FALSE	10
A0A4X1TUN3	TAOK3	0.277	0.47	0.942	FALSE	FALSE	FALSE	13
P15145	ANPEP	0.277	0.513	0.949	FALSE	FALSE	FALSE	3
A0A287APR9	HNRNPUL2	0.278	0.349	0.924	FALSE	FALSE	FALSE	0
F1SN77	OSMR	0.28	0.335	0.919	FALSE	FALSE	FALSE	6
F1SUS0	MFAP2	0.281	0.259	0.896	FALSE	FALSE	FALSE	0
A0A5G2R599	FUCA2	0.283	0.341	0.921	FALSE	FALSE	FALSE	4
A0A287AIY6	CSPG5	0.284	0.266	0.899	FALSE	FALSE	FALSE	0
I3LC88	LRP1B	0.285	0.163	0.834	FALSE	FALSE	FALSE	0
A0A5G2QD80	DCTN2	0.286	0.569	0.953	FALSE	FALSE	FALSE	13
F1SRC8	CLEC3B	0.286	0.209	0.871	FALSE	FALSE	FALSE	0
A0A287ALN0	FLOT2	0.287	0.73	0.964	FALSE	FALSE	FALSE	15
F1SGI5	LOC100621351	0.287	0.544	0.952	FALSE	FALSE	FALSE	9
A0A287AKU3	CDH15	0.288	0.532	0.951	FALSE	FALSE	FALSE	6
A0A287BP22	FSTL1	0.288	0.0726	0.649	FALSE	FALSE	FALSE	0
A0A4X1SYQ3	A0A4X1SYQ3	0.288	0.168	0.839	FALSE	FALSE	FALSE	0
P22411	DPP4	0.288	0.517	0.949	FALSE	FALSE	FALSE	8
A0A8W4FKZ0	HMGB1	0.289	0.15	0.82	FALSE	FALSE	FALSE	0
A0A8W4FKJ8	NCAN	0.29	0.325	0.917	FALSE	FALSE	FALSE	3
O77696	ATP2A3	0.29	0.632	0.959	FALSE	FALSE	FALSE	11
A0A287A135	PCDH19	0.291	0.176	0.845	FALSE	FALSE	FALSE	1
A0A286ZHZ3	TSN	0.293	0.472	0.944	FALSE	FALSE	FALSE	6
F2Z5W6	LAMTOR1	0.294	0.767	0.966	FALSE	FALSE	FALSE	12
F1SUA0	FBLN7	0.295	0.277	0.9	FALSE	FALSE	FALSE	8
Q9TUQ3	C7	0.295	0.283	0.902	FALSE	FALSE	FALSE	9
F1SX62	VCAN	0.296	0.156	0.826	FALSE	FALSE	FALSE	0
F1RZZ1	TBCD	0.297	0.738	0.964	FALSE	FALSE	FALSE	17
P15468	RNASE4	0.298	0.184	0.851	FALSE	FALSE	FALSE	2
A0A8W4FF60	A0A8W4FF60	0.299	0.264	0.898	FALSE	FALSE	FALSE	2
A0A5G2R9S2	ESM1	0.3	0.497	0.947	FALSE	FALSE	FALSE	3
F1S4A9	SLC8A3	0.301	0.287	0.906	FALSE	FALSE	FALSE	4
A0A287AWY8	FAM177A1	0.302	0.389	0.929	FALSE	FALSE	FALSE	12
F1RXX3	IMP4	0.302	0.733	0.964	FALSE	FALSE	FALSE	17
F1SRK6	HSP90B1	0.304	0.64	0.959	FALSE	FALSE	FALSE	11
A0A4X1ST54	IPO7	0.306	0.587	0.956	FALSE	FALSE	FALSE	7
A0A287AT48	LOC100153899	0.308	0.307	0.913	FALSE	FALSE	FALSE	0
A0A5G2R9D7	MUC2	0.309	0.629	0.959	FALSE	FALSE	FALSE	3
A0A287B778	UBE2O	0.311	0.243	0.889	FALSE	FALSE	FALSE	0
I3LNK5	GSPT1	0.312	0.345	0.923	FALSE	FALSE	FALSE	1
F1SEC5	CGREF1	0.313	0.398	0.934	FALSE	FALSE	FALSE	1
I3LEZ3	LSAMP	0.313	0.147	0.814	FALSE	FALSE	FALSE	2
A0A5G2QNT7	NAPA	0.315	0.595	0.956	FALSE	FALSE	FALSE	10
Q2MJK3	NRAS	0.315	0.77	0.966	FALSE	FALSE	FALSE	16
A0A287A7Q7	EIF5	0.316	0.252	0.893	FALSE	FALSE	FALSE	1
A0A287B7S0	CD74	0.316	0.129	0.791	FALSE	FALSE	FALSE	0
P00339	LDHA	0.318	0.285	0.906	FALSE	FALSE	FALSE	0
F1SJW8	SERPING1	0.319	0.113	0.764	FALSE	FALSE	FALSE	0
A0A5G2RI34	HCLS1	0.321	0.129	0.791	FALSE	FALSE	FALSE	0
A0A286ZTA4	ALDOB	0.322	0.316	0.915	FALSE	FALSE	FALSE	3
A0A4X1SI63	PRXL2A	0.323	0.508	0.948	FALSE	FALSE	FALSE	11
A0A8D1I2F1	LGALS3	0.325	0.63	0.957	FALSE	FALSE	FALSE	16
I3LK71	HNRNPC	0.325	0.175	0.844	FALSE	FALSE	FALSE	1
Q29228	ALDH9A1	0.326	0.14	0.807	FALSE	FALSE	FALSE	0
A0A5G2QGW8	DKK3	0.327	0.0882	0.703	FALSE	FALSE	FALSE	0
A0A287BAZ6	PRDX2	0.329	0.326	0.918	FALSE	FALSE	FALSE	0
F1S1A6	B4GALT3	0.329	0.601	0.956	FALSE	FALSE	FALSE	15
Q2QLE3	TES	0.329	0.679	0.962	FALSE	FALSE	FALSE	11
P00336	LDHB	0.331	0.289	0.907	FALSE	FALSE	FALSE	0
A0A287ACP7	SF3A1	0.334	0.632	0.958	FALSE	FALSE	FALSE	13
A0A4X1W7V1	PSMC6	0.335	0.462	0.943	FALSE	FALSE	FALSE	4
A0A286ZRU9	SERPINH1	0.336	0.459	0.943	FALSE	FALSE	FALSE	4
K7GLT9	FYB1	0.336	0.626	0.958	FALSE	FALSE	FALSE	11
F1SBB3	LAMA3	0.337	0.361	0.925	FALSE	FALSE	FALSE	9
Q9XSZ6	FCER1G	0.337	0.537	0.951	FALSE	FALSE	FALSE	8
F1SL99	PTGES3	0.338	0.154	0.824	FALSE	FALSE	FALSE	0
Q8MJ14	GPX1	0.338	0.632	0.958	FALSE	FALSE	FALSE	13
A0A8W4F987	LOC110260307	0.34	0.648	0.959	FALSE	FALSE	FALSE	14
A0A287A7C6	BMP10	0.341	0.323	0.917	FALSE	FALSE	FALSE	2
Q99028	COMT	0.341	0.528	0.95	FALSE	FALSE	FALSE	11
A0A8D0USM9	CDH13	0.343	0.0772	0.667	FALSE	FALSE	FALSE	0
A0A287AGN1	APOBR	0.347	0.177	0.847	FALSE	FALSE	FALSE	0
Q8MJ39	MGP	0.348	0.0768	0.665	FALSE	FALSE	FALSE	0
F1S8R6	C4orf48	0.35	0.558	0.953	FALSE	FALSE	FALSE	4
A0A287A8P0	OS9	0.352	0.0885	0.704	FALSE	FALSE	FALSE	0
F1S708	TNN	0.352	0.507	0.948	FALSE	FALSE	FALSE	11
A0A5G2R3H6	EIF3J	0.353	0.244	0.89	FALSE	FALSE	FALSE	0
K7GSZ6	HEPH	0.354	0.509	0.947	FALSE	FALSE	FALSE	13
F1S692	IFNGR1	0.355	0.472	0.942	FALSE	FALSE	FALSE	14
A0A5G2QLE8	TTLL12	0.356	0.181	0.851	FALSE	FALSE	FALSE	0
A0A8D0U0L0	COPS8	0.356	0.512	0.949	FALSE	FALSE	FALSE	7
A0A287AWV5	LAMB2	0.357	0.42	0.937	FALSE	FALSE	FALSE	6
A0A8W4FGH2	CLNS1A	0.359	0.267	0.9	FALSE	FALSE	FALSE	0
F1SMU0	CCBE1	0.36	0.447	0.938	FALSE	FALSE	FALSE	14
A0A286ZFW3	APOH	0.361	0.19	0.858	FALSE	FALSE	FALSE	0
Q28990	OVGP1	0.361	0.345	0.923	FALSE	FALSE	FALSE	3
F1RPA7	GP2	0.362	0.0971	0.727	FALSE	FALSE	FALSE	0
A0A287A3W3	PYCR3	0.363	0.513	0.948	FALSE	FALSE	FALSE	13
A0A1S6M251	B4GALT5	0.365	0.343	0.922	FALSE	FALSE	FALSE	5
A0A5G2RIC0	IPO5	0.366	0.172	0.843	FALSE	FALSE	FALSE	0
A0A287AT83	EIF4B	0.367	0.514	0.948	FALSE	FALSE	FALSE	13
A0A287BKG2	CHI3L1	0.369	0.463	0.942	FALSE	FALSE	FALSE	12
Q29577	CKMT1	0.369	0.555	0.953	FALSE	FALSE	FALSE	4
A0A0H5ANC0	OGN	0.371	0.0326	0.403	FALSE	FALSE	FALSE	0
F1RG60	SEPTIN1	0.371	0.467	0.942	FALSE	FALSE	FALSE	12
A0A287BLH9	A0A287BLH9	0.375	0.631	0.959	FALSE	FALSE	FALSE	2
A0A287B883	PTMS	0.378	0.22	0.877	FALSE	FALSE	FALSE	0
F1SUQ5	UBR4	0.379	0.308	0.912	FALSE	FALSE	FALSE	6
A0A287BAX1	RASGRP2	0.38	0.42	0.937	FALSE	FALSE	FALSE	6
F1S3G7	COL5A3	0.384	0.233	0.884	FALSE	FALSE	FALSE	0
I3LM94	SMOC1	0.384	0.273	0.901	FALSE	FALSE	FALSE	1
P81405	PSAP	0.384	0.537	0.951	FALSE	FALSE	FALSE	4
A0A4X1V7C1	ABRAXAS2	0.385	0.357	0.923	FALSE	FALSE	FALSE	11
I3LK91	LRRC34	0.387	0.625	0.958	FALSE	FALSE	FALSE	14
I3LQH7	BLVRB	0.387	0.203	0.867	FALSE	FALSE	FALSE	0
F1SCD0	LOC396685	0.388	0.217	0.876	FALSE	FALSE	FALSE	0
I3LAC9	CPHL1	0.388	0.707	0.963	FALSE	FALSE	FALSE	12
C3S7K5	S100A8	0.389	0.301	0.906	FALSE	FALSE	FALSE	11
F1SAY0	PTGFRN	0.389	0.448	0.939	FALSE	FALSE	FALSE	13
A0A5G2QE80	L1CAM	0.39	0.49	0.946	FALSE	FALSE	FALSE	3
F1RMW7	CD177	0.393	0.659	0.959	FALSE	FALSE	FALSE	17
A0A286ZWU9	MLEC	0.395	0.703	0.963	FALSE	FALSE	FALSE	15
A0A5G2QWB1	WDR44	0.395	0.421	0.933	FALSE	FALSE	FALSE	15
A0A8D1HQ01	TSPAN14	0.396	0.638	0.959	FALSE	FALSE	FALSE	14
I3L7I6	EXTL1	0.396	0.49	0.946	FALSE	FALSE	FALSE	8
O18831	MSTN	0.398	0.495	0.946	FALSE	FALSE	FALSE	11
A0A286ZVI5	PPP6R3	0.399	0.284	0.905	FALSE	FALSE	FALSE	1
Q06AU2	RAP2A	0.401	0.405	0.932	FALSE	FALSE	FALSE	12
Q5XLD2	MYL11	0.401	0.616	0.958	FALSE	FALSE	FALSE	8
F1S3J7	PAPLN	0.403	0.252	0.891	FALSE	FALSE	FALSE	5
I3LAJ6	RALA	0.403	0.188	0.848	FALSE	FALSE	FALSE	8
K7GL05	SLC44A1	0.403	0.682	0.962	FALSE	FALSE	FALSE	12
I3LVL5	CRISP3	0.404	0.616	0.957	FALSE	FALSE	FALSE	12
F1SIN0	GCNT1	0.405	0.65	0.958	FALSE	FALSE	FALSE	17
F6Q194	FGL2	0.411	0.632	0.958	FALSE	FALSE	FALSE	13
A0A5G2QK35	HTRA1	0.413	0.218	0.875	FALSE	FALSE	FALSE	3
P00571	AK1	0.416	0.641	0.958	FALSE	FALSE	FALSE	17
P08835	ALB	0.416	0.0176	0.294	FALSE	FALSE	FALSE	0
A0A8W4F9M4	ALB	0.418	0.19	0.858	FALSE	FALSE	FALSE	0
A0A287AT21	SORD	0.419	0.461	0.942	FALSE	FALSE	FALSE	11
A0A4X1U4W6	EIF3D	0.419	0.539	0.951	FALSE	FALSE	FALSE	12
A0A4X1SZT7	ARIH2	0.423	0.396	0.933	FALSE	FALSE	FALSE	5
A5GFW5	CASS4	0.426	0.568	0.953	FALSE	FALSE	FALSE	15
A0A5K1UAD0	SERPINE2	0.428	0.417	0.935	FALSE	FALSE	FALSE	11
Q9GLP1	F5	0.428	0.372	0.926	FALSE	FALSE	FALSE	11
A0A287AB80	UBE2H	0.431	0.628	0.958	FALSE	FALSE	FALSE	10
F1RNX2	PDCD5	0.431	0.573	0.954	FALSE	FALSE	FALSE	13
A0A8W4FNH8	OGFR	0.434	0.171	0.838	FALSE	FALSE	FALSE	4
F1S2X3	ECHDC1	0.436	0.282	0.904	FALSE	FALSE	FALSE	4
A0A5G2QXD3	LOC100515166	0.438	0.53	0.949	FALSE	FALSE	FALSE	14
P79293	MYH7	0.438	0.574	0.953	FALSE	FALSE	FALSE	14
F1RFZ5	GNPTG	0.44	0.211	0.869	FALSE	FALSE	FALSE	4
F1SQ89	CAND2	0.44	0.0511	0.54	FALSE	FALSE	FALSE	0
Q8MJ49	OSTF1	0.441	0.238	0.884	FALSE	FALSE	FALSE	6
A0A287ADQ5	BPIFB3	0.444	0.28	0.903	FALSE	FALSE	FALSE	5
A0A8D1Z1H8	TGM2	0.447	0.172	0.84	FALSE	FALSE	FALSE	3
A0A8W4FEH7	DARS1	0.447	0.417	0.933	FALSE	FALSE	FALSE	14
A7YX24	SNCG	0.447	0.233	0.885	FALSE	FALSE	FALSE	0
F1RHU3	TBC1D17	0.451	0.551	0.952	FALSE	FALSE	FALSE	11
A0A286ZNW2	B3GNT9	0.452	0.146	0.81	FALSE	FALSE	FALSE	4
I3LCQ4	UMODL1	0.454	0.616	0.956	FALSE	FALSE	FALSE	16
Q28943	DPYD	0.454	0.636	0.959	FALSE	FALSE	FALSE	12
A0A287ADE7	A0A287ADE7	0.455	0.177	0.846	FALSE	FALSE	FALSE	1
K7GMU1	CD86	0.457	0.209	0.859	FALSE	FALSE	FALSE	11
K7GT68	ITGA6	0.461	0.455	0.941	FALSE	FALSE	FALSE	11
I3L9J4	CCT6A	0.462	0.426	0.938	FALSE	FALSE	FALSE	6
Q2XQV4	ALDH2	0.462	0.661	0.96	FALSE	FALSE	FALSE	14
A0A287AAK1	GPS1	0.467	0.225	0.88	FALSE	FALSE	FALSE	1
A0A8W4FAC0	CSK	0.467	0.227	0.877	FALSE	FALSE	FALSE	7
F1SLW1	CLSTN3	0.467	0.254	0.887	FALSE	FALSE	FALSE	11
A0A287A4Q7	ACTN4	0.47	0.402	0.932	FALSE	FALSE	FALSE	11
I3L9H4	PITHD1	0.474	0.417	0.932	FALSE	FALSE	FALSE	15
Q06AT1	HPCA	0.474	0.456	0.94	FALSE	FALSE	FALSE	14
A0A287AE06	LMNA	0.475	0.622	0.958	FALSE	FALSE	FALSE	11
K7GLT8	ATP5F1B	0.476	0.482	0.945	FALSE	FALSE	FALSE	8
A0A287BLE1	SQSTM1	0.48	0.564	0.952	FALSE	FALSE	FALSE	15
F1SQ08	KERA	0.482	0.149	0.814	FALSE	FALSE	FALSE	4
Q9BEC7	NPL	0.482	0.644	0.959	FALSE	FALSE	FALSE	15
A0A8D0QQ23	CALU	0.489	0.107	0.751	FALSE	FALSE	FALSE	0
A0A8W4FQG7	FNBP1	0.491	0.416	0.933	FALSE	FALSE	FALSE	14
F1RW71	MMRN1	0.493	0.417	0.935	FALSE	FALSE	FALSE	11
A0A4X1V3K1	SNAP23	0.495	0.506	0.945	FALSE	FALSE	FALSE	16
A0A287A703	ADH1C	0.498	0.42	0.937	FALSE	FALSE	FALSE	1
A0A8W4FBJ5	A0A8W4FBJ5	0.501	0.0701	0.618	FALSE	FALSE	FALSE	5
A0A286ZIV7	LOC102158372	0.504	0.23	0.882	FALSE	FALSE	FALSE	1
A0A287A1S6	COL1A1	0.505	0.271	0.901	FALSE	FALSE	FALSE	0
K7GNF5	SDC1	0.508	0.0329	0.405	FALSE	FALSE	FALSE	0
A0A287B5W2	LOC100302368	0.513	0.277	0.903	FALSE	FALSE	FALSE	0
A0A4X1VCL1	PSMC2	0.518	0.0865	0.695	FALSE	FALSE	FALSE	1
A0A287ASU4	RPS2	0.519	0.714	0.963	FALSE	FALSE	FALSE	14
A0A286ZR45	ADD1	0.521	0.215	0.865	FALSE	FALSE	FALSE	10
A0A287A481	PLG	0.522	0.0714	0.618	FALSE	FALSE	FALSE	6
F1SJ07	PLEK	0.523	0.123	0.763	FALSE	FALSE	FALSE	8
A0A8D1Y1K2	LOC100621820	0.531	0.317	0.915	FALSE	FALSE	FALSE	4
F1RLT2	XYLT1	0.534	0.0446	0.487	FALSE	FALSE	FALSE	2
A0A287BRY9	MDK	0.536	0.552	0.952	FALSE	FALSE	FALSE	12
F1RWJ5	KPNB1	0.538	0.0923	0.715	FALSE	FALSE	FALSE	0
I3LCF8	CTRL	0.538	0.255	0.894	FALSE	FALSE	FALSE	0
A0A286ZKW5	GPD2	0.542	0.633	0.958	FALSE	FALSE	FALSE	16
A0A287AQD6	MEGF10	0.542	0.136	0.802	FALSE	FALSE	FALSE	0
D0G777	MAT2A	0.542	0.641	0.959	FALSE	FALSE	FALSE	15
A0A8W4FMZ5	USP15	0.549	0.0491	0.518	FALSE	FALSE	FALSE	2
P0DSO0	SAA2	0.549	0.482	0.945	FALSE	FALSE	FALSE	7
A0A5G2QHK1	RSC1A1	0.556	0.115	0.758	FALSE	FALSE	FALSE	5
A0A4X1W953	SMYD5	0.565	0.259	0.894	FALSE	FALSE	FALSE	6
F1RG63	DCTPP1	0.565	0.36	0.92	FALSE	FALSE	FALSE	14
A0A480ZBJ4	NDRG2	0.574	0.103	0.71	FALSE	FALSE	FALSE	9
A0A8W4FLG3	SERPINA3-2	0.576	0.0256	0.342	FALSE	FALSE	FALSE	0
A0A287ALA0	BASP1	0.581	0.296	0.905	FALSE	FALSE	FALSE	11
F1RIA2	CD5	0.584	0.337	0.912	FALSE	FALSE	FALSE	15
I3LCA2	CCT8	0.584	0.128	0.776	FALSE	FALSE	FALSE	7
F1SFV7	S100A4	0.589	0.397	0.931	FALSE	FALSE	FALSE	11
A0A287AW36	MGAT3	0.59	0.485	0.944	FALSE	FALSE	FALSE	14
F1SC51	PDLIM1	0.591	0.33	0.909	FALSE	FALSE	FALSE	15
A0A287AU22	PLVAP	0.595	0.211	0.866	FALSE	FALSE	FALSE	8
K9IVV5	WARS1	0.596	0.0838	0.689	FALSE	FALSE	FALSE	0
I3LIN5	USP14	0.604	0.218	0.867	FALSE	FALSE	FALSE	10
A0A287B749	TUBB6	0.609	0.346	0.915	FALSE	FALSE	FALSE	15
A0A287A1V6	SGTA	0.61	0.0212	0.32	FALSE	FALSE	FALSE	0
I3L5S6	CD163L1	0.62	0.482	0.943	FALSE	FALSE	FALSE	15
A0A5G2QDP6	CD38	0.624	0.0639	0.581	FALSE	FALSE	FALSE	6
F2Z5S6	BRK1	0.63	0.382	0.922	FALSE	FALSE	FALSE	16
Q9TSX9	PRDX6	0.63	0.389	0.932	FALSE	FALSE	FALSE	4
F2Z5N6	PPP6C	0.633	0.0198	0.308	FALSE	FALSE	FALSE	1
A0A8W4FFH5	LAMA5	0.634	0.448	0.936	FALSE	FALSE	FALSE	16
A0A075B7I9	A0A075B7I9	0.638	0.185	0.853	FALSE	FALSE	FALSE	1
A0A5G2R0E8	MAN2B1	0.639	0.577	0.954	FALSE	FALSE	FALSE	11
F1STI9	ENDOD1	0.64	0.306	0.904	FALSE	FALSE	FALSE	14
A0A4X1VMY1	SNRPD1	0.641	0.262	0.879	FALSE	FALSE	FALSE	15
A0A287A7G4	LOC110258087	0.646	0.0657	0.59	FALSE	FALSE	FALSE	6
A0A4X1UDZ5	TMOD1	0.647	0.296	0.905	FALSE	FALSE	FALSE	11
K7GPR7	SRC	0.649	0.302	0.899	FALSE	FALSE	FALSE	15
A0A286ZI97	PGLYRP1	0.65	0.467	0.941	FALSE	FALSE	FALSE	15
A0A286ZV95	TMED10	0.662	0.471	0.938	FALSE	FALSE	FALSE	17
A0A286ZKZ0	LOC100523123	0.665	0.187	0.845	FALSE	FALSE	FALSE	9
F1RUM4	ITIH2	0.668	0.0409	0.42	FALSE	FALSE	FALSE	7
F1RG17	NME3	0.672	0.0618	0.597	FALSE	FALSE	FALSE	1
F1RZM4	LAMA4	0.673	0.174	0.826	FALSE	FALSE	FALSE	11
A0A286ZYZ5	LOC106504547	0.674	0.211	0.872	FALSE	FALSE	FALSE	0
F1SQT3	SLC25A3	0.675	0.479	0.943	FALSE	FALSE	FALSE	14
A0A287ACW6	USP9X	0.691	0.269	0.894	FALSE	FALSE	FALSE	11
A0A8D1TT21	ANP32A	0.706	0.0192	0.295	FALSE	FALSE	FALSE	3
I3LUP6	NPM1	0.706	0.499	0.947	FALSE	FALSE	FALSE	8
A0A8D0P6A0	ELOC	0.712	0.0626	0.512	FALSE	FALSE	FALSE	11
O77666	TRIM26	0.718	0.438	0.932	FALSE	FALSE	FALSE	17
Q6Q2C2	EPHX2	0.722	0.341	0.915	FALSE	FALSE	FALSE	14
A0A8D1TCS0	TINAGL1	0.723	0.195	0.856	FALSE	FALSE	FALSE	7
A0A286ZV97	GIMAP4	0.726	0.299	0.893	FALSE	FALSE	FALSE	16
Q29293	RPL3	0.73	0.759	0.966	FALSE	FALSE	FALSE	16
F1SMG8	HMGCS1	0.731	0.245	0.874	FALSE	FALSE	FALSE	14
P08059	GPI	0.734	0.428	0.93	FALSE	FALSE	FALSE	17
F1STM4	LOC100514912	0.742	0.152	0.807	FALSE	FALSE	FALSE	9
Q6R2V0	WNK1	0.75	0.308	0.901	FALSE	FALSE	FALSE	15
A0A287A1G4	PDLIM5	0.756	0.142	0.776	FALSE	FALSE	FALSE	12
Q95242	PECAM1	0.757	0.351	0.916	FALSE	FALSE	FALSE	15
I3LCU1	GINM1	0.769	0.312	0.903	FALSE	FALSE	FALSE	15
A0A4X1VPT2	ELANE	0.77	0.156	0.79	FALSE	FALSE	FALSE	13
F1SV94	LCK	0.79	0.372	0.923	FALSE	FALSE	FALSE	14
A0A8W4FQ33	IQGAP2	0.803	0.463	0.941	FALSE	FALSE	FALSE	14
I3L5Y3	LY75	0.807	0.229	0.863	FALSE	FALSE	FALSE	14
A0A287B2T2	PTPRJ	0.808	0.0103	0.191	FALSE	FALSE	FALSE	3
A0A5G2R0L8	ESYT1	0.808	0.225	0.87	FALSE	FALSE	FALSE	11
P30930	LCAT	0.814	0.234	0.879	FALSE	FALSE	FALSE	9
Q4LE85	RAB27A	0.819	0.435	0.938	FALSE	FALSE	FALSE	11
F1SMZ4	DNER	0.831	0.11	0.729	FALSE	FALSE	FALSE	9
A1IU54	CPE	0.838	0.0529	0.523	FALSE	FALSE	FALSE	5
F1SH98	GLT8D1	0.846	0.584	0.954	FALSE	FALSE	FALSE	16
A0A8W4FHY5	A0A8W4FHY5	0.848	0.474	0.944	FALSE	FALSE	FALSE	6
A0A288CG47	PSMD4	0.85	0.115	0.736	FALSE	FALSE	FALSE	10
B2ZI35	F11R	0.88	0.534	0.949	FALSE	FALSE	FALSE	15
A0A4X1USQ6	UBE2R2	0.887	0.0439	0.461	FALSE	FALSE	FALSE	5
A0A480KBE3	SKAP2	0.895	0.117	0.708	FALSE	FALSE	FALSE	13
A0A287AKU6	PDCD6	0.901	0.432	0.933	FALSE	FALSE	FALSE	16
Q29554	HADHA	0.901	0.225	0.841	FALSE	FALSE	FALSE	16
A0A287AVP0	BIN1	0.902	0.179	0.828	FALSE	FALSE	FALSE	12
F1SBT1	TNFSF9	0.904	0.0879	0.603	FALSE	FALSE	FALSE	13
A0A4X1WBE0	XPO1	0.907	0.307	0.907	FALSE	FALSE	FALSE	12
F1RVH7	IGFBP7	0.917	0.157	0.806	FALSE	FALSE	FALSE	11
P37111	ACY1	0.924	0.0674	0.49	FALSE	FALSE	FALSE	13
I3LI73	FBN3	0.93	0.203	0.816	FALSE	FALSE	FALSE	16
A0A5G2QW16	SNX9	0.931	0.33	0.899	FALSE	FALSE	FALSE	17
I3LPF1	ACBD3	0.939	0.111	0.669	FALSE	FALSE	FALSE	14
A0A480MPL1	PACSIN2	0.951	0.0665	0.536	FALSE	FALSE	FALSE	11
A0A4X1SL39	PDZK1	0.968	0.152	0.799	FALSE	FALSE	FALSE	11
A0A4X1TP96	EIF4G2	0.968	0.44	0.936	FALSE	FALSE	FALSE	15
Q7M2W6	CRYAB	0.995	0.275	0.879	FALSE	FALSE	FALSE	16
K7GNP5	SFRP1	1	0.16	0.809	FALSE	FALSE	FALSE	11
F1RM03	SAE1	1.01	0.224	0.84	FALSE	FALSE	FALSE	16
A0A287A682	CLTA	1.02	0.293	0.88	FALSE	FALSE	FALSE	17
I3LUE7	C5AR1	1.02	0.042	0.343	FALSE	FALSE	FALSE	12
F1S3D5	LMAN2	1.03	0.157	0.781	FALSE	FALSE	FALSE	14
F1S9A4	NUCB2	1.03	0.165	0.755	FALSE	FALSE	FALSE	16
Q863I2	OXSR1	1.03	0.17	0.765	FALSE	FALSE	FALSE	16
A0A480J3B5	LAT	1.05	0.283	0.873	FALSE	FALSE	FALSE	17
A5D9M6	BAG6	1.06	0.132	0.765	FALSE	FALSE	FALSE	11
A0A287AP07	PTPRK	1.08	0.0546	0.364	FALSE	FALSE	FALSE	14
F1SMW8	SERPINB10	1.08	0.115	0.652	FALSE	FALSE	FALSE	15
A0A8W4FNE8	A0A8W4FNE8	1.1	0.317	0.915	FALSE	FALSE	FALSE	3
A0A8D0STA6	A0A8D0STA6	1.14	0.357	0.92	FALSE	FALSE	FALSE	14
A0A8W4FAI7	FNDC1	1.15	0.254	0.883	FALSE	FALSE	FALSE	13
I3LC07	RAB18	1.15	0.125	0.685	FALSE	FALSE	FALSE	15
Q8MI69	WFDC2	1.16	0.108	0.625	FALSE	FALSE	FALSE	15
A0A286ZLK9	IMPG2	1.17	0.0212	0.204	FALSE	FALSE	FALSE	12
A0A287AKZ5	EIF1AX	1.18	0.169	0.824	FALSE	FALSE	FALSE	10
A0A1L6ZA08	LY6G6F	1.19	0.153	0.775	FALSE	FALSE	FALSE	14
A0A481ASF4	BLK	1.2	0.154	0.729	FALSE	FALSE	FALSE	16
F1SV69	MMP8	1.24	0.219	0.811	FALSE	FALSE	FALSE	17
A0A287B475	PDE5A	1.26	0.105	0.67	FALSE	FALSE	FALSE	13
A0A4X1VC39	KPNA4	1.31	0.208	0.837	FALSE	FALSE	FALSE	15
A0A287B9W3	DYNC1H1	1.32	0.0786	0.614	FALSE	FALSE	FALSE	10
O19069	SUCLG1	1.32	0.195	0.773	FALSE	FALSE	FALSE	17
A0A287BB49	HHIP	1.33	0.12	0.62	FALSE	FALSE	FALSE	16
K7GQ54	IL16	1.33	0.101	0.528	FALSE	FALSE	FALSE	16
A0A286ZIJ6	INHBC	1.36	0.361	0.916	FALSE	FALSE	FALSE	16
A0A287BDI2	LOC100154047	1.37	0.184	0.749	FALSE	FALSE	FALSE	17
A0A481AAI5	JAML	1.37	0.0915	0.473	FALSE	FALSE	FALSE	16
F1S2V7	PPP2R5A	1.37	0.0466	0.291	FALSE	FALSE	FALSE	15
A0A4X1SDE2	PRUNE1	1.41	0.175	0.73	FALSE	FALSE	FALSE	17
I3L7I0	P3H1	1.41	0.0656	0.439	FALSE	FALSE	FALSE	14
F1RT27	OSTM1	1.42	0.0104	0.0528	FALSE	FALSE	FALSE	13
P80310	S100A12	1.46	0.17	0.788	FALSE	FALSE	FALSE	15
A0A5G2QZG3	LOC100525572	1.5	0.196	0.851	FALSE	FALSE	FALSE	10
A0A287A9M0	MYLK	1.51	0.0593	0.467	FALSE	FALSE	FALSE	12
A0A480LAY6	CTSA	1.53	0.201	0.849	FALSE	FALSE	FALSE	12
I7GF95	GNL1	1.56	0.0154	0.104	FALSE	FALSE	FALSE	13
P33198	IDH2	1.56	0.109	0.684	FALSE	FALSE	FALSE	13
A0A5G2QWW7	KIRREL2	1.62	0.13	0.659	FALSE	FALSE	FALSE	16
Q95266	CAMK2D	1.62	0.0264	0.277	FALSE	FALSE	FALSE	11
A0A287APB2	EPN2	1.68	0.0541	0.273	FALSE	FALSE	FALSE	16
P03970	INHBA	1.69	0.132	0.756	FALSE	FALSE	FALSE	12
A0A8W4FPQ3	A0A8W4FPQ3	1.74	0.067	0.331	FALSE	FALSE	FALSE	16
A0A287AW67	LGMN	1.77	0.11	0.63	FALSE	FALSE	FALSE	15
F1SGS6	CAPRIN1	1.82	0.0253	0.114	FALSE	FALSE	FALSE	15
Q29042	FCN1	1.84	0.14	0.803	FALSE	FALSE	FALSE	3
I3L9F8	VTN	1.89	0.31	0.913	FALSE	FALSE	FALSE	3
A0A286ZMV3	UBAC1	1.96	0.0921	0.548	FALSE	FALSE	FALSE	15
A0A4X1SFB6	FHL1	1.96	0.0294	0.253	FALSE	FALSE	FALSE	13
P04088	INHBB	2.07	0.0784	0.305	FALSE	FALSE	FALSE	17
F2Z5L2	H2AC18	2.08	0.0351	0.361	FALSE	FALSE	FALSE	8
A0A287AGJ7	CPSF6	2.09	0.0766	0.297	FALSE	FALSE	FALSE	17
A0A286ZZU1	TP53BP1	2.12	0.195	0.806	FALSE	FALSE	FALSE	16
A0A4X1VEC8	FLNB	2.18	0.103	0.601	FALSE	FALSE	FALSE	15
F6QAP1	CTNNB1	2.24	0.0388	0.343	FALSE	FALSE	FALSE	11
A0A287ALJ6	A0A287ALJ6	2.28	0.146	0.762	FALSE	FALSE	FALSE	14
I3LRS5	ALDH1A1	2.55	0.0473	0.107	FALSE	FALSE	FALSE	17
A0A4X1SJ12	NOP56	2.76	0.201	0.814	FALSE	FALSE	FALSE	16
Q865F1	MTTP	3.95	0.0142	0.000666	TRUE	TRUE	FALSE	17
A0A286ZI77	PICALM	NA	NA	NA	NA	NA	FALSE	18
A0A286ZJF6	GPNMB	NA	NA	NA	NA	NA	FALSE	17
A0A286ZJI6	KIF2A	NA	NA	NA	NA	NA	FALSE	15
A0A286ZJM4	MCM7	NA	NA	NA	NA	NA	FALSE	16
A0A286ZL51	RPL23A	NA	NA	NA	NA	NA	FALSE	18
A0A286ZL65	RPL15	NA	NA	NA	NA	NA	FALSE	17
A0A286ZNQ7	PRKAR2B	NA	NA	NA	NA	NA	FALSE	18
A0A286ZQW5	SURF4	NA	NA	NA	NA	NA	FALSE	18
A0A286ZS27	RAB5B	NA	NA	NA	NA	NA	FALSE	17
A0A286ZSN6	LOC100622780	NA	NA	NA	NA	NA	FALSE	18
A0A286ZT30	RAP1GAP2	NA	NA	NA	NA	NA	FALSE	17
A0A286ZT61	A0A286ZT61	NA	NA	NA	NA	NA	FALSE	15
A0A286ZTH5	RAB27B	NA	NA	NA	NA	NA	FALSE	17
A0A286ZUZ1	SNX2	NA	NA	NA	NA	NA	FALSE	19
A0A286ZWJ3	MATR3	NA	NA	NA	NA	NA	FALSE	16
A0A286ZX29	SERPINB12	NA	NA	NA	NA	NA	FALSE	18
A0A286ZXF5	WDR37	NA	NA	NA	NA	NA	FALSE	18
A0A286ZXS0	SPTAN1	NA	NA	NA	NA	NA	FALSE	17
A0A286ZYB5	DUT	NA	NA	NA	NA	NA	FALSE	18
A0A286ZYE7	HNRNPDL	NA	NA	NA	NA	NA	FALSE	18
A0A286ZYU8	ALDH1L1	NA	NA	NA	NA	NA	FALSE	18
A0A286ZZM7	TXNDC17	NA	NA	NA	NA	NA	FALSE	18
A0A287A0K2	MRPL49	NA	NA	NA	NA	NA	FALSE	18
A0A287A3T1	TOLLIP	NA	NA	NA	NA	NA	FALSE	17
A0A287A4F2	SFPQ	NA	NA	NA	NA	NA	FALSE	18
A0A287A4H2	PURB	NA	NA	NA	NA	NA	FALSE	18
A0A287A4Q2	A0A287A4Q2	NA	NA	NA	NA	NA	FALSE	18
A0A287A8J7	RRM1	NA	NA	NA	NA	NA	FALSE	18
A0A287A9H4	HNRNPH2	NA	NA	NA	NA	NA	FALSE	16
A0A287A9Y6	RPS7	NA	NA	NA	NA	NA	FALSE	17
A0A287AAA2	NRDC	NA	NA	NA	NA	NA	FALSE	18
A0A287AAR5	NDUFAB1	NA	NA	NA	NA	NA	FALSE	18
A0A287ACS0	LUC7L3	NA	NA	NA	NA	NA	FALSE	18
A0A287ADD9	TBC1D15	NA	NA	NA	NA	NA	FALSE	17
A0A287ADP9	ANKRD28	NA	NA	NA	NA	NA	FALSE	18
A0A287AE36	RPL38	NA	NA	NA	NA	NA	FALSE	18
A0A287AEA5	ALDH16A1	NA	NA	NA	NA	NA	FALSE	19
A0A287AF06	IRAK2	NA	NA	NA	NA	NA	FALSE	18
A0A287AG39	SNRPB	NA	NA	NA	NA	NA	FALSE	17
A0A287AG48	KRT7	NA	NA	NA	NA	NA	FALSE	17
A0A287AGI3	U2AF1	NA	NA	NA	NA	NA	FALSE	19
A0A287AGM8	DDOST	NA	NA	NA	NA	NA	FALSE	18
A0A287AHQ0	ACAT2	NA	NA	NA	NA	NA	FALSE	16
A0A287AHW6	DDX5	NA	NA	NA	NA	NA	FALSE	17
A0A287AJ85	SNRNP70	NA	NA	NA	NA	NA	FALSE	17
A0A287AJQ1	IGF2BP3	NA	NA	NA	NA	NA	FALSE	18
A0A287AJS8	SLA-2	NA	NA	NA	NA	NA	FALSE	17
A0A287AJX7	HNRNPL	NA	NA	NA	NA	NA	FALSE	18
A0A287AK75	CIRBP	NA	NA	NA	NA	NA	FALSE	18
A0A287AKB2	YOD1	NA	NA	NA	NA	NA	FALSE	19
A0A287AKS6	SCG3	NA	NA	NA	NA	NA	FALSE	18
A0A287AKZ8	IPO9	NA	NA	NA	NA	NA	FALSE	19
A0A287AL76	ARCN1	NA	NA	NA	NA	NA	FALSE	17
A0A287AP21	PPIF	NA	NA	NA	NA	NA	FALSE	17
A0A287APC7	ATP2B4	NA	NA	NA	NA	NA	FALSE	16
A0A287APG0	SLK	NA	NA	NA	NA	NA	FALSE	18
A0A287ARG2	A0A287ARG2	NA	NA	NA	NA	NA	FALSE	19
A0A287ASA9	PLEKHF2	NA	NA	NA	NA	NA	FALSE	18
A0A287ASR3	PABPN1	NA	NA	NA	NA	NA	FALSE	19
A0A287ASV0	ADGRA3	NA	NA	NA	NA	NA	FALSE	18
A0A287AU93	A0A287AU93	NA	NA	NA	NA	NA	FALSE	18
A0A287AV35	SF3B1	NA	NA	NA	NA	NA	FALSE	18
A0A287AXP9	COLGALT1	NA	NA	NA	NA	NA	FALSE	18
A0A287AZF9	CYC1	NA	NA	NA	NA	NA	FALSE	19
A0A287B2G4	GCN1	NA	NA	NA	NA	NA	FALSE	18
A0A287B2H1	ABHD14A	NA	NA	NA	NA	NA	FALSE	15
A0A287B3D7	MACROH2A1	NA	NA	NA	NA	NA	FALSE	17
A0A287B5A2	ATP1B3	NA	NA	NA	NA	NA	FALSE	17
A0A287B8J2	DCTN1	NA	NA	NA	NA	NA	FALSE	15
A0A287B8W9	PRKCD	NA	NA	NA	NA	NA	FALSE	19
A0A287BAQ0	RBM39	NA	NA	NA	NA	NA	FALSE	18
A0A287BBK0	DDAH1	NA	NA	NA	NA	NA	FALSE	19
A0A287BBS8	IDE	NA	NA	NA	NA	NA	FALSE	18
A0A287BBU5	SCUBE1	NA	NA	NA	NA	NA	FALSE	18
A0A287BD45	TMED8	NA	NA	NA	NA	NA	FALSE	18
A0A287BDN2	SPTBN1	NA	NA	NA	NA	NA	FALSE	17
A0A287BF30	AARSD1	NA	NA	NA	NA	NA	FALSE	19
A0A287BGW4	ALAD	NA	NA	NA	NA	NA	FALSE	18
A0A287BHE7	RPS14	NA	NA	NA	NA	NA	FALSE	17
A0A287BK25	NONO	NA	NA	NA	NA	NA	FALSE	18
A0A287BK74	EIF3L	NA	NA	NA	NA	NA	FALSE	18
A0A287BKR2	SHMT2	NA	NA	NA	NA	NA	FALSE	19
A0A287BL45	PLCH1	NA	NA	NA	NA	NA	FALSE	18
A0A287BL93	HNRNPM	NA	NA	NA	NA	NA	FALSE	18
A0A287BLB3	KHSRP	NA	NA	NA	NA	NA	FALSE	17
A0A287BMK8	IMPDH2	NA	NA	NA	NA	NA	FALSE	18
A0A287BMW9	DNM1L	NA	NA	NA	NA	NA	FALSE	17
A0A287BN69	DDX39A	NA	NA	NA	NA	NA	FALSE	18
A0A287BNE4	UBE2M	NA	NA	NA	NA	NA	FALSE	17
A0A287BNE9	TRIM28	NA	NA	NA	NA	NA	FALSE	18
A0A287BQ89	CIAO2A	NA	NA	NA	NA	NA	FALSE	16
A0A287BQI6	BZW2	NA	NA	NA	NA	NA	FALSE	18
A0A287BRI4	A0A287BRI4	NA	NA	NA	NA	NA	FALSE	18
A0A480SJI2	SRM	NA	NA	NA	NA	NA	FALSE	18
A0A480XE17	NUDT5	NA	NA	NA	NA	NA	FALSE	18
A0A481APG3	U2AF2	NA	NA	NA	NA	NA	FALSE	17
A0A4X1SG83	RPL24	NA	NA	NA	NA	NA	FALSE	18
A0A4X1SI91	API5	NA	NA	NA	NA	NA	FALSE	18
A0A4X1SJK8	RPS24	NA	NA	NA	NA	NA	FALSE	18
A0A4X1SK65	RPS3A	NA	NA	NA	NA	NA	FALSE	18
A0A4X1STM2	NNT	NA	NA	NA	NA	NA	FALSE	18
A0A4X1T4G7	AHSA1	NA	NA	NA	NA	NA	FALSE	18
A0A4X1T4S6	EIF2S2	NA	NA	NA	NA	NA	FALSE	18
A0A4X1TBE8	GSTM3	NA	NA	NA	NA	NA	FALSE	17
A0A4X1TGU9	EIF3E	NA	NA	NA	NA	NA	FALSE	18
A0A4X1TP11	HNRNPH3	NA	NA	NA	NA	NA	FALSE	18
A0A4X1TPT1	LOC100519675	NA	NA	NA	NA	NA	FALSE	18
A0A4X1TSN2	HADHB	NA	NA	NA	NA	NA	FALSE	18
A0A4X1TTH9	PEBP1	NA	NA	NA	NA	NA	FALSE	17
A0A4X1TVI4	LOC110261685	NA	NA	NA	NA	NA	FALSE	17
A0A4X1TXJ8	RPL30	NA	NA	NA	NA	NA	FALSE	17
A0A4X1TY93	HNRNPA2B1	NA	NA	NA	NA	NA	FALSE	18
A0A4X1TYR3	LOC110262272	NA	NA	NA	NA	NA	FALSE	18
A0A4X1U3N9	RPL5	NA	NA	NA	NA	NA	FALSE	18
A0A4X1U7Q3	FGR	NA	NA	NA	NA	NA	FALSE	18
A0A4X1UBQ4	CPNE3	NA	NA	NA	NA	NA	FALSE	18
A0A4X1UDL5	NUTF2	NA	NA	NA	NA	NA	FALSE	16
A0A4X1UMQ6	RPL37A	NA	NA	NA	NA	NA	FALSE	18
A0A4X1UN51	SRP14	NA	NA	NA	NA	NA	FALSE	18
A0A4X1UR68	ZFYVE19	NA	NA	NA	NA	NA	FALSE	18
A0A4X1UTN8	RHEX	NA	NA	NA	NA	NA	FALSE	16
A0A4X1UV69	APEX1	NA	NA	NA	NA	NA	FALSE	18
A0A4X1UZH9	PTPN6	NA	NA	NA	NA	NA	FALSE	18
A0A4X1V4J7	GABARAP	NA	NA	NA	NA	NA	FALSE	19
A0A4X1VAU7	STRAP	NA	NA	NA	NA	NA	FALSE	19
A0A4X1VDG8	ATP6V1B2	NA	NA	NA	NA	NA	FALSE	18
A0A4X1VEM2	PDCD10	NA	NA	NA	NA	NA	FALSE	17
A0A4X1VEP2	SYNCRIP	NA	NA	NA	NA	NA	FALSE	18
A0A4X1VPI3	A0A4X1VPI3	NA	NA	NA	NA	NA	FALSE	18
A0A4X1W1R6	SND1	NA	NA	NA	NA	NA	FALSE	18
A0A4X1W434	BLOC1S1	NA	NA	NA	NA	NA	FALSE	19
A0A4X1W4Q9	HNRNPA1	NA	NA	NA	NA	NA	FALSE	18
A0A4X1WB15	BTF3L4	NA	NA	NA	NA	NA	FALSE	18
A0A5G2QAP9	PPP3CA	NA	NA	NA	NA	NA	FALSE	16
A0A5G2QCN4	SLA-DQB1	NA	NA	NA	NA	NA	FALSE	14
A0A5G2QFX7	EPS15	NA	NA	NA	NA	NA	FALSE	18
A0A5G2QHF3	MCM5	NA	NA	NA	NA	NA	FALSE	18
A0A5G2QJC1	MYBPC2	NA	NA	NA	NA	NA	FALSE	17
A0A5G2QKC9	PPA1	NA	NA	NA	NA	NA	FALSE	18
A0A5G2QLQ1	DLAT	NA	NA	NA	NA	NA	FALSE	18
A0A5G2QQ26	GAK	NA	NA	NA	NA	NA	FALSE	18
A0A5G2QT83	PHB2	NA	NA	NA	NA	NA	FALSE	17
A0A5G2QTJ8	KPNA1	NA	NA	NA	NA	NA	FALSE	19
A0A5G2QVN7	FKBP4	NA	NA	NA	NA	NA	FALSE	19
A0A5G2QWN8	HNRNPAB	NA	NA	NA	NA	NA	FALSE	18
A0A5G2QZ25	DAP3	NA	NA	NA	NA	NA	FALSE	18
A0A5G2QZC6	A0A5G2QZC6	NA	NA	NA	NA	NA	FALSE	18
A0A5G2QZT2	SELP	NA	NA	NA	NA	NA	FALSE	18
A0A5G2R394	IPO4	NA	NA	NA	NA	NA	FALSE	16
A0A5G2R8E1	PPP1R12A	NA	NA	NA	NA	NA	FALSE	17
A0A5G2R8T3	MYO1E	NA	NA	NA	NA	NA	FALSE	18
A0A5G2RAE1	DDX46	NA	NA	NA	NA	NA	FALSE	18
A0A5G2RAQ9	OLA1	NA	NA	NA	NA	NA	FALSE	18
A0A5G2RBD3	KRT18	NA	NA	NA	NA	NA	FALSE	18
A0A5G2RCK3	TPD52L1	NA	NA	NA	NA	NA	FALSE	19
A0A5G2RDZ5	DRG2	NA	NA	NA	NA	NA	FALSE	18
A0A5G2RGR9	TAF15	NA	NA	NA	NA	NA	FALSE	18
A0A5G2RJN0	NBEAL2	NA	NA	NA	NA	NA	FALSE	19
A0A5K1TXL1	PLS3	NA	NA	NA	NA	NA	FALSE	17
A0A5K1V8K4	ABCE1	NA	NA	NA	NA	NA	FALSE	18
A0A8D0HXM4	CYRIB	NA	NA	NA	NA	NA	FALSE	16
A0A8D0MI12	TKTL1	NA	NA	NA	NA	NA	FALSE	19
A0A8D0QIL0	AK2	NA	NA	NA	NA	NA	FALSE	18
A0A8D0TY40	RBMX	NA	NA	NA	NA	NA	FALSE	18
A0A8D0WUQ7	ATCAY	NA	NA	NA	NA	NA	FALSE	18
A0A8D0X235	PA2G4	NA	NA	NA	NA	NA	FALSE	18
A0A8D0ZUT5	TUBAL3	NA	NA	NA	NA	NA	FALSE	18
A0A8D1D3Z6	XPOT	NA	NA	NA	NA	NA	FALSE	18
A0A8D1R1E7	PNP	NA	NA	NA	NA	NA	FALSE	18
A0A8D1UVZ9	STIP1	NA	NA	NA	NA	NA	FALSE	18
A0A8W4F6V7	LOC110255231	NA	NA	NA	NA	NA	FALSE	16
A0A8W4F936	TOR1B	NA	NA	NA	NA	NA	FALSE	17
A0A8W4F9I3	A0A8W4F9I3	NA	NA	NA	NA	NA	FALSE	18
A0A8W4FBD1	RPL36	NA	NA	NA	NA	NA	FALSE	18
A0A8W4FDV2	A0A8W4FDV2	NA	NA	NA	NA	NA	FALSE	17
A0A8W4FDZ3	EIF3I	NA	NA	NA	NA	NA	FALSE	18
A0A8W4FES3	DEK	NA	NA	NA	NA	NA	FALSE	19
A0A8W4FGA3	EIF3H	NA	NA	NA	NA	NA	FALSE	18
A0A8W4FHK5	PSMF1	NA	NA	NA	NA	NA	FALSE	16
A0A8W4FHN2	RPL7	NA	NA	NA	NA	NA	FALSE	17
A0A8W4FIA4	LOC100153359	NA	NA	NA	NA	NA	FALSE	19
A0A8W4FJW8	GART	NA	NA	NA	NA	NA	FALSE	17
A0A8W4FK85	GCLC	NA	NA	NA	NA	NA	FALSE	17
A0A8W4FP70	A0A8W4FP70	NA	NA	NA	NA	NA	FALSE	18
A0A8W4FR34	LSM4	NA	NA	NA	NA	NA	FALSE	18
A1XQR9	SNRPE	NA	NA	NA	NA	NA	FALSE	17
A1XQU3	RPL14	NA	NA	NA	NA	NA	FALSE	17
A4Z6H1	ADSS2	NA	NA	NA	NA	NA	FALSE	19
A5A8Y8	EGFL8	NA	NA	NA	NA	NA	FALSE	19
B2CCY7	PRPF19	NA	NA	NA	NA	NA	FALSE	18
B3VMR0	ATIC	NA	NA	NA	NA	NA	FALSE	18
B8Y648	UBE2L3	NA	NA	NA	NA	NA	FALSE	18
F1RF93	FBXO44	NA	NA	NA	NA	NA	FALSE	16
F1RFI1	TUFM	NA	NA	NA	NA	NA	FALSE	18
F1RFI2	AP1B1	NA	NA	NA	NA	NA	FALSE	17
F1RG16	HNRNPF	NA	NA	NA	NA	NA	FALSE	18
F1RGM7	UBE2Q1	NA	NA	NA	NA	NA	FALSE	19
F1RH60	AP2A1	NA	NA	NA	NA	NA	FALSE	18
F1RHH8	PRPF8	NA	NA	NA	NA	NA	FALSE	18
F1RHU6	PRMT1	NA	NA	NA	NA	NA	FALSE	18
F1RHW4	RRAS	NA	NA	NA	NA	NA	FALSE	18
F1RIE2	DDB1	NA	NA	NA	NA	NA	FALSE	17
F1RIP1	GYS1	NA	NA	NA	NA	NA	FALSE	19
F1RJL2	GTF2I	NA	NA	NA	NA	NA	FALSE	18
F1RJM2	ERP29	NA	NA	NA	NA	NA	FALSE	17
F1RJT3	DPYSL2	NA	NA	NA	NA	NA	FALSE	19
F1RL85	GRWD1	NA	NA	NA	NA	NA	FALSE	18
F1RMC1	DMTN	NA	NA	NA	NA	NA	FALSE	16
F1RMY6	TSC22D4	NA	NA	NA	NA	NA	FALSE	19
F1RPB7	DRG1	NA	NA	NA	NA	NA	FALSE	17
F1RQM2	PGM3	NA	NA	NA	NA	NA	FALSE	16
F1RQS9	SNX15	NA	NA	NA	NA	NA	FALSE	19
F1RQZ9	EFTUD2	NA	NA	NA	NA	NA	FALSE	18
F1RR89	RARS1	NA	NA	NA	NA	NA	FALSE	18
F1RSG9	LYPLA1	NA	NA	NA	NA	NA	FALSE	18
F1RTH3	AIFM1	NA	NA	NA	NA	NA	FALSE	18
F1RTZ0	RRS1	NA	NA	NA	NA	NA	FALSE	19
F1RVC9	HNRNPD	NA	NA	NA	NA	NA	FALSE	18
F1RVY7	GALK1	NA	NA	NA	NA	NA	FALSE	19
F1RWH6	CDK5RAP3	NA	NA	NA	NA	NA	FALSE	19
F1RX16	DDX3X	NA	NA	NA	NA	NA	FALSE	18
F1RXA1	PAG1	NA	NA	NA	NA	NA	FALSE	18
F1RYT3	SCARB2	NA	NA	NA	NA	NA	FALSE	18
F1RZ28	RPS10	NA	NA	NA	NA	NA	FALSE	18
F1RZK6	FRK	NA	NA	NA	NA	NA	FALSE	18
F1S0H1	KYNU	NA	NA	NA	NA	NA	FALSE	18
F1S0Y8	ADH4	NA	NA	NA	NA	NA	FALSE	18
F1S192	PFDN2	NA	NA	NA	NA	NA	FALSE	18
F1S1E7	DPYS	NA	NA	NA	NA	NA	FALSE	17
F1S1X3	NARS1	NA	NA	NA	NA	NA	FALSE	18
F1S340	SRI	NA	NA	NA	NA	NA	FALSE	18
F1S3E0	TMED9	NA	NA	NA	NA	NA	FALSE	17
F1S431	AARS1	NA	NA	NA	NA	NA	FALSE	17
F1S4V8	CPNE1	NA	NA	NA	NA	NA	FALSE	18
F1S5A8	DHX15	NA	NA	NA	NA	NA	FALSE	18
F1S5J1	LRPPRC	NA	NA	NA	NA	NA	FALSE	18
F1S5V7	LYPD8	NA	NA	NA	NA	NA	FALSE	17
F1S6Z3	ABRACL	NA	NA	NA	NA	NA	FALSE	16
F1S827	SERBP1	NA	NA	NA	NA	NA	FALSE	18
F1S8K5	SUPT16H	NA	NA	NA	NA	NA	FALSE	18
F1S9K5	EPRS1	NA	NA	NA	NA	NA	FALSE	19
F1S9S9	FUBP1	NA	NA	NA	NA	NA	FALSE	18
F1S9W8	KLC1	NA	NA	NA	NA	NA	FALSE	18
F1SD66	CHGA	NA	NA	NA	NA	NA	FALSE	18
F1SE73	DNAJA1	NA	NA	NA	NA	NA	FALSE	16
F1SE95	FRYL	NA	NA	NA	NA	NA	FALSE	19
F1SFI3	RFC4	NA	NA	NA	NA	NA	FALSE	19
F1SGH5	PDHB	NA	NA	NA	NA	NA	FALSE	18
F1SGR0	EIF3M	NA	NA	NA	NA	NA	FALSE	19
F1SGX4	CBR3	NA	NA	NA	NA	NA	FALSE	18
F1SHE8	WDR12	NA	NA	NA	NA	NA	FALSE	18
F1SHL0	CLEC14A	NA	NA	NA	NA	NA	FALSE	17
F1SIK9	SEPTIN7	NA	NA	NA	NA	NA	FALSE	17
F1SJ34	COX5A	NA	NA	NA	NA	NA	FALSE	18
F1SK95	CPOX	NA	NA	NA	NA	NA	FALSE	18
F1SKQ0	DDX17	NA	NA	NA	NA	NA	FALSE	18
F1SKS3	ERBIN	NA	NA	NA	NA	NA	FALSE	17
F1SMW3	SERPINB5	NA	NA	NA	NA	NA	FALSE	18
F1SND4	BRIX1	NA	NA	NA	NA	NA	FALSE	19
F1SNI1	WDR91	NA	NA	NA	NA	NA	FALSE	18
[truncated: 115 more rows]
